# Supplementary material
Source: Royal Society of Chemistry journal article supplement (doi:10.1039/d6nj01052k)

## Supporting Information

### **Application of various ylides in the [4+1] cycloaddition of enaminothiones and *N*-thioacylformamidines for constructing substituted thiophenes and thiazoles**

Yuhang Sun,<sup>a</sup> Junjie Wang,<sup>a</sup> Jiangwei Wen,<sup>a</sup> Xiaowen Qu,<sup>a</sup> Daoshan Yang,<sup>b,c</sup>  
and Kelu Yan<sup>a,\*</sup>

<sup>a</sup> Key Laboratory of Life-Organic Analysis of Shandong Province, School of Chemistry and Chemical Engineering, Qufu Normal University, Qufu, 273165, P. R. China.

E-mail: [yankl@qfnu.edu.cn](mailto:yankl@qfnu.edu.cn)

<sup>b</sup> College of Chemistry and Molecular Engineering, Qingdao University of Science and Technology, Qingdao, 266042, P. R. China.

<sup>c</sup> National Engineering Research Center of Low-Carbon Processing and Utilization of Forest Biomass, Nanjing Forestry University, Nanjing, 210037, P. R. China.

## Contents

|                                                                                        |         |
|----------------------------------------------------------------------------------------|---------|
| Table of Contents                                                                      | S2      |
| 1. Experimental Section: General Considerations                                        | S3      |
| 2. Table S1. Optimization Studies                                                      | S3–S4   |
| 3. Synthetic Procedures                                                                | S4–S7   |
| (a) Preparation of <b>3</b> by Enaminothiones and Sulfoxonium ylides                   | S4–S5   |
| (b) Preparation of <b>3aa</b> by Enaminothiones and Ammonium ylides/Phosphonium ylides | S5      |
| (c) Preparation of <b>10</b> by <i>N</i> -thioacylformamidines and Sulfoxonium Ylides  | S5      |
| (d) Gram-Scale Preparation of <b>3aa</b>                                               | S5–S6   |
| (e) Gram-Scale Preparation of <b>10aa</b>                                              | S6      |
| (f) Derivatization Reaction of <b>3aa</b> for the Preparation of <b>11</b>             | S6–S7   |
| (g) Derivatization Reaction of <b>3aa</b> for the Preparation of <b>13</b>             | S7      |
| 4. Characterization of <b>3</b> , <b>10</b> , <b>11</b> and <b>13</b>                  | S7–S17  |
| 5. X-ray Crystallography of <b>3ak</b>                                                 | S17–S18 |
| 6. Experiments on the Mechanism and Reactivity Trends of Different Substrates          | S18–S21 |
| (a) Free Radical Interference Experiment                                               | S18–S19 |
| (b) Competition Experiment of <b>1c</b> and <b>1h</b>                                  | S19     |
| (c) Competition Experiment of <b>2c</b> and <b>2g</b>                                  | S20     |
| (d) Detection of Intermediate <b>B</b> by ESI-MS                                       | S20–S21 |
| 7. References                                                                          | S21     |
| 8. NMR Spectra                                                                         | S22–S56 |

## 1. Experimental Section:

**General Considerations.** All products were prepared using standard Schlenk technique.  $^1\text{H}$ ,  $^{13}\text{C}$  and  $^{19}\text{F}$  NMR data were recorded with Bruker Advance III (500 MHz) spectrometers with tetramethylsilane as an internal standard. All chemical shifts ( $\delta$ ) are reported in ppm and coupling constants ( $J$ ) in Hz. All chemical shifts are reported relative to tetramethylsilane and d-solvent peaks, respectively. Multiplicities are reported as follows: singlet (s), doublet (d), doublet of doublets (dd), triplet (t), quartet (q), and multiplet (m). Column chromatography was performed on silica gel 200–300 mesh. Analytical thin-layer chromatography (TLC) was performed on pre-coated, glass-backed silica gel plates. Visualization of the developed chromatogram was performed by UV absorbance (254 nm). High-resolution mass spectrometry (HRMS) were done on an electrospray ionization (ESI) Fourier transform mass spectrometer (FTMS, Thermo QExactive Focus). X-ray diffraction (XRD) patterns were recorded on a Rigaku smartlab system at 45 kV and 200 mA with Cu-K $\alpha$  radiation. Unless otherwise noted below, all other compounds have been reported in the literature or are commercially available from Aldrich, Acros, Alfa Aesar, and Energy Chemical Company and used as received without any further purification.

## 2. Table S1. Optimization studies<sup>a</sup>

Initially, (*E*)-3-(dimethylamino)-1-phenylprop-2-ene-1-thione (**1a**) was introduced to react with 2-(dimethyl(oxo)- $\lambda^6$ -sulfanylidene)-1-phenylethan-1-one (**2a**) in acetonitrile ( $\text{CH}_3\text{CN}$ ) at 90 °C for 12 h under air. The product of phenyl(5-phenylthiophen-2-yl)methanone (**3aa**) was achieved with a yield of 82% (Table S1, entry 1). Several studies on solvents showed that  $\text{CH}_3\text{CN}$  was more suitable for this transformation than 1,2-dichloroethane (DCE), dimethyl sulfoxide (DMSO),  $\text{CH}_3\text{OH}$ , tetrahydrofuran (THF) and toluene (entries 1–6). However, several additives including  $\text{K}_2\text{CO}_3$ , DBU, HOAc, HCl,  $\text{Zn}(\text{OAc})_2$  and  $\text{AlCl}_3$  did not promote this reaction (entries 7–12). In addition, the reactions at 70 °C and 100 °C established product **3aa** with yields of 66% and 80%, respectively (entries 13–14). Therefore, the factors of entry 1 were selected as the standard conditions.

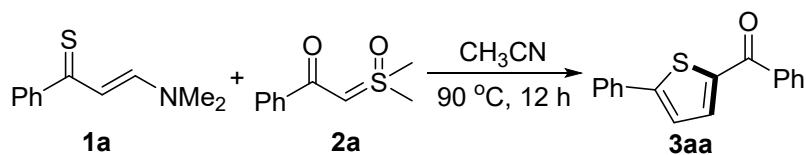

| Entry | Deviation from standard conditions                     | Yield (%) <sup>b</sup> |
|-------|--------------------------------------------------------|------------------------|
| 1     | none                                                   | 82                     |
| 2     | DCE instead of CH <sub>3</sub> CN                      | 65                     |
| 3     | DMSO instead of CH <sub>3</sub> CN                     | 38                     |
| 4     | CH <sub>3</sub> OH instead of CH <sub>3</sub> CN       | 16                     |
| 5     | THF instead of CH <sub>3</sub> CN                      | 74                     |
| 6     | Toluene instead of CH <sub>3</sub> CN                  | 55                     |
| 7     | K <sub>2</sub> CO <sub>3</sub> was added as a additive | 55                     |
| 8     | DBU was added as a additive                            | 62                     |
| 9     | HOAc was added as a additive                           | 76                     |
| 10    | HCl was added as a additive                            | 78                     |
| 11    | Zn(OAc) <sub>2</sub> was added as a additive           | 80                     |
| 12    | AlCl <sub>3</sub> was added as a additive              | 79                     |
| 13    | 70 °C                                                  | 66                     |
| 14    | 110 °C                                                 | 80                     |

<sup>a</sup> Reaction conditions: **1a** (0.2 mmol), **2a** (0.3 mmol), additive (0.2 mmol), solvent (1.5 mL), 12 h, under air. <sup>b</sup> Isolated yields.

### 3. Synthetic Procedures

#### (a) Preparation of **3** by Enaminothiones and Sulfoxonium Ylides

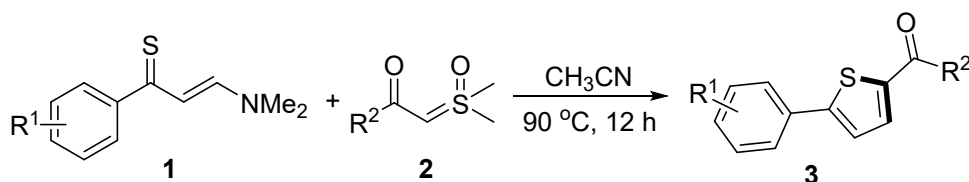

A mixture of substituted enaminothiones (**1**) (0.2 mmol, 1.0 equiv) and sulfoxonium ylides (**2**) (0.3 mmol, 1.5 equiv) were weighted in a Schlenk tube equipped with a stir bar. Dry CH<sub>3</sub>CN (1.5 mL) were added and the mixture was stirred at 90 °C in a pre-heated oil bath for 12 h under air. Then, the mixture was cooled to room temperature and concentrated in vacuo

and the resulting residue was purified by column chromatography on silica gel with EtOAc/petroleum ether.

**(b) Preparation of 3aa by Enaminothiones and Ammonium ylides/Phosponium ylides**

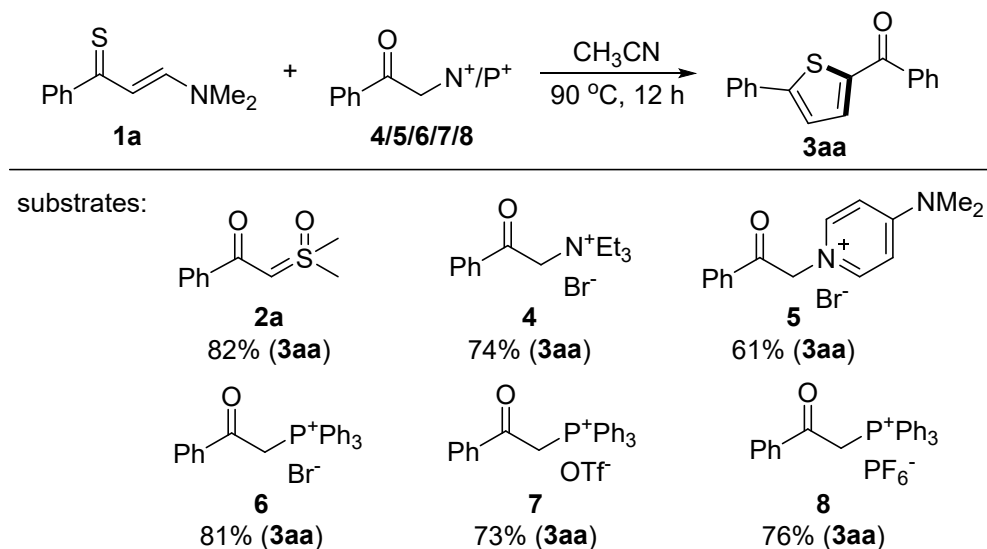

A mixture of (*E*)-3-(dimethylamino)-1-phenylprop-2-ene-1-thione (**1a**) (0.2 mmol, 1.0 equiv) and ammonium ylides or phosphonium ylides (**4/5/6/7/8**) (0.3 mmol, 1.5 equiv) were weighted in a Schlenk tube equipped with a stir bar. Dry  $\text{CH}_3\text{CN}$  (1.5 mL) were added and the mixture was stirred at  $90\text{ }^\circ\text{C}$  in a pre-heated oil bath for 12 h under air. Then, the mixture was cooled to room temperature and concentrated in vacuo and the resulting residue was purified by column chromatography on silica gel with EtOAc/petroleum ether.

**(c) Preparation of 10 by *N*-thioacylformamidines and Sulfoxonium Ylides**

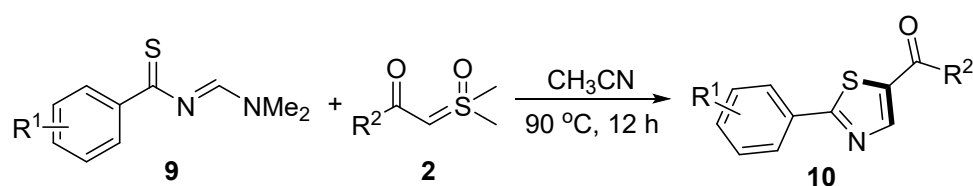

A mixture of substituted *N*-thioacylformamidines (**9**) (0.2 mmol, 1.0 equiv) and sulfoxonium ylides (**2**) (0.3 mmol, 1.5 equiv) were weighted in a Schlenk tube equipped with a stir bar. Dry  $\text{CH}_3\text{CN}$  (1.5 mL) were added and the mixture was stirred at  $90\text{ }^\circ\text{C}$  in a pre-heated oil bath for 12 h under air. Then, the mixture was cooled to room temperature and concentrated in vacuo and the resulting residue was purified by column chromatography on silica gel with EtOAc/petroleum ether.

**(d) Gram-Scale Preparation of 3aa**

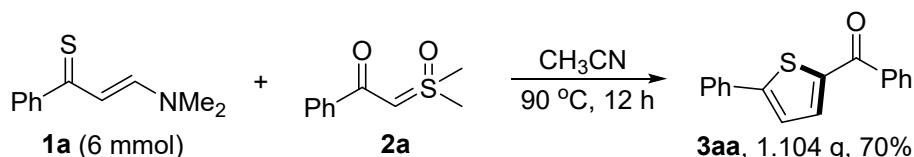

A mixture of (*E*)-3-(dimethylamino)-1-phenylprop-2-ene-1-thione (**1a**) (1146.5 mg, 6.0 mmol, 1.0 equiv) and 2-(dimethyl(oxo)- $\lambda^6$ -sulfaneylidene)-1-phenylethan-1-one (**2a**) (1764.5 mg, 9 mmol, 1.5 equiv) were weighted in a Schlenk sealed tube equipped with a stir bar. Dry  $\text{CH}_3\text{CN}$  (20 mL) was added and the mixture was stirred at 90 °C in a pre-heated oil bath for 12 h under air. Then, the mixture was cooled to room temperature and concentrated in vacuo and the resulting residue was purified by flash column chromatography on silica gel with EtOAc/petroleum ether, the product **3aa** was afforded as a white solid in 70% yield (1.104 g, 4.18 mmol).

#### (e) Gram-Scale Preparation of 10aa

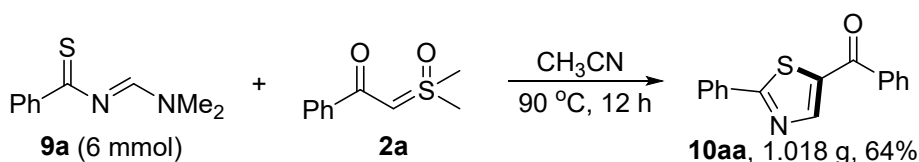

A mixture of (*E*)-*N*-((dimethylamino)methylene)benzothioamide (**9a**) (1152.4 mg, 6.0 mmol, 1.0 equiv) and 2-(dimethyl(oxo)- $\lambda^6$ -sulfaneylidene)-1-phenylethan-1-one (**2a**) (1764.5 mg, 9 mmol, 1.5 equiv) were weighted in a Schlenk sealed tube equipped with a stir bar. Dry  $\text{CH}_3\text{CN}$  (20 mL) was added and the mixture was stirred at 90 °C in a pre-heated oil bath for 12 h under air. Then, the mixture was cooled to room temperature and concentrated in vacuo and the resulting residue was purified by flash column chromatography on silica gel with EtOAc/petroleum ether, the product **10aa** was afforded as a white solid in 64% yield (1.018 g, 3.84 mmol).

#### (f) Derivatization Reaction of 3aa for the Preparation of 11

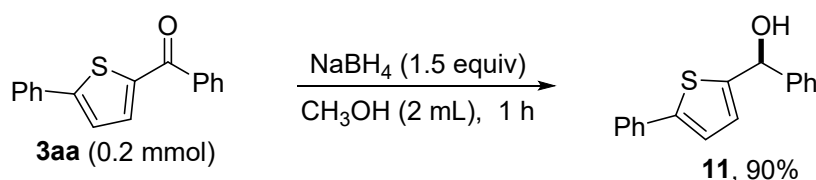

A mixture of phenyl(5-phenylthiophen-2-yl)methanone (**3aa**) (0.2 mmol, 1.0 equiv), and  $\text{NaBH}_4$  (0.3 mmol, 1.5 equiv) were weighted in a Schlenk tube equipped with a stir bar. Dry  $\text{MeOH}$  (2 mL) was added and the mixture was stirred at room temperature for 1 h. Then, the

mixture was concentrated in vacuo and the resulting residue was purified by flash column chromatography on silica gel with EtOAc/petroleum ether, the product **11** was afforded as a white solid in 90% yield (47.9 mg, 0.180 mmol).

#### (g) Derivatization Reaction of **3aa** for the Preparation of **13**

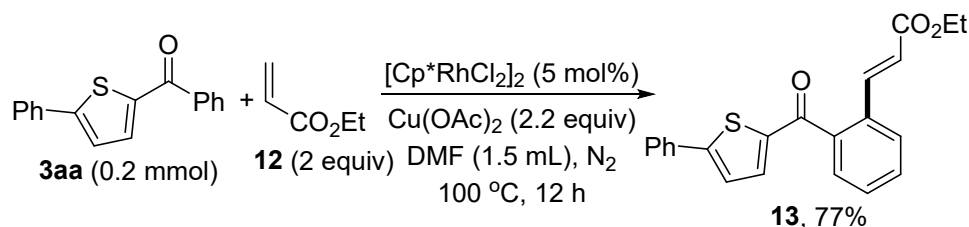

A mixture of phenyl(5-phenylthiophen-2-yl)methanone (**3aa**) (52.8 mg, 0.2 mmol, 1.0 equiv), ethyl acrylate (**12**) (40.0 mg, 0.4 mmol, 2 equiv),  $[(\text{Cp}^*\text{RhCl}_2)_2]$  (6.2 mg, 0.01 mmol, 5 mol%) and  $\text{Cu}(\text{OAc})_2$  (2.2 equiv) were weighted in a Schlenk sealed tube equipped with a stir bar. Dry DMF (1.5 mL) was added and the mixture was stirred at 100 °C in a pre-heated oil bath for 12 h under  $\text{N}_2$  atmosphere. Then, the mixture was cooled to room temperature and concentrated in vacuo and the resulting residue was purified by flash column chromatography on silica gel with EtOAc/petroleum ether, the product **13** was afforded as a white solid in 77% yield (55.8 mg, 0.154 mmol).

#### 4. Characterization of Products **3**, **10**, **11** and **13**

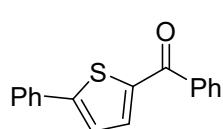

##### (phenyl(5-phenylthiophen-2-yl)methanone (**3aa**))<sup>[1]</sup>

The title compound was isolated by column chromatography (eluent: EtOAc/petroleum ether = 1/20) as a white solid in 82% yield (43.3 mg, 0.164 mmol). Mp: 132 – 133 °C. **<sup>1</sup>H NMR (CDCl<sub>3</sub>, 500 MHz):**  $\delta$  7.88 (d,  $J$  = 7.1 Hz, 2H), 7.69 (d,  $J$  = 7.2 Hz, 2H), 7.62 – 7.58 (m, 2H), 7.51 (t,  $J$  = 7.6 Hz, 2H), 7.43 (t,  $J$  = 7.4 Hz, 2H), 7.39 (d,  $J$  = 7.2 Hz, 1H), 7.36 (d,  $J$  = 4.0 Hz, 1H). **<sup>13</sup>C NMR (CDCl<sub>3</sub>, 125 MHz):**  $\delta$  188.0, 153.2, 142.2, 138.1, 135.9, 133.3, 132.2, 129.1, 129.1, 129.1, 128.4, 126.3, 123.8.

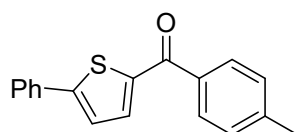

##### (5-phenylthiophen-2-yl)(*p*-tolyl)methanone (**3ab**)

The title compound was isolated by column chromatography (eluent: EtOAc/petroleum ether = 1/20) as a white solid in 84% yield (46.7 mg, 0.168 mmol). Mp: 154 – 155 °C. **<sup>1</sup>H NMR (CDCl<sub>3</sub>, 500 MHz):**  $\delta$  7.81 (d,  $J$  = 8.1 Hz,

2H), 7.69 (d,  $J = 7.1$  Hz, 2H), 7.62 (d,  $J = 3.9$  Hz, 1H), 7.43 (t,  $J = 7.3$  Hz, 2H), 7.38 (t,  $J = 7.2$  Hz, 1H), 7.35 (d,  $J = 3.9$  Hz, 1H), 7.31 (d,  $J = 7.9$  Hz, 2H), 2.46 (s, 3H).  **$^{13}\text{C}$  NMR (CDCl<sub>3</sub>, 125 MHz):**  $\delta$  187.7, 152.8, 142.9, 142.5, 135.5, 135.4, 133.4, 129.3, 129.1, 129.1, 129.0, 126.3, 123.8, 21.6. **HRMS (ESI):** Calcd for C<sub>18</sub>H<sub>15</sub>OS [M+H]<sup>+</sup> 279.0838, found: 279.0836.

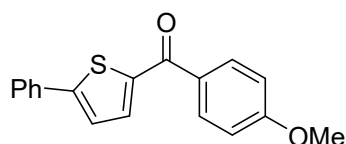

**(4-methoxyphenyl)(5-phenylthiophen-2-yl)methanone (3ac)**

The title compound was isolated by column chromatography (eluent: EtOAc/petroleum ether = 1/20) as a white solid in 77% yield (45.3 mg, 0.154 mmol). Mp: 152 – 153 °C.  **$^1\text{H}$  NMR (CDCl<sub>3</sub>, 500 MHz):**  $\delta$  7.92 (d,  $J = 8.6$  Hz, 2H), 7.69 (d,  $J = 7.1$  Hz, 2H), 7.61 (d,  $J = 3.8$  Hz, 1H), 7.50 – 7.33 (m, 4H), 7.00 (d,  $J = 8.6$  Hz, 2H), 3.89 (s, 3H).  **$^{13}\text{C}$  NMR (CDCl<sub>3</sub>, 125 MHz):**  $\delta$  186.6, 163.0, 152.4, 142.5, 135.1, 133.4, 131.5, 130.6, 129.1, 128.9, 126.3, 123.7, 113.7, 55.5. **HRMS (ESI):** Calcd for C<sub>18</sub>H<sub>15</sub>O<sub>2</sub>S [M+H]<sup>+</sup> 295.0787, found: 295.0786.

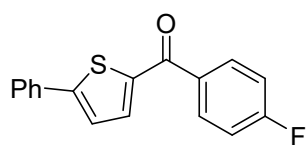

**(4-fluorophenyl)(5-phenylthiophen-2-yl)methanone (3ad)**

The title compound was isolated by column chromatography (eluent: EtOAc/petroleum ether = 1/20) as a white solid in 71% yield (40.1 mg, 0.142 mmol). Mp: 143 – 144 °C.  **$^1\text{H}$  NMR (CDCl<sub>3</sub>, 500 MHz):**  $\delta$  7.97 – 7.89 (m, 2H), 7.72 – 7.67 (m, 2H), 7.60 (d,  $J = 3.9$  Hz, 1H), 7.44 (t,  $J = 7.3$  Hz, 2H), 7.40 (d,  $J = 7.2$  Hz, 1H), 7.36 (d,  $J = 3.9$  Hz, 1H), 7.19 (t,  $J = 8.6$  Hz, 2H).  **$^{13}\text{C}$  NMR (CDCl<sub>3</sub>, 125 MHz):**  $\delta$  186.5, 165.2 (d,  $J = 253.5$  Hz), 153.4, 141.9, 135.7, 134.3 (d,  $J = 2.9$  Hz), 133.2, 131.6 (d,  $J = 9.0$  Hz), 129.2, 126.3, 123.8, 115.6 (d,  $J = 21.9$  Hz).  **$^{19}\text{F}$  NMR (CDCl<sub>3</sub>, 471 MHz):**  $\delta$  -106.3. **HRMS (ESI):** Calcd for C<sub>17</sub>H<sub>12</sub>FOS [M+H]<sup>+</sup> 283.0587, found: 283.0589.

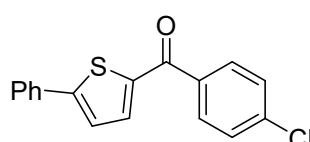

**(4-chlorophenyl)(5-phenylthiophen-2-yl)methanone (3ae)**

The title compound was isolated by column chromatography (eluent: EtOAc/petroleum ether = 1/20) as a white solid in 75% yield (44.7 mg, 0.150 mmol). Mp: 108 – 108 °C.  **$^1\text{H}$  NMR (CDCl<sub>3</sub>, 500 MHz):**  $\delta$  7.83 (d,  $J = 8.4$  Hz, 2H), 7.69 (d,  $J = 7.2$  Hz, 2H), 7.59 (d,  $J = 3.9$  Hz, 1H), 7.49 (d,  $J = 8.4$  Hz, 2H), 7.44 (t,  $J = 7.3$  Hz, 2H), 7.39 (t,  $J = 7.1$  Hz, 1H), 7.36 (d,  $J = 3.9$  Hz, 1H).  **$^{13}\text{C}$  NMR (CDCl<sub>3</sub>, 125**

**MHz):**  $\delta$  186.7, 153.6, 141.8, 138.6, 136.4, 135.8, 133.2, 130.5, 129.2, 129.2, 128.8, 126.4, 123.9. **HRMS (ESI):** Calcd for  $C_{17}H_{12}ClOS$   $[M+H]^+$  299.0292, found: 299.0289.

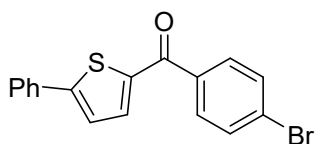

**(4-bromophenyl)(5-phenylthiophen-2-yl)methanone (3af)<sup>[2]</sup>**

The title compound was isolated by column chromatography (eluent: EtOAc/petroleum ether = 1/20) as a white solid in 72% yield (49.2 mg, 0.144 mmol). Mp: 156 – 157 °C. **<sup>1</sup>H NMR (CDCl<sub>3</sub>, 500 MHz):**  $\delta$  7.76 (d,  $J$  = 8.4 Hz, 2H), 7.69 (d,  $J$  = 7.2 Hz, 2H), 7.65 (d,  $J$  = 8.4 Hz, 2H), 7.59 (d,  $J$  = 4.0 Hz, 1H), 7.44 (t,  $J$  = 7.3 Hz, 2H), 7.39 (t,  $J$  = 7.3 Hz, 1H), 7.36 (d,  $J$  = 4.0 Hz, 1H). **<sup>13</sup>C NMR (CDCl<sub>3</sub>, 125 MHz):**  $\delta$  186.8, 153.7, 141.7, 136.8, 135.9, 133.2, 131.7, 130.6, 129.2, 129.2, 127.1, 126.3, 123.9.

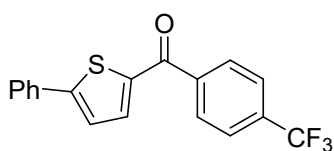

**(5-phenylthiophen-2-yl)(4-(trifluoromethyl)phenyl)methanone (3ag)**

The title compound was isolated by column chromatography (eluent: EtOAc/petroleum ether = 1/20) as a white solid in 66% yield (43.8 mg, 0.132 mmol). Mp: 186 – 187 °C. **<sup>1</sup>H NMR (CDCl<sub>3</sub>, 500 MHz):**  $\delta$  7.97 (d,  $J$  = 8.0 Hz, 2H), 7.78 (d,  $J$  = 8.1 Hz, 2H), 7.70 (d,  $J$  = 7.1 Hz, 2H), 7.59 (d,  $J$  = 4.0 Hz, 1H), 7.49 – 7.39 (m, 3H), 7.37 (d,  $J$  = 4.0 Hz, 1H). **<sup>13</sup>C NMR (CDCl<sub>3</sub>, 125 MHz):**  $\delta$  186.8, 154.3, 141.5, 141.2, 136.4, 133.6 (q,  $J$  = 32.7 Hz), 133.0, 129.4, 129.2, 129.2, 126.4, 125.5 (q,  $J$  = 3.9 Hz), 124.0, 123.7 (q,  $J$  = 272.6 Hz). **<sup>19</sup>F NMR (CDCl<sub>3</sub>, 471 MHz):**  $\delta$  -62.9. **HRMS (ESI):** Calcd for  $C_{18}H_{11}F_3NaOS$   $[M+Na]^+$  355.0375, found: 355.0369.

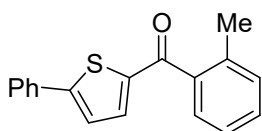

**(5-phenylthiophen-2-yl)(*o*-tolyl)methanone (3ah)**

The title compound was isolated by column chromatography (eluent: EtOAc/petroleum ether = 1/20) as a white solid in 74% yield (41.2 mg, 0.148 mmol). Mp: 103 – 104 °C. **<sup>1</sup>H NMR (CDCl<sub>3</sub>, 500 MHz):**  $\delta$  7.68 (d,  $J$  = 7.0 Hz, 2H), 7.48 (d,  $J$  = 7.5 Hz, 1H), 7.45 – 7.37 (m, 5H), 7.32 – 7.26 (m, 3H), 2.43 (s, 3H). **<sup>13</sup>C NMR (CDCl<sub>3</sub>, 125 MHz):**  $\delta$  190.1, 153.7, 143.3, 138.2, 136.4, 136.3, 133.2, 131.0, 130.2, 129.0,

129.0, 127.9, 126.2, 125.0, 123.9, 19.6. **HRMS (ESI):** Calcd for C<sub>18</sub>H<sub>15</sub>OS [M+H]<sup>+</sup> 279.0838, found: 279.0835.

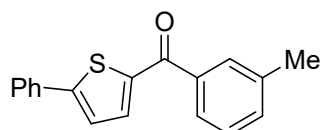

**(5-phenylthiophen-2-yl)(*m*-tolyl)methanone (3ai)<sup>[3]</sup>**

The title compound was isolated by column chromatography (eluent: EtOAc/petroleum ether = 1/20) as a white solid in 81% yield (45.0 mg, 0.162 mmol). Mp: 109 – 110 °C. **<sup>1</sup>H NMR (CDCl<sub>3</sub>, 500 MHz):** δ 7.71 – 7.66 (m, 4H), 7.61 (d, *J* = 4.0 Hz, 1H), 7.41 (7.45 – 7.37, 5H), 7.35 (d, *J* = 4.0 Hz, 1H), 2.45 (s, 3H). **<sup>13</sup>C NMR (CDCl<sub>3</sub>, 125 MHz):** δ 188.2, 153.0, 142.3, 138.3, 138.1, 135.9, 133.3, 132.9, 129.5, 129.1, 129.0, 128.2, 126.3, 123.8, 21.3.

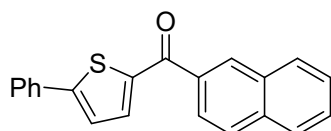

**naphthalen-2-yl(5-phenylthiophen-2-yl)methanone (3aj)**

The title compound was isolated by column chromatography (eluent: EtOAc/petroleum ether = 1/20) as a white solid in 80% yield (50.3 mg, 0.160 mmol). Mp: 84 – 85 °C. **<sup>1</sup>H NMR (CDCl<sub>3</sub>, 500 MHz):** δ 8.22 (dd, *J* = 5.4, 4.3 Hz, 1H), 8.01 (d, *J* = 8.3 Hz, 1H), 7.93 (dd, *J* = 5.5, 4.1 Hz, 1H), 7.76 (d, *J* = 7.0 Hz, 1H), 7.70 (d, *J* = 7.0 Hz, 2H), 7.57 – 7.52 (m, 3H), 7.46 – 7.38 (m, 4H), 7.30 (d, *J* = 4.0 Hz, 1H). **<sup>13</sup>C NMR (CDCl<sub>3</sub>, 125 MHz):** δ 189.4, 154.0, 143.7, 136.7, 136.0, 133.7, 133.2, 131.2, 130.5, 129.1, 129.1, 128.3, 127.2, 126.9, 126.5, 126.3, 125.5, 124.2, 123.9. **HRMS (ESI):** Calcd for C<sub>21</sub>H<sub>14</sub>NaOS [M+Na]<sup>+</sup> 377.0658, found: 377.0655.

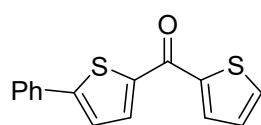

**(5-phenylthiophen-2-yl)(thiophen-2-yl)methanone (3ak)**

The title compound was isolated by column chromatography (eluent: EtOAc/petroleum ether = 1/20) as a white solid in 78% yield (42.1 mg, 0.156 mmol). Mp: 126 – 127 °C. **<sup>1</sup>H NMR (CDCl<sub>3</sub>, 500 MHz):** δ 7.93 (d, *J* = 3.7 Hz, 1H), 7.88 (d, *J* = 4.0 Hz, 1H), 7.70 – 7.68 (m, 3H), 7.44 (t, *J* = 7.4 Hz, 2H), 7.40 – 7.36 (m, 2H), 7.21 – 7.19 (m, 1H). **<sup>13</sup>C NMR (CDCl<sub>3</sub>, 125 MHz):** δ 178.5, 152.6, 142.8, 141.6, 134.2, 133.3, 132.9, 129.1, 129.1, 127.9, 126.3, 123.8. **HRMS (ESI):** Calcd for C<sub>15</sub>H<sub>10</sub>NaOS<sub>2</sub> [M+Na]<sup>+</sup> 293.0065, found: 293.0061.

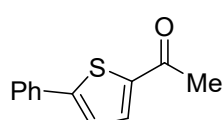

**1-(5-phenylthiophen-2-yl)ethan-1-one (3al)**

The title compound was isolated by column chromatography (eluent: EtOAc/petroleum ether = 1/20) as a white solid in 83% yield (33.5 mg, 0.166 mmol). Mp: 115 – 116 °C. **<sup>1</sup>H NMR (CDCl<sub>3</sub>, 500 MHz):** δ 7.67 – 7.64 (m, 3H), 7.43 – 7.39 (m, 2H), 7.38 – 7.35 (m, 1H), 7.31 (d, *J* = 3.9 Hz, 1H), 2.56 (s, 3H). **<sup>13</sup>C NMR (CDCl<sub>3</sub>, 125 MHz):** δ 190.5, 152.7, 143.0, 133.4, 133.3, 129.1, 129.0, 126.2, 123.9, 26.5. **HRMS (ESI):** Calcd for C<sub>12</sub>H<sub>11</sub>OS [M+H]<sup>+</sup> 203.0525, found: 203.0527.

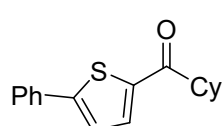

**cyclohexyl(5-phenylthiophen-2-yl)methanone (3am)**

The title compound was isolated by column chromatography (eluent: EtOAc/petroleum ether = 1/20) as a white solid in 79% yield (42.7 mg, 0.158 mmol). Mp: 105 – 106 °C. **<sup>1</sup>H NMR (CDCl<sub>3</sub>, 500 MHz):** δ 7.72 – 7.61 (m, 3H), 7.41 (t, *J* = 7.4 Hz, 2H), 7.37 – 7.34 (m, 1H), 7.31 (d, *J* = 3.9 Hz, 1H), 3.13 – 3.08 (m, 1H), 1.95 – 1.84 (m, 4H), 1.61 – 1.53 (m, 2H), 1.46 – 1.17 (m, 4H). **<sup>13</sup>C NMR (CDCl<sub>3</sub>, 125 MHz):** δ 196.6, 152.2, 142.4, 133.4, 132.4, 129.0, 128.8, 126.2, 123.8, 47.1, 29.6, 25.8. **HRMS (ESI):** Calcd for C<sub>17</sub>H<sub>18</sub>NaOS [M+Na]<sup>+</sup> 293.0971, found: 293.0965.

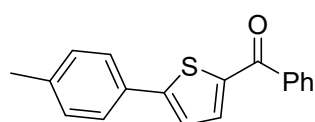

**phenyl(5-(*p*-tolyl)thiophen-2-yl)methanone (3ba)<sup>[4]</sup>**

The title compound was isolated by column chromatography (eluent: EtOAc/petroleum ether = 1/20) as a white solid in 80% yield (44.5 mg, 0.160 mmol). Mp: 138 – 139 °C. **<sup>1</sup>H NMR (CDCl<sub>3</sub>, 500 MHz):** δ 7.88 (d, *J* = 7.9 Hz, 2H), 7.59 (t, *J* = 6.2 Hz, 4H), 7.50 (t, *J* = 7.7 Hz, 2H), 7.31 (d, *J* = 3.9 Hz, 1H), 7.23 (d, *J* = 8.0 Hz, 2H), 2.39 (s, 3H). **<sup>13</sup>C NMR (CDCl<sub>3</sub>, 125 MHz):** δ 188.0, 153.5, 141.7, 139.3, 138.2, 136.0, 132.1, 130.5, 129.8, 129.0, 128.4, 126.2, 123.3, 21.3.

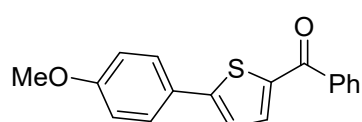

**(5-(4-methoxyphenyl)thiophen-2-yl)(phenyl)methanone (3c a)<sup>[4]</sup>**

The title compound was isolated by column chromatography (eluent: EtOAc/petroleum ether = 1/20) as a white solid in 81% yield (47.6 mg, 0.162 mmol). Mp: 144 – 145 °C. **<sup>1</sup>H NMR (CDCl<sub>3</sub>, 500 MHz):** δ 7.89 (d, *J* = 7.4 Hz, 2H), 7.65 (d, *J* = 8.6 Hz, 2H), 7.62 – 7.58 (m, 2H), 7.52 (t, *J* = 7.5 Hz, 2H), 7.28 – 7.26 (m, 1H), 6.97 (d, *J* = 8.6

Hz, 2H), 3.87 (s, 3H). **<sup>13</sup>C NMR (CDCl<sub>3</sub>, 125 MHz):** δ 188.0, 160.5, 153.5, 141.3, 138.2, 136.2, 132.0, 129.0, 128.4, 127.7, 126.1, 122.8, 114.5, 55.4.

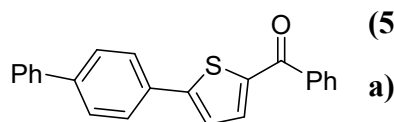

**(5-([1,1'-biphenyl]-4-yl)thiophen-2-yl)(phenyl)methanone (3d)**

**a)** The title compound was isolated by column chromatography (eluent: EtOAc/petroleum ether = 1/20) as a white solid in 76% yield (51.7 mg, 0.152 mmol). Mp: 182 – 183 °C. **<sup>1</sup>H NMR (CDCl<sub>3</sub>, 500 MHz):** δ 7.90 (d, *J* = 7.1 Hz, 2H), 7.78 (d, *J* = 8.3 Hz, 2H), 7.67 (d, *J* = 8.3 Hz, 2H), 7.65 – 7.59 (m, 4H), 7.52 (t, *J* = 7.6 Hz, 2H), 7.47 (t, *J* = 7.6 Hz, 2H), 7.41 – 7.37 (m, 2H). **<sup>13</sup>C NMR (CDCl<sub>3</sub>, 125 MHz):** δ 188.0, 152.9, 142.3, 141.9, 140.1, 138.1, 136.0, 132.2, 129.1, 128.9, 128.4, 127.8, 127.0, 126.7, 123.8. **HRMS (ESI):** Calcd for C<sub>23</sub>H<sub>17</sub>OS [M+H]<sup>+</sup> 341.0995, found: 341.0996.

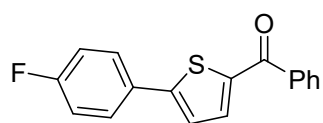

**(5-(4-fluorophenyl)thiophen-2-yl)(phenyl)methanone (3ea)<sup>[4]</sup>**

The title compound was isolated by column chromatography (eluent: EtOAc/petroleum ether = 1/20) as a white solid in 70% yield (39.5 mg, 0.140 mmol). Mp: 141 – 142 °C. **<sup>1</sup>H NMR (CDCl<sub>3</sub>, 500 MHz):** δ<sup>1</sup>H NMR (500 MHz, CDCl<sub>3</sub>) δ 7.88 (d, *J* = 7.0 Hz, 2H), 7.68 – 7.64 (m, 2H), 7.62 – 7.58 (m, 2H), 7.51 (t, *J* = 7.6 Hz, 2H), 7.29 (d, *J* = 3.9 Hz, 1H), 7.15 – 7.10 (m, 2H). **<sup>13</sup>C NMR (CDCl<sub>3</sub>, 125 MHz):** δ 187.9, 163.3 (d, *J* = 249.8 Hz), 152.0, 142.4, 138.0, 135.9, 132.2, 129.7 (d, *J* = 3.4 Hz), 129.1, 128.4, 128.2 (d, *J* = 8.2 Hz), 123.8, 116.2 (d, *J* = 22.0 Hz). **<sup>19</sup>F NMR (CDCl<sub>3</sub>, 471 MHz):** δ -111.8.

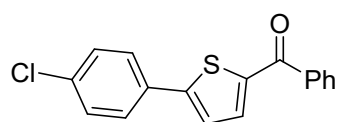

**(5-(4-chlorophenyl)thiophen-2-yl)(phenyl)methanone (3fa)<sup>[4]</sup>**

The title compound was isolated by column chromatography (eluent: EtOAc/petroleum ether = 1/20) as a white solid in 74% yield (44.1 mg, 0.148 mmol). Mp: 145 – 146 °C. **<sup>1</sup>H NMR (CDCl<sub>3</sub>, 500 MHz):** δ 7.90 – 7.84 (m, 2H), 7.63 – 7.58 (m, 3H), 7.57 – 7.53 (m, 2H), 7.51 (t, *J* = 7.6 Hz, 2H), 7.41 – 7.38 (m, 1H), 7.33 (t, *J* = 4.2 Hz, 1H). **<sup>13</sup>C NMR (CDCl<sub>3</sub>, 125 MHz):** δ 187.9, 151.6, 142.6, 137.9, 135.8, 135.0, 132.3, 131.8, 129.3, 129.1, 128.4, 127.5, 124.1.

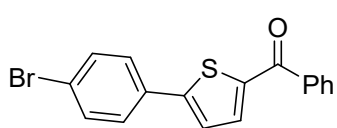

**(5-(4-bromophenyl)thiophen-2-yl)(phenyl)methanone (3ga)**

The title compound was isolated by column chromatography (eluent: EtOAc/petroleum ether = 1/20) as a white solid in 75% yield (51.3 mg, 0.150 mmol). Mp: 153 – 154 °C. **<sup>1</sup>H NMR (CDCl<sub>3</sub>, 500 MHz):** δ 7.88 (d, *J* = 7.5 Hz, 2H), 7.62 – 7.54 (m, 6H), 7.51 (t, *J* = 7.6 Hz, 2H), 7.34 (d, *J* = 3.9 Hz, 1H). **<sup>13</sup>C NMR (CDCl<sub>3</sub>, 125 MHz):** δ 187.9, 151.6, 142.6, 137.9, 135.9, 132.3, 132.2, 129.1, 128.5, 127.7, 124.1, 123.2. **HRMS (ESI):** Calcd for C<sub>17</sub>H<sub>12</sub>BrOS [M+H]<sup>+</sup> 342.9787 and 344.9766, found: 342.9791 and 344.9769.

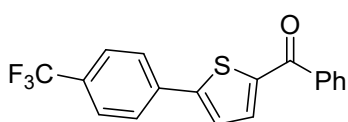

**phenyl(5-(4-(trifluoromethyl)phenyl)thiophen-2-yl)methanone (3ha)**

The title compound was isolated by column chromatography (eluent: EtOAc/petroleum ether = 1/20) as a white solid in 69% yield (45.8 mg, 0.138 mmol). Mp: 161 – 162 °C. **<sup>1</sup>H NMR (CDCl<sub>3</sub>, 500 MHz):** δ 7.89 (d, *J* = 7.1 Hz, 2H), 7.79 (d, *J* = 8.2 Hz, 2H), 7.69 (d, *J* = 8.3 Hz, 2H), 7.65 – 7.58 (m, 2H), 7.52 (t, *J* = 7.6 Hz, 2H), 7.43 (d, *J* = 3.9 Hz, 1H). **<sup>13</sup>C NMR (CDCl<sub>3</sub>, 125 MHz):** δ 187.9, 150.7, 143.5, 137.7, 136.6, 135.7, 132.4, 130.7 (q, *J* = 33.1 Hz), 129.1, 128.5, 126.5, 126.1 (q, *J* = 3.7 Hz), 125.0, 123.9 (q, *J* = 271.8 Hz). **<sup>19</sup>F NMR (CDCl<sub>3</sub>, 471 MHz):** δ -62.7. **HRMS (ESI):** Calcd for C<sub>18</sub>H<sub>11</sub>F<sub>3</sub>NaOS [M+Na]<sup>+</sup> 355.0375, found: 355.0370.

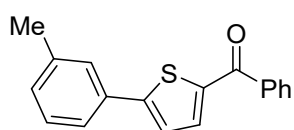

**phenyl(5-(*m*-tolyl)thiophen-2-yl)methanone (3ia)<sup>[5]</sup>**

The title compound was isolated by column chromatography (eluent: EtOAc/petroleum ether = 1/20) as a white solid in 79% yield (43.9 mg, 0.158 mmol). Mp: 138 – 139 °C. **<sup>1</sup>H NMR (CDCl<sub>3</sub>, 500 MHz):** δ 7.88 (d, *J* = 7.0 Hz, 2H), 7.62 – 7.58 (m, 2H), 7.53 – 7.49 (m, 4H), 7.35 – 7.30 (m, 2H), 7.20 (d, *J* = 7.6 Hz, 1H), 2.42 (s, 3H). **<sup>13</sup>C NMR (CDCl<sub>3</sub>, 125 MHz):** δ 188.0, 153.4, 142.0, 138.8, 138.1, 135.9, 133.2, 132.1, 129.9, 129.0, 129.0, 128.4, 127.0, 123.7, 123.4, 21.4.

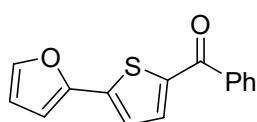

**(5-(furan-2-yl)thiophen-2-yl)(phenyl)methanone (3ja)**

The title compound was isolated by column chromatography (eluent: EtOAc/petroleum ether = 1/20) as a white solid in 74% yield (37.6 mg, 0.148 mmol). Mp: 94 – 95 °C. **<sup>1</sup>H NMR (CDCl<sub>3</sub>, 500 MHz):** δ 7.86 (d, *J* = 7.1 Hz, 2H), 7.61 – 7.56 (m, 2H), 7.52 – 7.49 (m, 3H), 7.28 (d, *J* = 4.0 Hz, 1H), 6.73 (d, *J* = 3.4 Hz, 1H), 6.51 (dd, *J* = 3.4, 1.8 Hz, 1H). **<sup>13</sup>C NMR (CDCl<sub>3</sub>, 125 MHz):** δ 187.9, 148.5, 143.2, 141.9, 141.4, 138.1, 135.7, 132.2, 129.0, 128.4, 122.8, 112.2, 108.2. **HRMS (ESI):** Calcd for C<sub>15</sub>H<sub>10</sub>NaO<sub>2</sub>S [M+Na]<sup>+</sup> 277.0294, found: 277.0291.

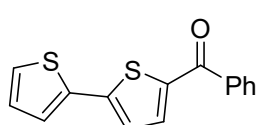

**[2,2'-bithiophen]-5-yl(phenyl)methanone (3ka)<sup>[4]</sup>**

The title compound was isolated by column chromatography (eluent: EtOAc/petroleum ether = 1/20) as a white solid in 78% yield (42.1 mg, 0.156 mmol). Mp: 128 – 129 °C. **<sup>1</sup>H NMR (CDCl<sub>3</sub>, 500 MHz):** δ 7.86 (d, *J* = 7.2 Hz, 2H), 7.59 (t, *J* = 7.4 Hz, 1H), 7.54 (d, *J* = 4.0 Hz, 1H), 7.50 (t, *J* = 7.6 Hz, 2H), 7.34 (dd, *J* = 8.3, 4.3 Hz, 2H), 7.20 (d, *J* = 4.0 Hz, 1H), 7.07 (dd, *J* = 5.0, 3.7 Hz, 1H). **<sup>13</sup>C NMR (CDCl<sub>3</sub>, 125 MHz):** δ 187.8, 146.2, 141.5, 138.0, 136.3, 135.8, 132.2, 129.0, 128.4, 128.3, 126.6, 125.7, 124.1.

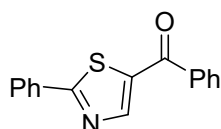

**phenyl(2-phenylthiazol-5-yl)methanone (10aa)<sup>[5]</sup>**

The title compound was isolated by column chromatography (eluent: EtOAc/petroleum ether = 1/20) as a white solid in 76% yield (42.3 mg, 0.152 mmol). **<sup>1</sup>H NMR (CDCl<sub>3</sub>, 500 MHz):** δ 8.28 (s, 1H), 8.05 (d, *J* = 7.3 Hz, 2H), 7.91 (d, *J* = 7.4 Hz, 2H), 7.64 (t, *J* = 7.4 Hz, 1H), 7.54 (t, *J* = 7.7 Hz, 2H), 7.52 – 7.48 (m, 3H). **<sup>13</sup>C NMR (CDCl<sub>3</sub>, 125 MHz):** δ 187.3, 174.5, 149.7, 138.8, 137.7, 132.9, 132.9, 131.5, 129.2, 129.1, 128.7, 127.1.

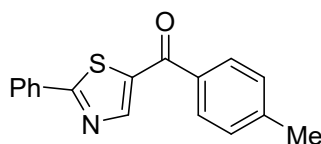

**(2-phenylthiazol-5-yl)(*p*-tolyl)methanone (10ab)**

The title compound was isolated by column chromatography (eluent: EtOAc/petroleum ether = 1/20) as a white solid in 77% yield (43.0 mg, 0.154 mmol). Mp: 133 – 134 °C. **<sup>1</sup>H NMR (CDCl<sub>3</sub>, 500 MHz):** δ 8.28 (s, 1H), 8.03 (d, *J* = 6.6 Hz, 2H), 7.83 (d, *J* = 7.9 Hz, 2H), 7.49 – 7.48 (m, 3H), 7.33 (d, *J* = 7.8 Hz,

2H), 2.46 (s, 3H). **<sup>13</sup>C NMR (CDCl<sub>3</sub>, 125 MHz):** δ 186.9, 174.1, 149.4, 143.8, 138.9, 135.0, 132.9, 131.3, 129.4, 129.2, 129.1, 127.0, 21.6. **HRMS (ESI):** Calcd for C<sub>17</sub>H<sub>14</sub>NOS [M+H]<sup>+</sup> 280.0791, found: 280.0785.

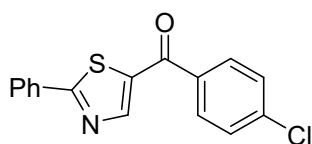

**(4-chlorophenyl)(2-phenylthiazol-5-yl)methanone (10ac)<sup>[5]</sup>**

The title compound was isolated by column chromatography (eluent: EtOAc/petroleum ether = 1/20) as a white solid in 65% yield (38.9 mg, 0.130 mmol). **<sup>1</sup>H NMR (CDCl<sub>3</sub>, 500 MHz):** δ 8.26 (s, 1H), 8.04 (d, *J* = 7.7 Hz, 2H), 7.86 (d, *J* = 8.5 Hz, 2H), 7.54 – 7.49 (m, 5H). **<sup>13</sup>C NMR (CDCl<sub>3</sub>, 125 MHz):** δ 186.0, 174.8, 149.7, 139.4, 138.4, 136.0, 132.8, 131.6, 130.4, 129.2, 129.1, 127.1.

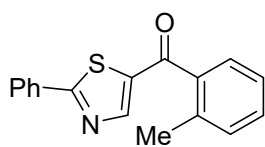

**(2-phenylthiazol-5-yl)(o-tolyl)methanone (10ad)**

The title compound was isolated by column chromatography (eluent: EtOAc/petroleum ether = 1/20) as a white solid in 68% yield (37.9 mg, 0.136 mmol). Mp: 55 – 56 °C. **<sup>1</sup>H NMR (CDCl<sub>3</sub>, 500 MHz):** δ 8.04 – 8.02 (m, 3H), 7.53 – 7.46 (m, 4H), 7.44 (t, *J* = 7.5 Hz, 1H), 7.34 – 7.29 (m, 2H), 2.44 (s, 3H). **<sup>13</sup>C NMR (CDCl<sub>3</sub>, 125 MHz):** δ 189.6, 175.0, 150.6, 140.1, 137.8, 136.9, 132.9, 131.5, 131.4, 130.9, 129.1, 128.2, 127.1, 125.4, 19.8. **HRMS (ESI):** Calcd for C<sub>17</sub>H<sub>14</sub>NOS [M+H]<sup>+</sup> 280.0791, found: 280.0787.

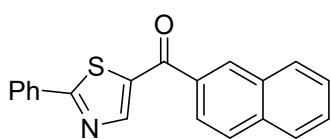

**naphthalen-2-yl(2-phenylthiazol-5-yl)methanone (10ae)**

The title compound was isolated by column chromatography (eluent: EtOAc/petroleum ether = 1/20) as a white solid in 69% yield (43.5 mg, 0.138 mmol). Mp: 82 – 83 °C. **<sup>1</sup>H NMR (CDCl<sub>3</sub>, 500 MHz):** δ 8.27 – 8.25 (m, 1H), 8.10 (s, 1H), 8.07 – 8.04 (m, 3H), 7.95 – 7.92 (m, 1H), 7.82 (d, *J* = 7.1 Hz, 1H), 7.59 – 7.55 (m, 3H), 7.52 – 7.48 (m, 3H). **<sup>13</sup>C NMR (CDCl<sub>3</sub>, 125 MHz):** δ 188.8, 175.1, 150.7, 140.6, 135.5, 133.8, 132.9, 132.1, 131.5, 130.4, 129.2, 128.4, 127.6, 127.5, 127.1, 126.7, 125.3, 124.3. **HRMS (ESI):** Calcd for C<sub>20</sub>H<sub>13</sub>NNaOS [M+Na]<sup>+</sup> 338.0610, found: 338.0605.

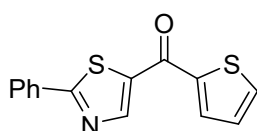

**(2-phenylthiazol-5-yl)(thiophen-2-yl)methanone (10af)**

The title compound was isolated by column chromatography (eluent: EtOAc/petroleum ether = 1/20) as a white solid in 61% yield (33.1 mg, 0.122 mmol). Mp: 95 – 96 °C. **<sup>1</sup>H NMR (CDCl<sub>3</sub>, 500 MHz):** δ 8.53 (s, 1H), 8.03 (d, *J* = 7.9 Hz, 2H), 7.94 (d, *J* = 2.9 Hz, 1H), 7.75 (d, *J* = 4.0 Hz, 1H), 7.52 – 7.47 (m, 3H), 7.24 – 7.21 (m, 1H). **<sup>13</sup>C NMR (CDCl<sub>3</sub>, 125 MHz):** δ 177.8, 173.9, 148.1, 142.7, 138.1, 134.2, 133.2, 132.8, 131.4, 129.2, 128.2, 127.0. **HRMS (ESI):** Calcd for C<sub>14</sub>H<sub>10</sub>NOS<sub>2</sub> [M+H]<sup>+</sup> 272.0198, found: 272.0196.

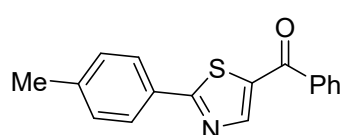

**phenyl(2-(*p*-tolyl)thiazol-5-yl)methanone (10ba)<sup>[6]</sup>**

The title compound was isolated by column chromatography (eluent: EtOAc/petroleum ether = 1/20) as a white solid in 75% yield (41.9 mg, 0.150 mmol). **<sup>1</sup>H NMR (CDCl<sub>3</sub>, 500 MHz):** δ 8.25 (s, 1H), 7.92 (dd, *J* = 12.9, 7.8 Hz, 4H), 7.64 (t, *J* = 7.4 Hz, 1H), 7.54 (t, *J* = 7.7 Hz, 2H), 7.29 (d, *J* = 8.1 Hz, 2H), 2.42 (s, 3H). **<sup>13</sup>C NMR (CDCl<sub>3</sub>, 125 MHz):** δ 187.3, 174.7, 149.8, 142.1, 138.4, 137.8, 132.8, 130.3, 129.9, 129.0, 128.7, 127.0, 21.6.

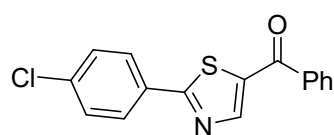

**(2-(4-chlorophenyl)thiazol-5-yl)(phenyl)methanone (10ca)<sup>[7]</sup>**

The title compound was isolated by column chromatography (eluent: EtOAc/petroleum ether = 1/20) as a white solid in 70% yield (41.9 mg, 0.140 mmol). **<sup>1</sup>H NMR (CDCl<sub>3</sub>, 500 MHz):** δ 8.27 (s, 1H), 7.98 (d, *J* = 8.5 Hz, 2H), 7.91 (d, *J* = 7.2 Hz, 2H), 7.65 (t, *J* = 7.4 Hz, 1H), 7.54 (t, *J* = 7.7 Hz, 2H), 7.47 (d, *J* = 8.5 Hz, 2H). **<sup>13</sup>C NMR (CDCl<sub>3</sub>, 125 MHz):** δ 187.2, 173.0, 149.7, 139.1, 137.6, 132.0, 131.4, 129.5, 129.1, 128.8, 128.3.

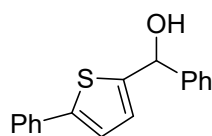

**phenyl(5-phenylthiophen-2-yl)methanol (11)<sup>[8]</sup>**

The title compound was isolated by column chromatography (eluent: EtOAc/petroleum ether = 1/20) as a white solid in 90% yield (47.9 mg, 0.180 mmol). Mp: 90 – 91 °C. **<sup>1</sup>H NMR (CDCl<sub>3</sub>, 500 MHz):** δ 7.57 (d, *J* = 7.3 Hz, 2H), 7.50 (d, *J* = 7.4 Hz, 2H), 7.43 – 7.34 (m, 5H), 7.28 (t, *J* = 7.4 Hz, 1H), 7.15 (d, *J* = 3.7 Hz, 1H), 6.86 (d, *J* = 3.6 Hz, 1H), 6.03 (s, 1H), 2.65 (s, 1H). **<sup>13</sup>C NMR (CDCl<sub>3</sub>, 125 MHz):** δ 147.4, 144.4, 142.9, 134.3, 128.8, 128.5, 128.0, 127.4, 126.3, 125.8, 125.7, 122.5, 72.5.

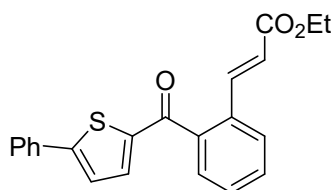

**ethyl (*E*)-3-(2-(5-phenylthiophene-2-carbonyl)phenyl)acrylate**  
**(13)**

The title compound was isolated by column chromatography (eluent: EtOAc/petroleum ether = 1/20) as a white solid in 77% yield (55.8 mg, 0.154 mmol). Mp: 104 – 105 °C. **<sup>1</sup>H NMR (CDCl<sub>3</sub>, 500 MHz):** δ 7.86 (d, *J* = 15.9 Hz, 1H), 7.74 (d, *J* = 7.8 Hz, 1H), 7.68 (d, *J* = 7.3 Hz, 2H), 7.58 (d, *J* = 7.5 Hz, 1H), 7.54 (t, *J* = 7.2 Hz, 1H), 7.47 (t, *J* = 7.5 Hz, 1H), 7.45 – 7.38 (m, 4H), 7.31 (d, *J* = 4.0 Hz, 1H), 6.41 (d, *J* = 15.9 Hz, 1H), 4.21 (q, *J* = 7.1 Hz, 2H), 1.29 (d, *J* = 7.1 Hz, 3H). **<sup>13</sup>C NMR (CDCl<sub>3</sub>, 125 MHz):** δ 188.7, 166.3, 154.6, 142.9, 141.4, 139.2, 137.0, 133.5, 133.1, 130.7, 129.3, 129.1, 128.7, 127.2, 126.4, 124.1, 121.0, 99.9, 60.5, 14.2. **HRMS (ESI):** Calcd for C<sub>22</sub>H<sub>18</sub>NaO<sub>3</sub>S [M+Na]<sup>+</sup> 385.0869, found: 385.0867.

## 5. X-ray Crystallography of 3ak

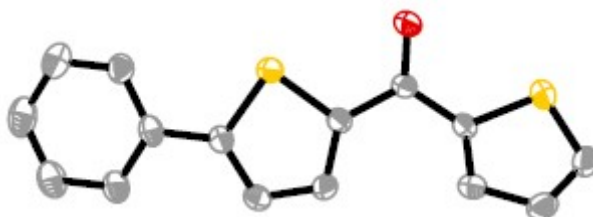

**Figure S1.** The molecular structure of **3ak**

### Crystal preparation of compound 3ak.

Compound **3ak** (25 mg) was dissolved in 5 mL of dichloromethane/*n*-hexane (v1/v2 = 1:1), and it was crystallized to give crystal as colorless prisms after the solvent was slowly volatilized in 4 days at room temperature (~ 25 °C).

CCDC-2550631 (**3ak**), contain the supplementary crystallographic data. These data can be obtained free of charge from the Cambridge Crystallographic Data Centre (<http://www.ccdc.cam.ac.uk/>). Thermal ellipsoids are shown at the 30% level. Hydrogen atoms have been omitted for clarity. X-ray crystallographic data for **3ak** is available as Figure S1.

### Table S2. Crystal Data and Summary of X-ray Data Collection for 3ak

|                   |                                                  |
|-------------------|--------------------------------------------------|
| Empirical formula | C <sub>15</sub> H <sub>10</sub> O S <sub>2</sub> |
| Formula weight    | 270.35                                           |
| Temperature       | 298.15 K                                         |

|                                   |                                                                                                                 |
|-----------------------------------|-----------------------------------------------------------------------------------------------------------------|
| Wavelength                        | 0.71076 Å                                                                                                       |
| Crystal system, space group       | orthorhombic, P2 <sub>1</sub> /n                                                                                |
| Unit cell dimensions              | a = 14.2801(13) Å    alpha = 90 deg.<br>b = 6.3292(6) Å    beta = 90 deg.<br>c = 27.955(2) Å    gamma = 90 deg. |
| Volume                            | 2526.6(4) Å <sup>3</sup>                                                                                        |
| Z, Calculated density             | 8, 1.421 Mg/m <sup>3</sup>                                                                                      |
| Absorption coefficient            | 0.404 mm <sup>-1</sup>                                                                                          |
| F(000)                            | 1120                                                                                                            |
| Crystal size                      | 0.2×0.3×0.4 mm <sup>3</sup>                                                                                     |
| Crystal colour                    | clear light colourless                                                                                          |
| Crystal shape                     | block                                                                                                           |
| Theta range for data collection   | 5.71 to 66.34 deg.                                                                                              |
| Limiting indices                  | -21 ≤ h ≤ 21, -7 ≤ k ≤ 9, -38 ≤ l ≤ 43                                                                          |
| Reflections collected / unique    | 38753 / 9458 [R(int) = 0.0805]                                                                                  |
| Max. and min. transmission        | 0.6355 and 0.7465                                                                                               |
| Data / restraints / parameters    | 9458 / 1 / 326                                                                                                  |
| Goodness-of-fit on F <sup>2</sup> | 1.036                                                                                                           |
| Final R indices [I > 2σ(I)]       | R1 = 0.0513, wR2 = 0.0871                                                                                       |
| R indices (all data)              | R1 = 0.1461, wR2 = 0.1092                                                                                       |
| Largest diff. peak and hole       | 0.18 and -0.28 e.Å <sup>-3</sup>                                                                                |
| Flack X parameter                 | -0.02(8)                                                                                                        |

## 6. Experiments on the Mechanism and Reactivity Trends of Different Substrates

### (a) Free Radical Interference Experiment

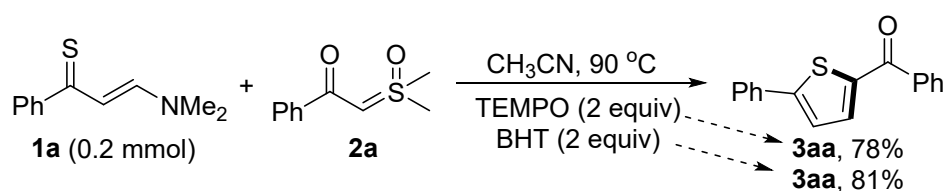

A mixture of (*E*)-3-(dimethylamino)-1-phenylprop-2-ene-1-thione (**1a**) (0.2 mmol, 1.0 equiv), 2-(dimethyl(oxo)-λ<sup>6</sup>-sulfaneylidene)-1-phenylethan-1-one (**2a**) (0.3 mmol, 1.5 equiv), and 2 equiv of TEMPO (or BHT) were weighed in a Schlenk tube equipped with a stir bar. Dry CH<sub>3</sub>CN (1.5 mL) was added and the mixture was stirred at 90 °C in a pre-heated oil bath for 12 h under air. Then, the mixture was cooled to room temperature and concentrated in vacuo and the resulting residue was purified by flash column chromatography on silica gel

with EtOAc/petroleum ether, the product **3aa** was afforded as a yellow solid in 78% (or 81%) yield.

**(b) Competition Experiment of 1c and 1h**

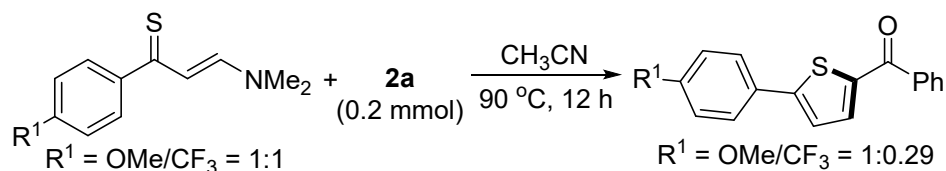

A mixture of (*E*)-3-(dimethylamino)-1-(4-methoxyphenyl)prop-2-ene-1-thione (**1c**) (44.2 mg, 0.2 mmol, 1.0 equiv), (*E*)-3-(dimethylamino)-1-(4-(trifluoromethyl)phenyl)prop-2-ene-1-thione (**1h**) (51.8 mg, 0.2 mmol, 1.0 equiv), and 2-(dimethyl(oxo)-λ<sup>6</sup>-sulfaneylidene)-1-phenylethan-1-one (**2a**) (39.2 mg, 0.2 mmol, 1.0 equiv) were weighted in a Schlenk tube equipped with a stir bar. Dry CH<sub>3</sub>CN (1.5 mL) were added and the mixture was stirred at 90 °C in a pre-heated oil bath for 12 h under air. Then, the mixture was cooled to room temperature and concentrated in vacuo and the resulting residue was purified by flash column chromatography on silica gel with EtOAc/petroleum ether to give a mixture of products **3ca** and **3ha** at a ratio of 1:0.29.

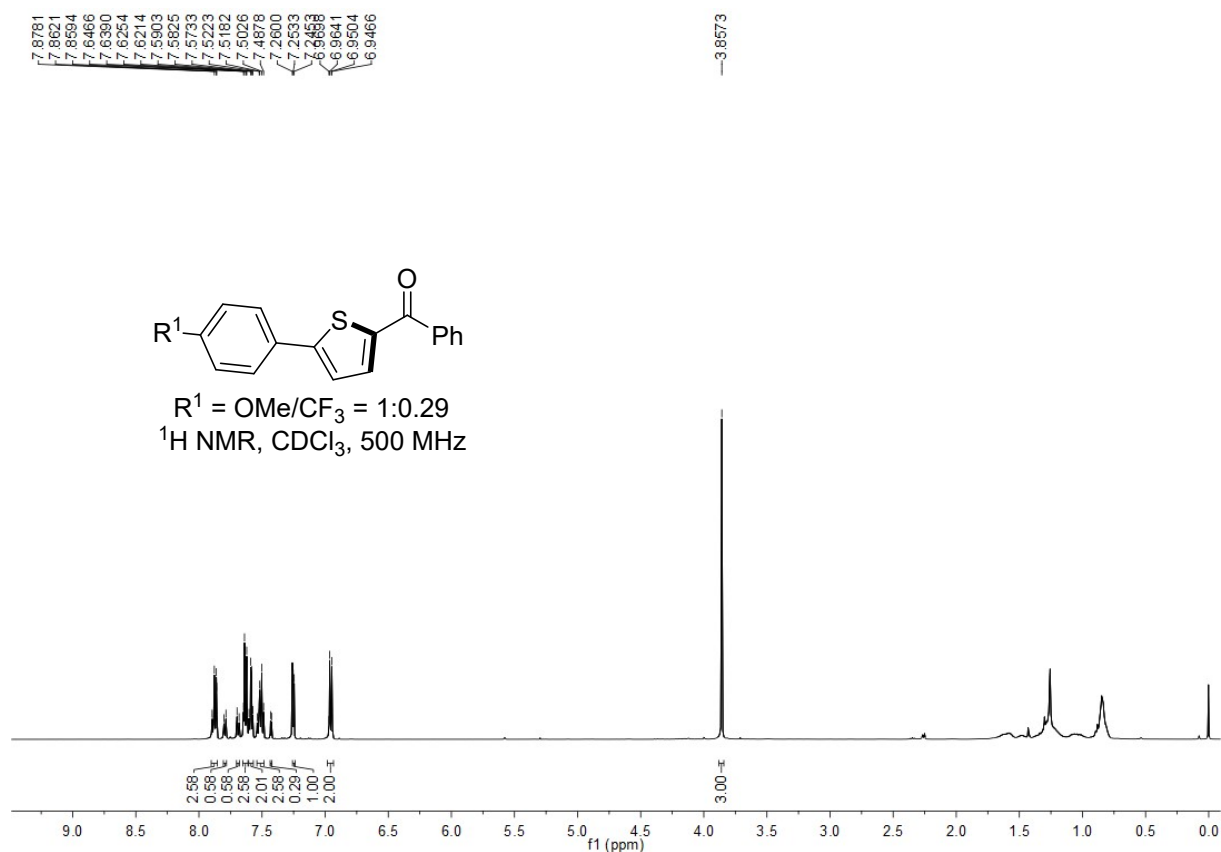

### (c) Competition Experiment of **2c** and **2g**

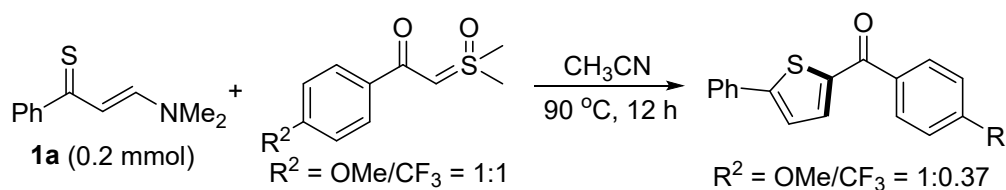

A mixture of (*E*)-3-(dimethylamino)-1-phenylprop-2-ene-1-thione (**1a**) (38.2 mg, 0.2 mmol, 1.0 equiv), 2-(dimethyl(oxo)- $\lambda^6$ -sulfanylidene)-1-(4-methoxyphenyl)ethan-1-one (**2c**) (45.2 mg, 0.2 mmol, 1.0 equiv), and 2-(dimethyl(oxo)- $\lambda^6$ -sulfanylidene)-1-(4-(trifluoromethyl)phenyl)ethan-1-one (**2g**) (52.8 mg, 0.2 mmol, 1.0 equiv) were weighed in a Schlenk tube equipped with a stir bar. Dry  $\text{CH}_3\text{CN}$  (1.5 mL) were added and the mixture was stirred at 90 °C in a pre-heated oil bath for 12 h under air. Then, the mixture was cooled to room temperature and concentrated in vacuo and the resulting residue was purified by flash column chromatography on silica gel with EtOAc/petroleum ether to give a mixture of products **3ac** and **3ag** at a ratio of 1:0.37.

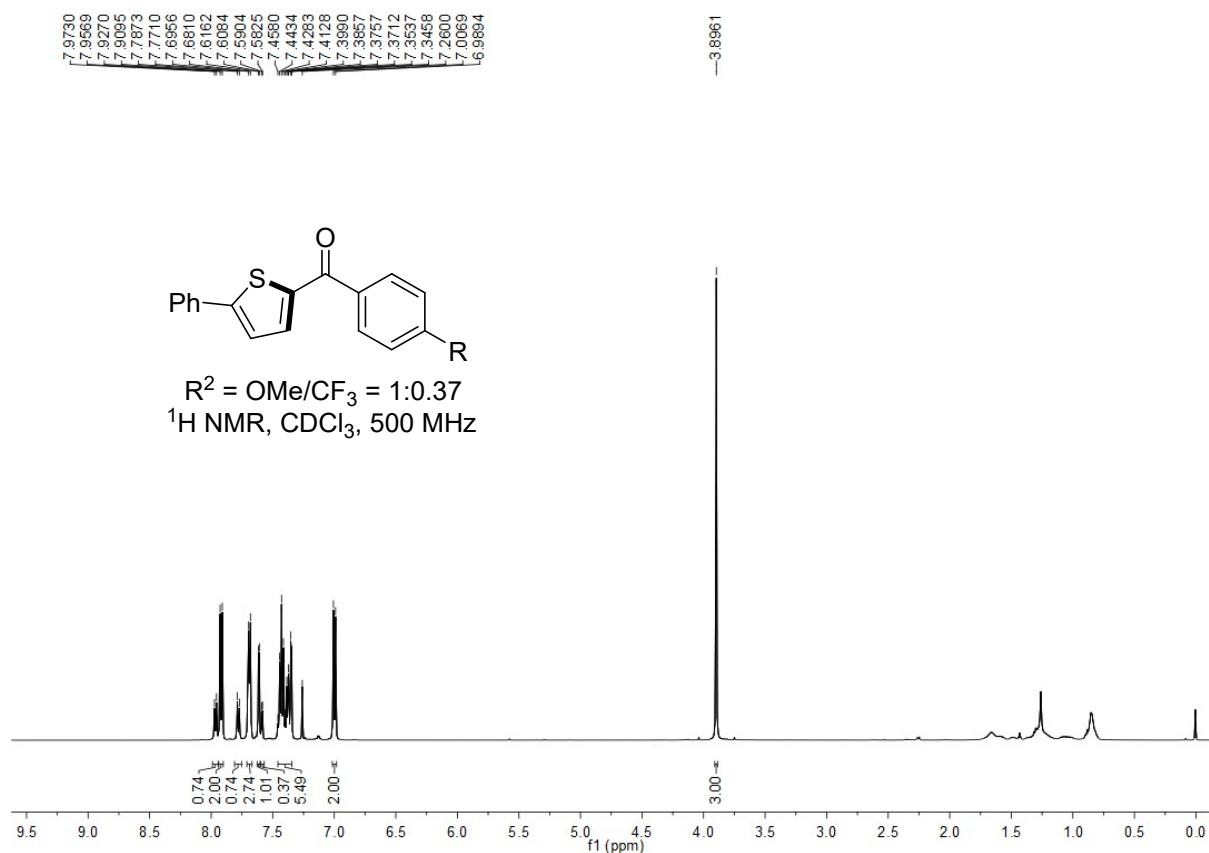

### (d) Detection of Intermediate **B** by ESI-MS

A mixture of (*E*)-3-(dimethylamino)-1-phenylprop-2-ene-1-thione (**1a**) (0.2 mmol, 1.0 equiv), and 2-(dimethyl(oxo)- $\lambda^6$ -sulfaneylidene)-1-phenylethan-1-one (**2a**) (0.3 mmol, 1.5 equiv) were weighted in a Schlenk tube equipped with a stir bar. Dry CH<sub>3</sub>CN (1.5 mL) was added and the mixture was stirred at 90 °C in a pre-heated oil bath for 4 h under air. Then, the mixture was cooled to room temperature and analyzed by ESI-MS. Calcd for C<sub>19</sub>H<sub>19</sub>NOS 309.1, found 309.1.

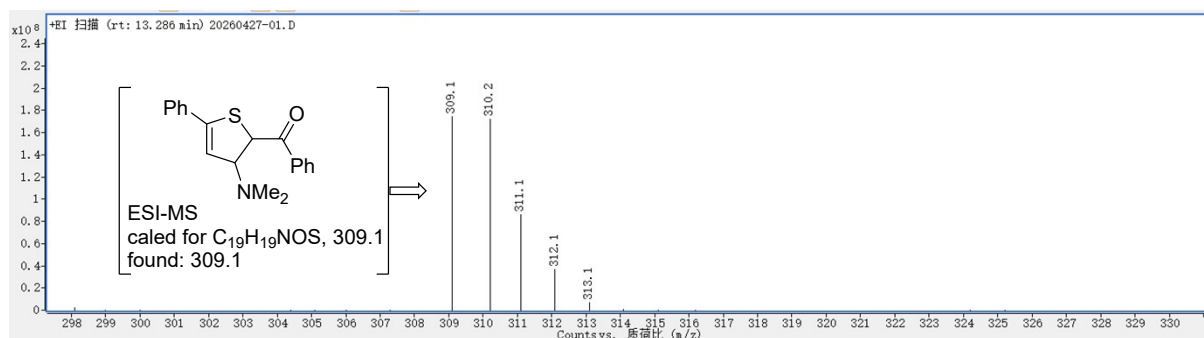

**Figure S2.** ESI-MS spectrum of the reaction mixture

## 7. References:

- [1] J. Zhang, X.-F. Wu, *Org. Lett.* **2023**, *25*, 2162–2166.
- [2] T.-S. Jiang, G.-W. Wang, *Adv. Synth. Catal.* **2014**, *356*, 369–373.
- [3] A. S. Abdelsamie, E. Bey, N. Hanke, M. Empting, R. W. Hartmann, M. Frotscher, *Eur. J. Med. Chem.* **2014**, *82*, 394–406.
- [4] M. L. N. Rao, D. Banerjee, R. J. Dhanorkar, *Synlett* **2011**, 1324–1330.
- [5] Y. Lin, C. M. Seifert, S. M. Kang, J. P. Dusza, S. A. Jr. Lang, *J. Heterocycl. Chem.* **1979**, *16*, 1377–1383.
- [6] J.-C. Meslin, H. Quiniou, *Synthesis* **1974**, *1974*, 298–300.
- [7] F. Luan, M. N. D.S. Cordeiro, N. Alonso, X. García-Mera, O. Caamaño, F. J. Romero-Duran, M. Yañez, H. González-Díaz, *Bioorg. Med. Chem.* **2013**, *21*, 1870–1879.
- [8] A. Xia, X. Qi, X. Mao, X. Wu, X. Yang, R. Zhang, Z. Xiang, Z. Lian, Y. Chen, S. Yang, *Org. Lett.* **2019**, *21*, 3028–3033.

## 8. NMR Spectra

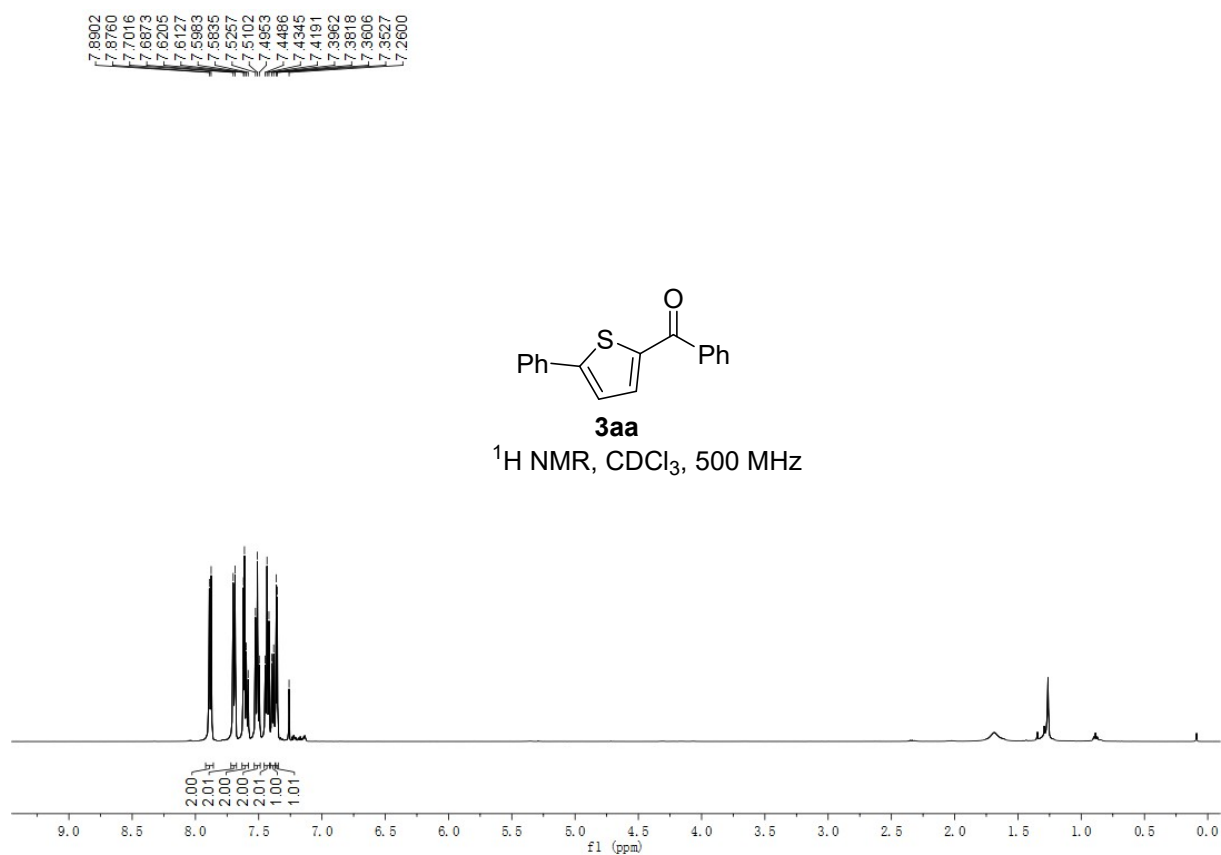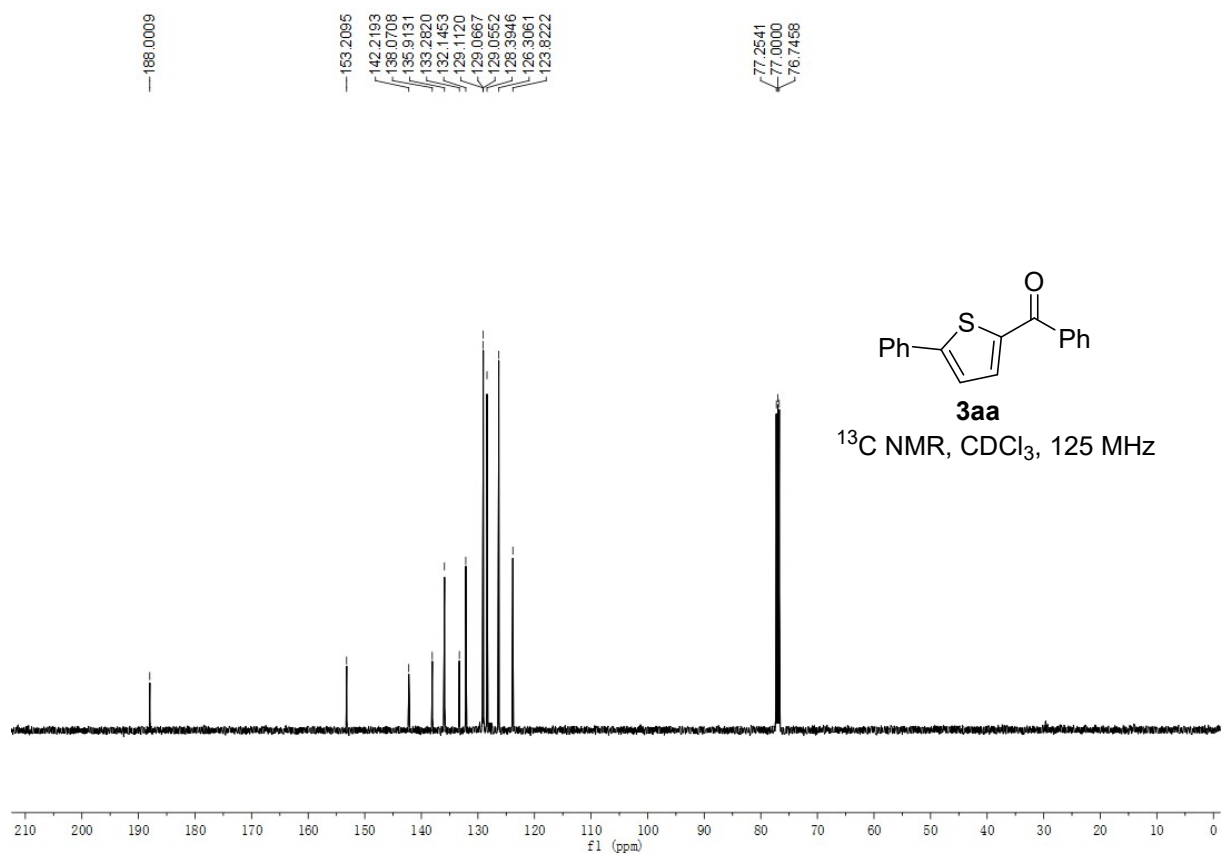

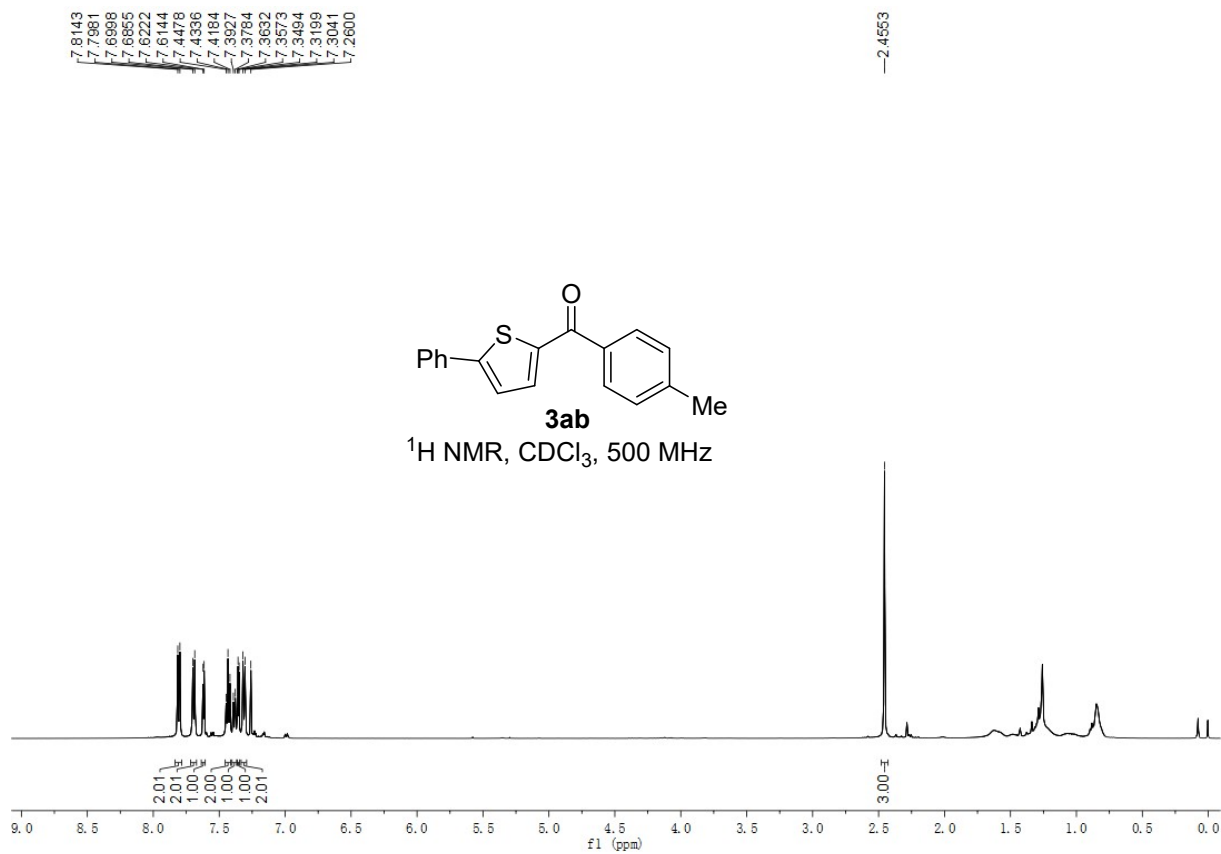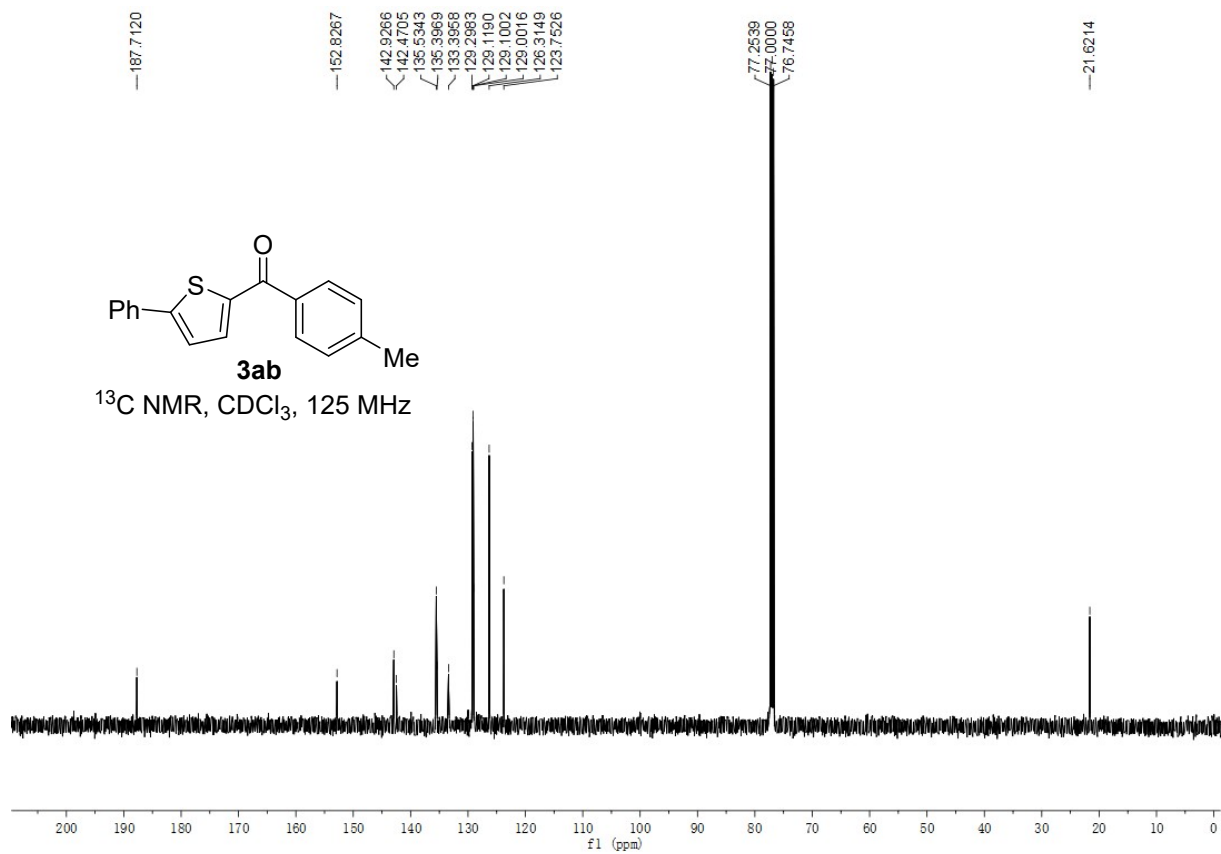

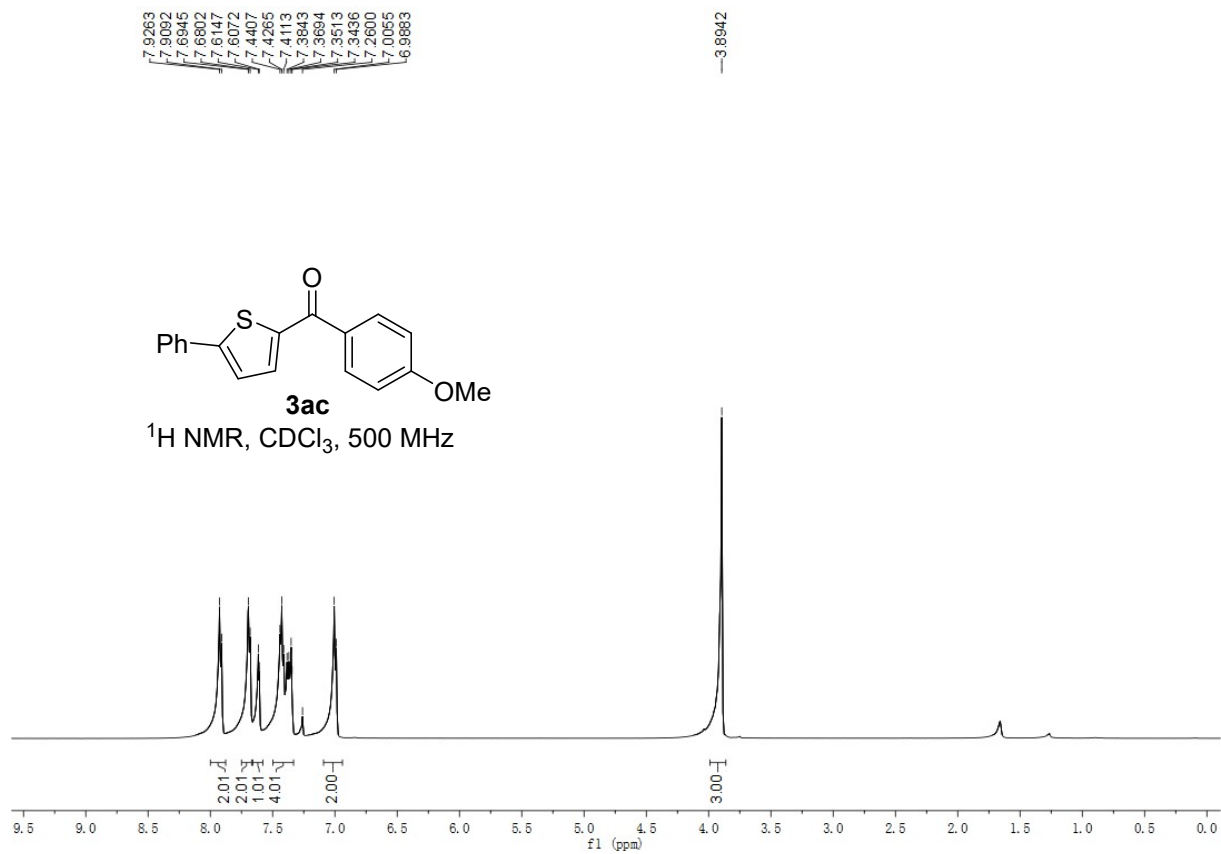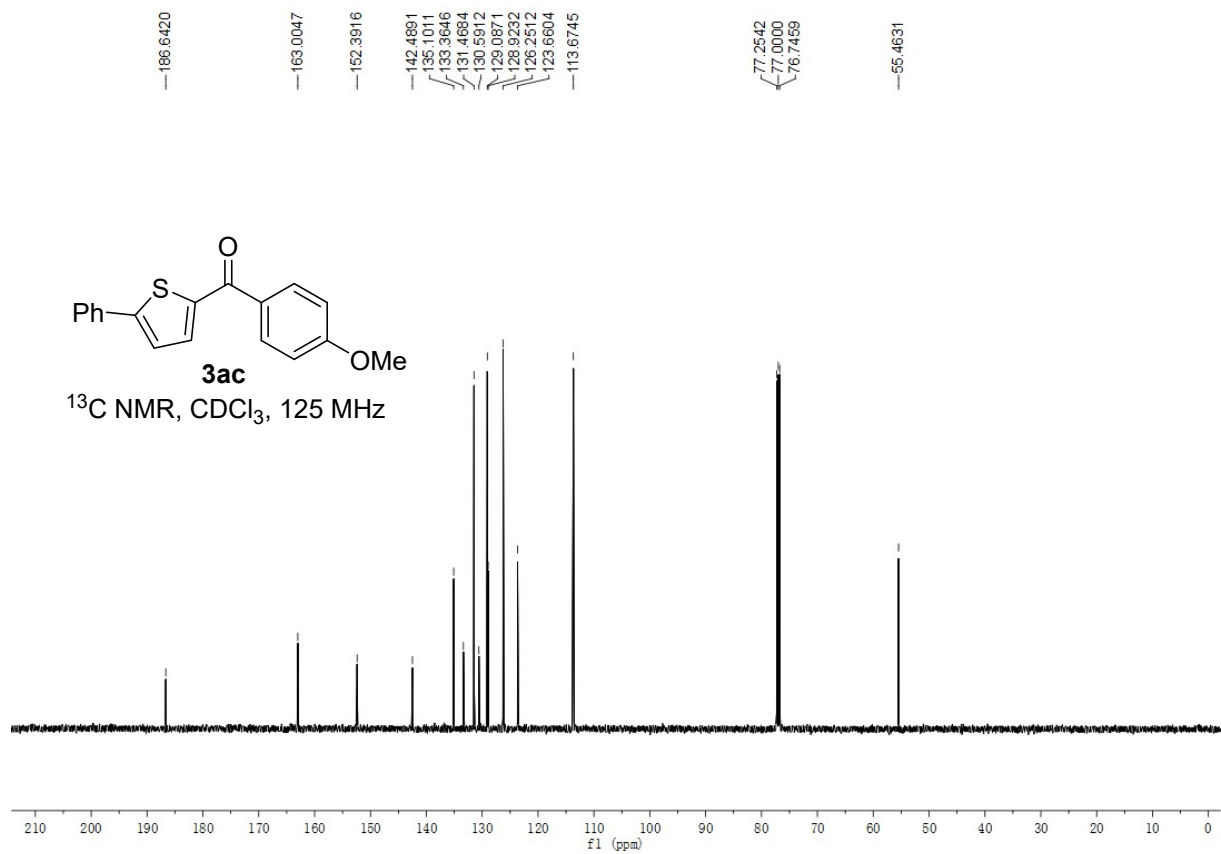

7.9376  
7.9336  
7.9288  
7.9203  
7.9133  
7.9085  
7.7014  
7.6890  
7.6846  
7.6008  
7.5950  
7.4528  
7.4388  
7.4235  
7.4023  
7.3879  
7.3728  
7.3657  
7.3578  
7.2600  
7.2083  
7.1912  
7.1740

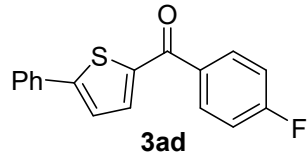

$^1\text{H NMR}$ ,  $\text{CDCl}_3$ , 500 MHz

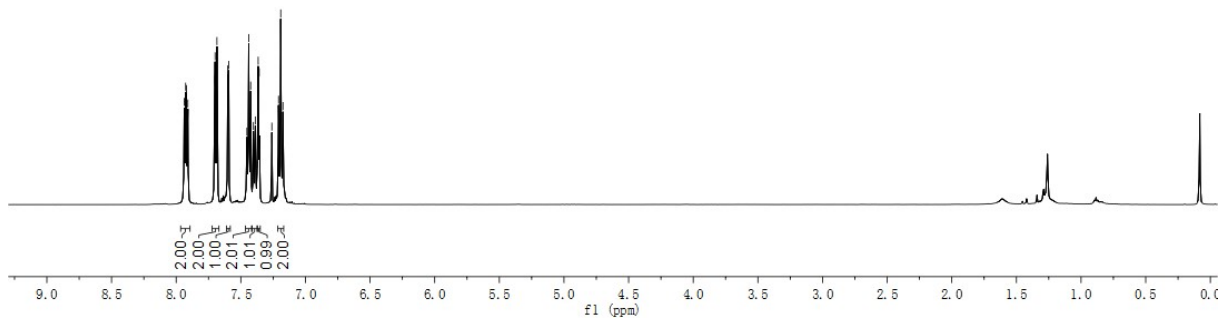

186.4820  
166.2151  
164.1986  
163.3550  
141.9191  
136.7186  
133.1997  
131.6364  
131.5648  
129.1552  
126.3295  
115.8888  
115.4958  
77.2540  
77.0000  
76.7458

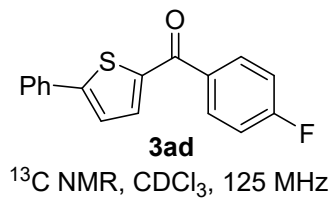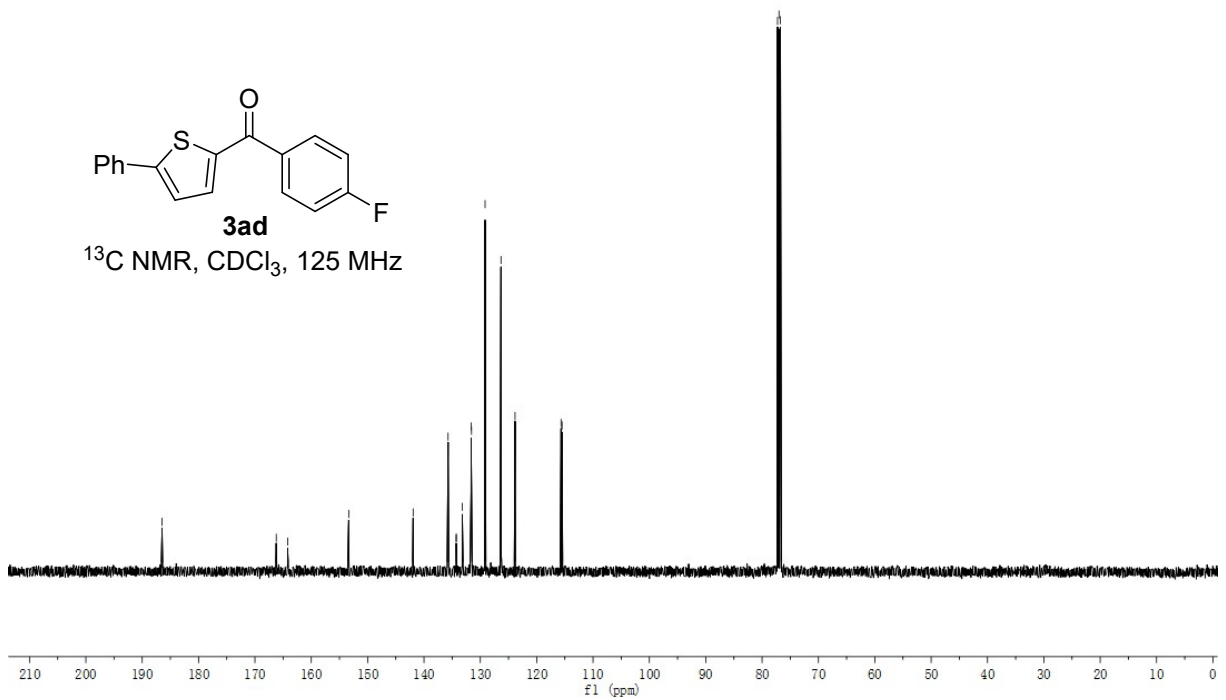

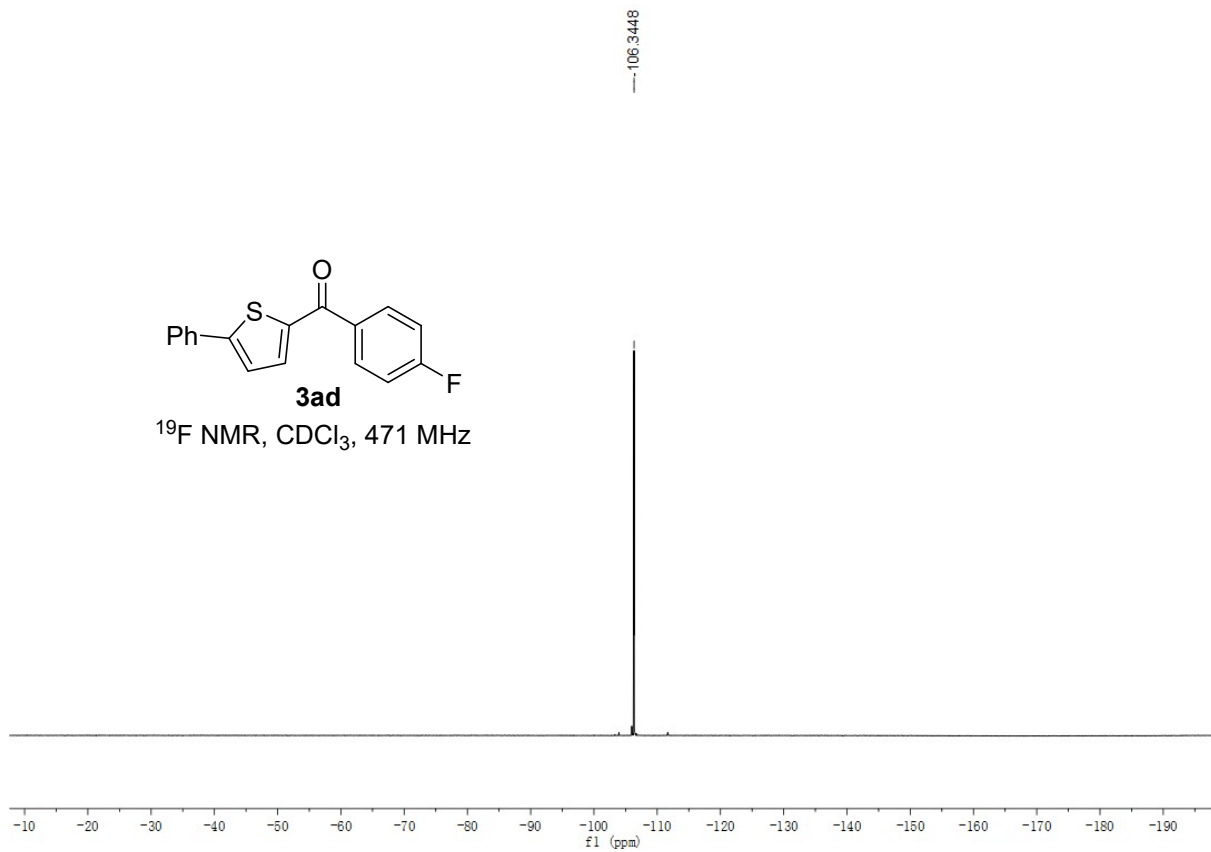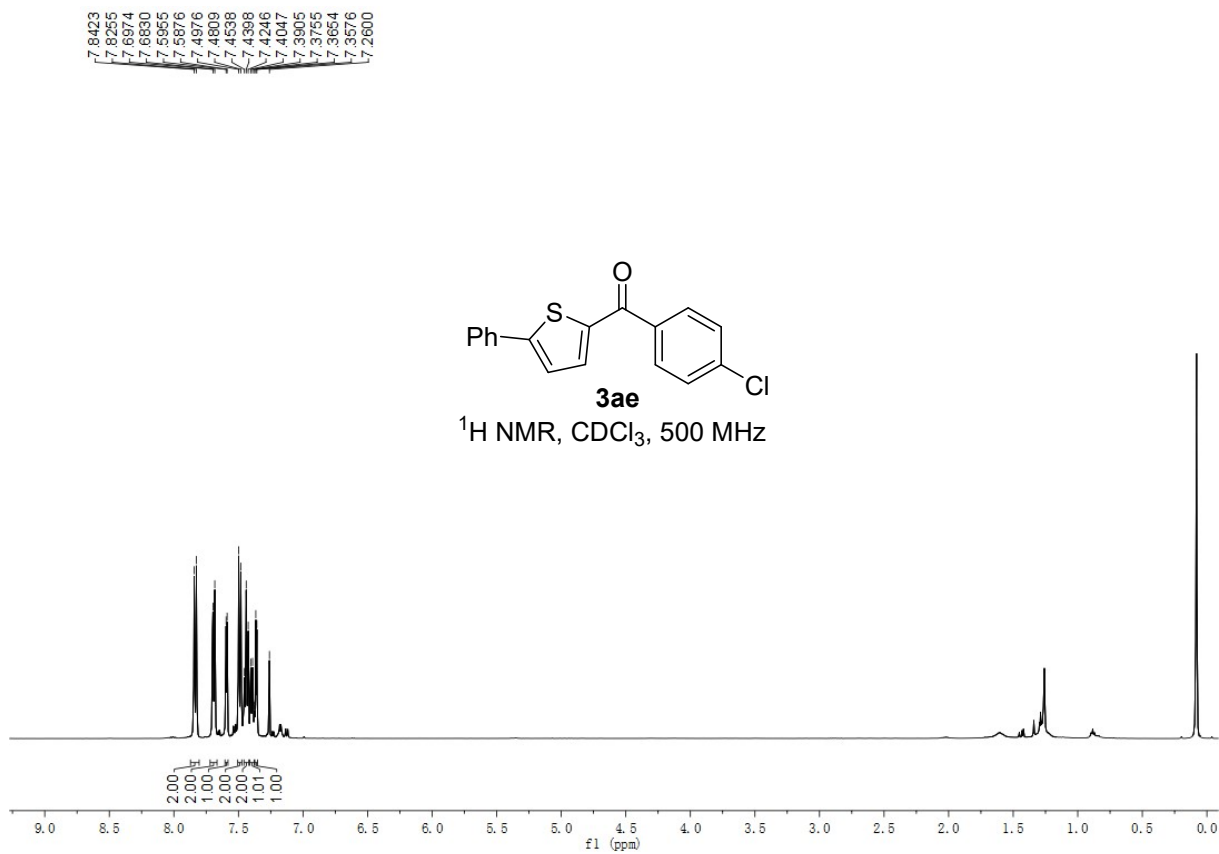

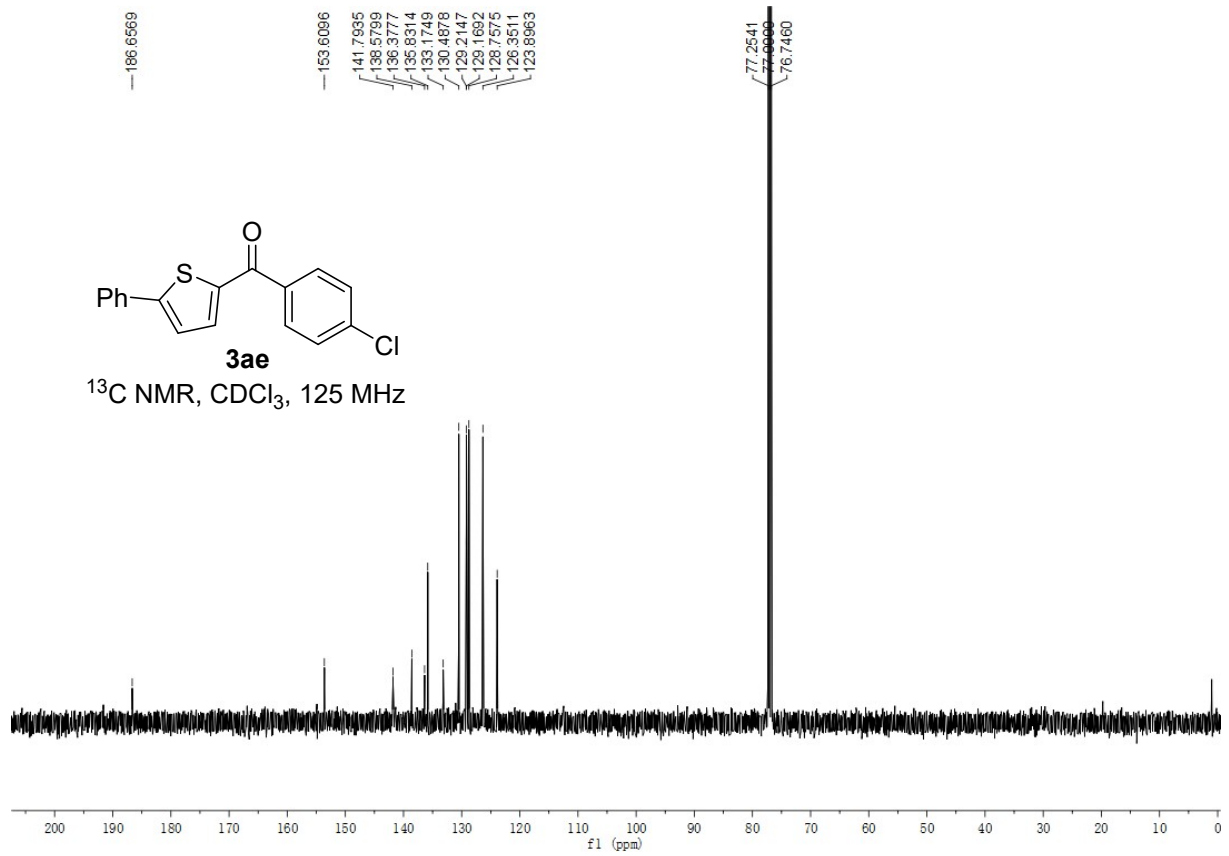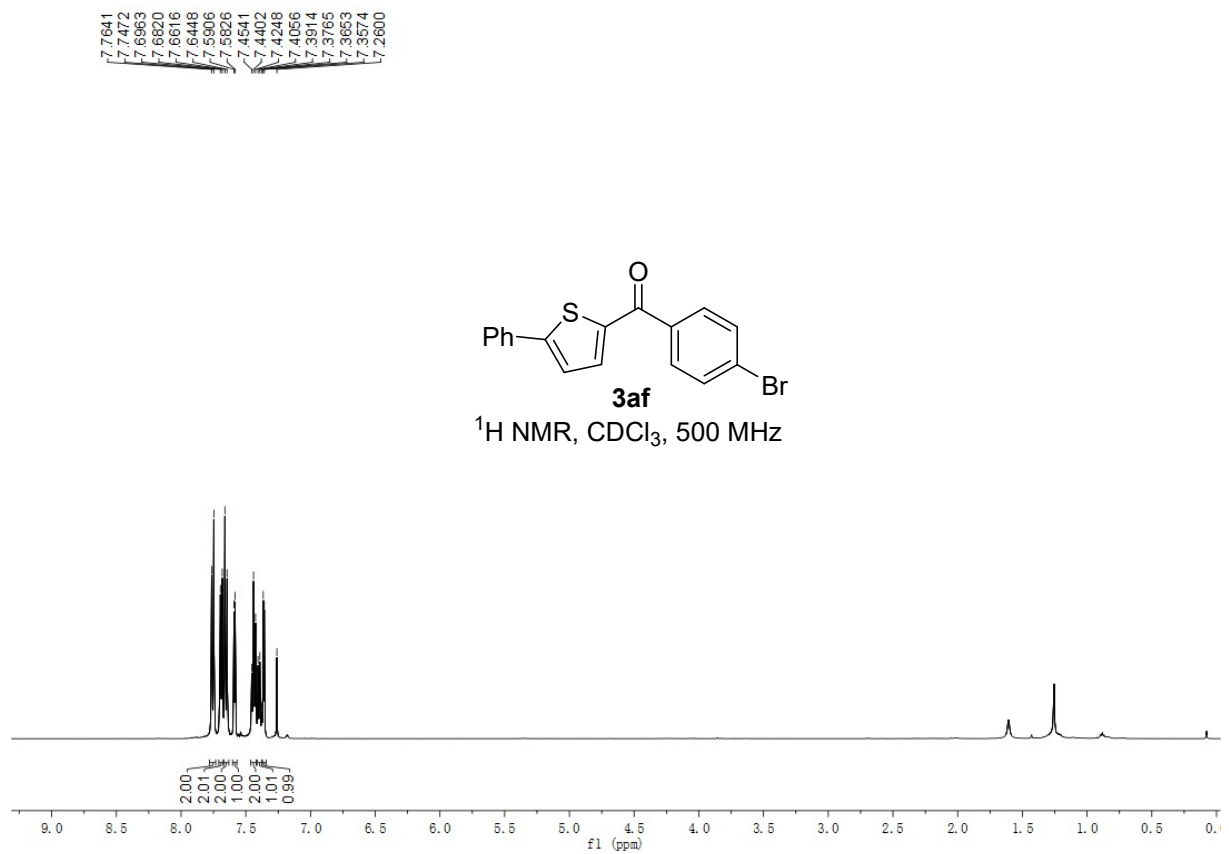

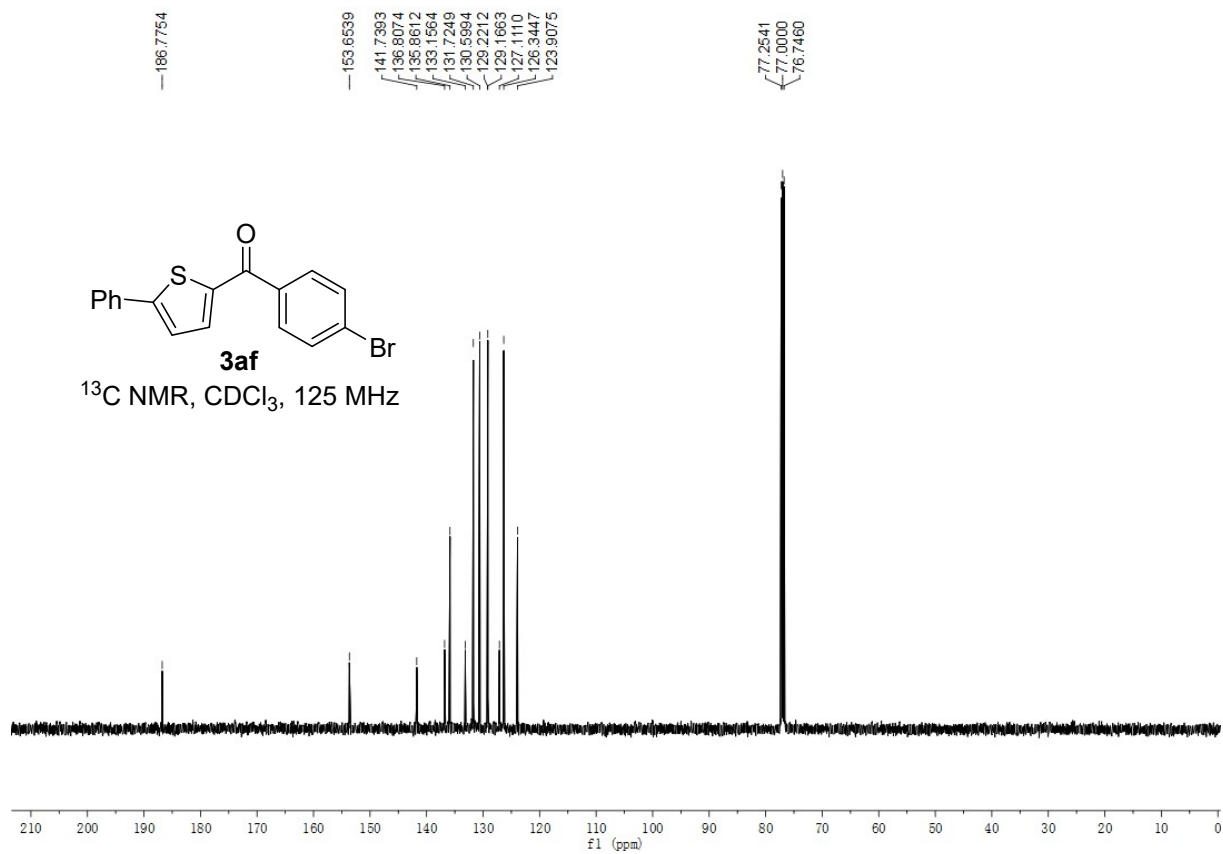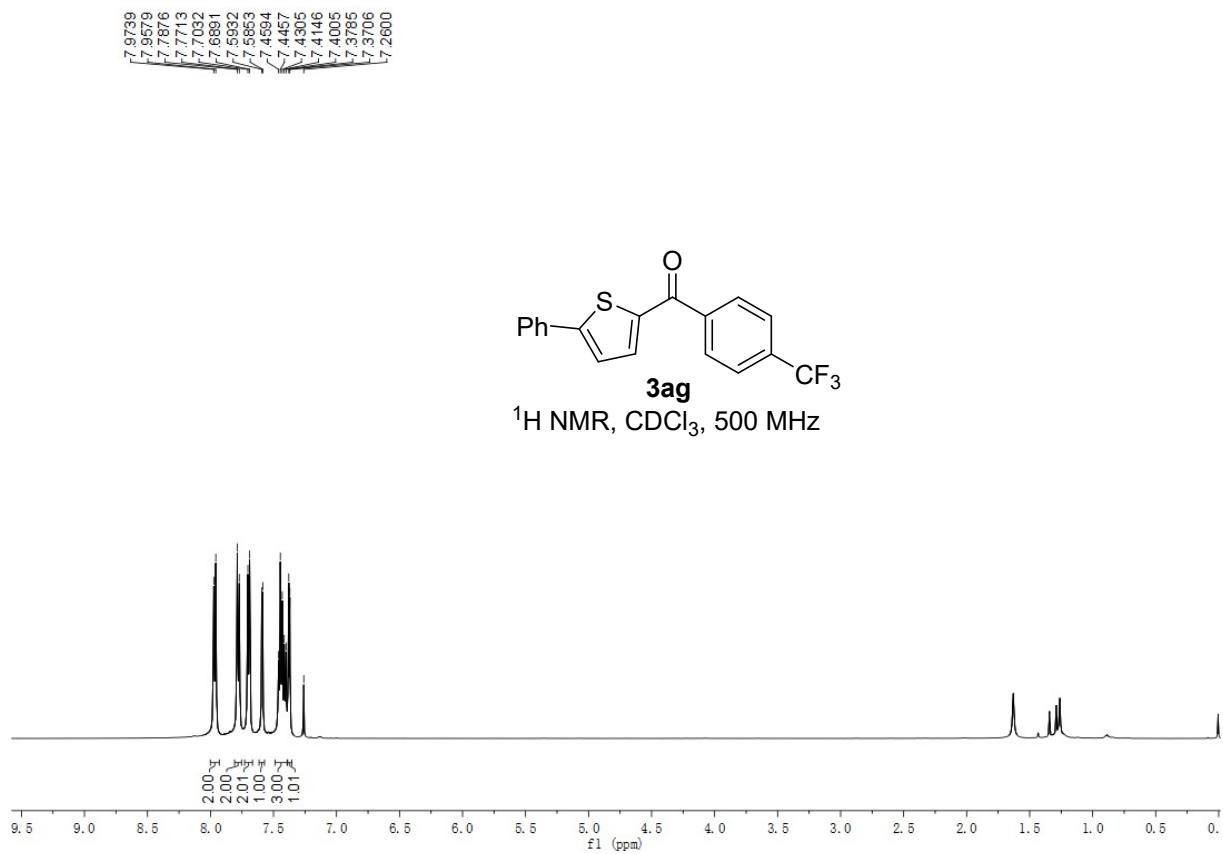

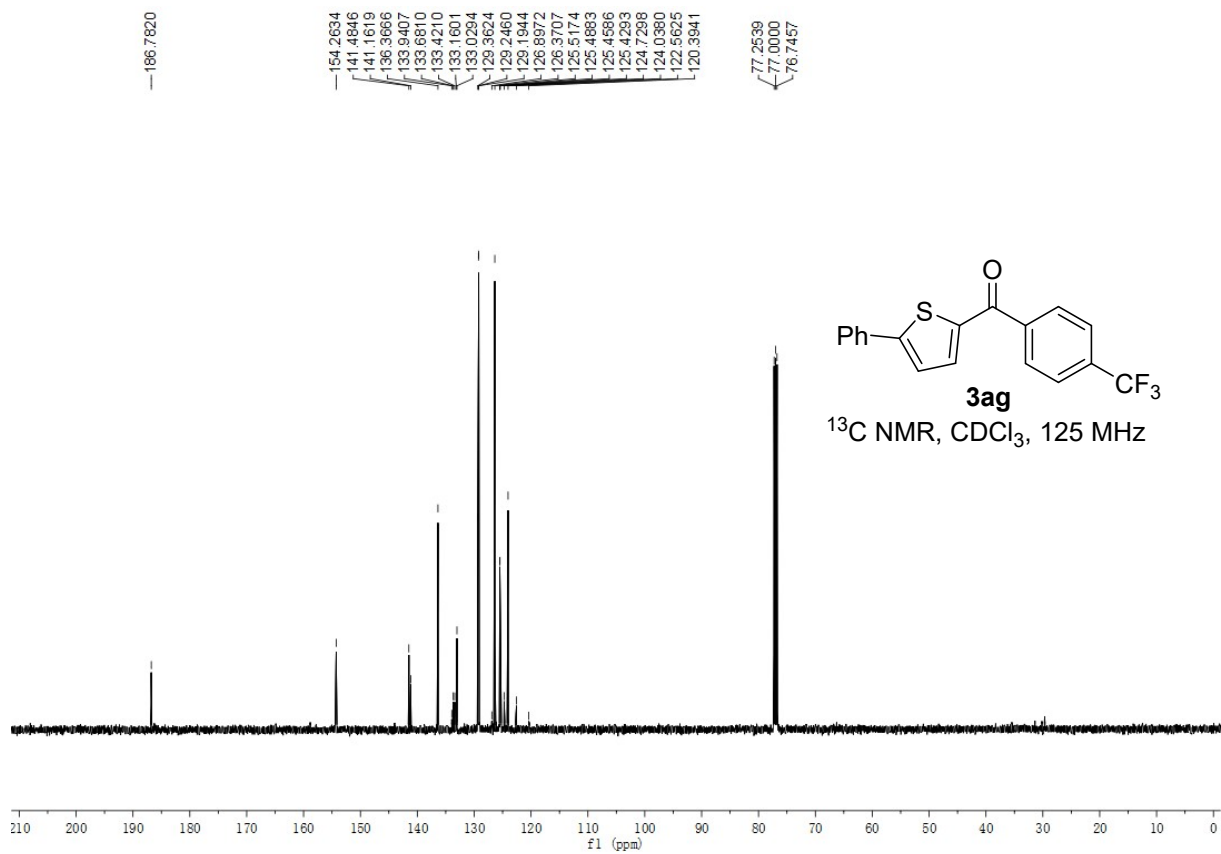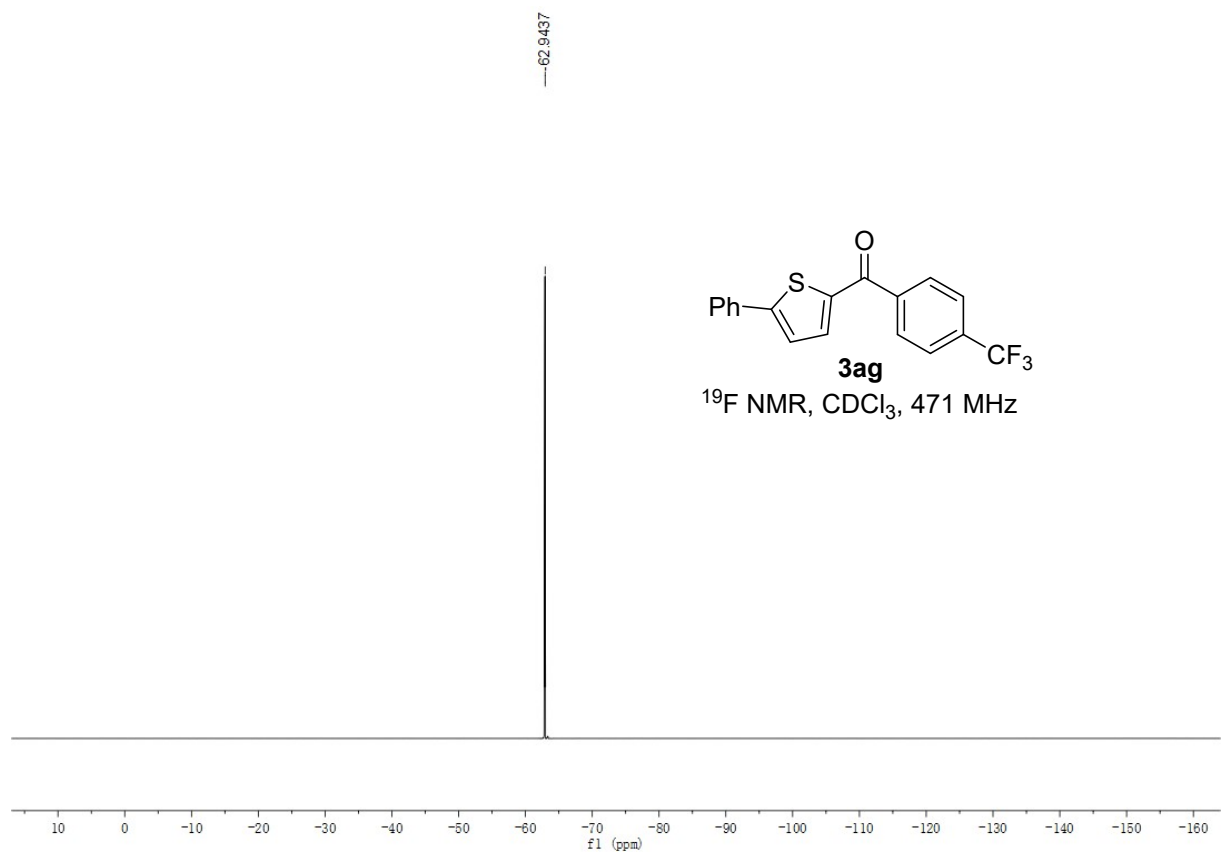

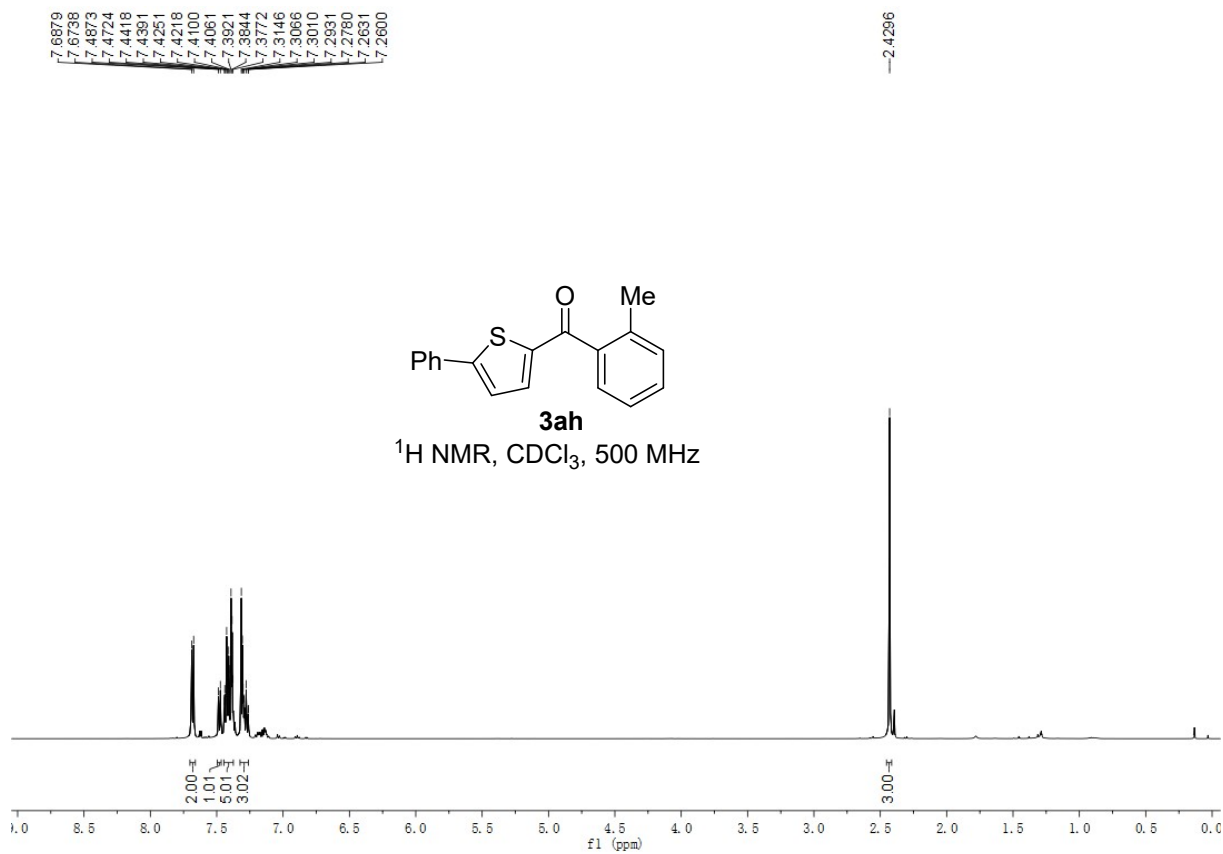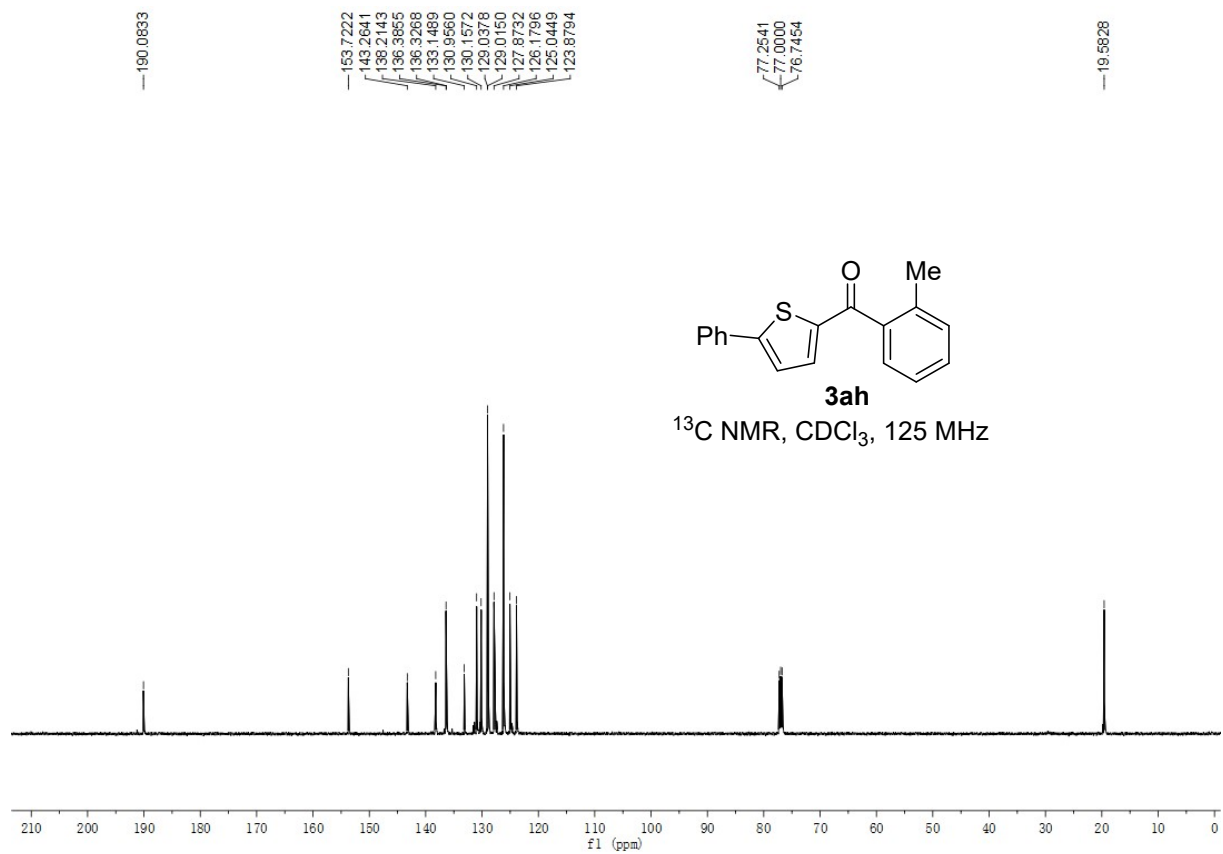

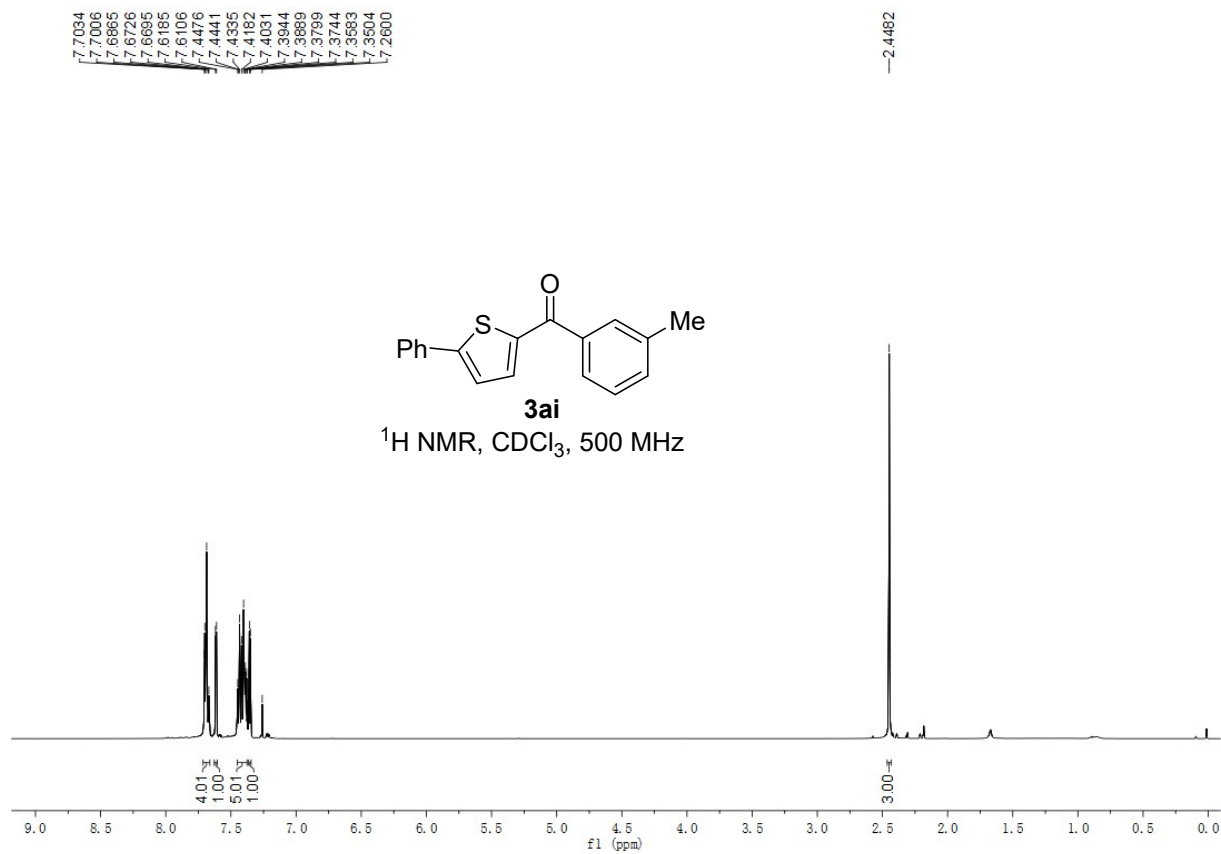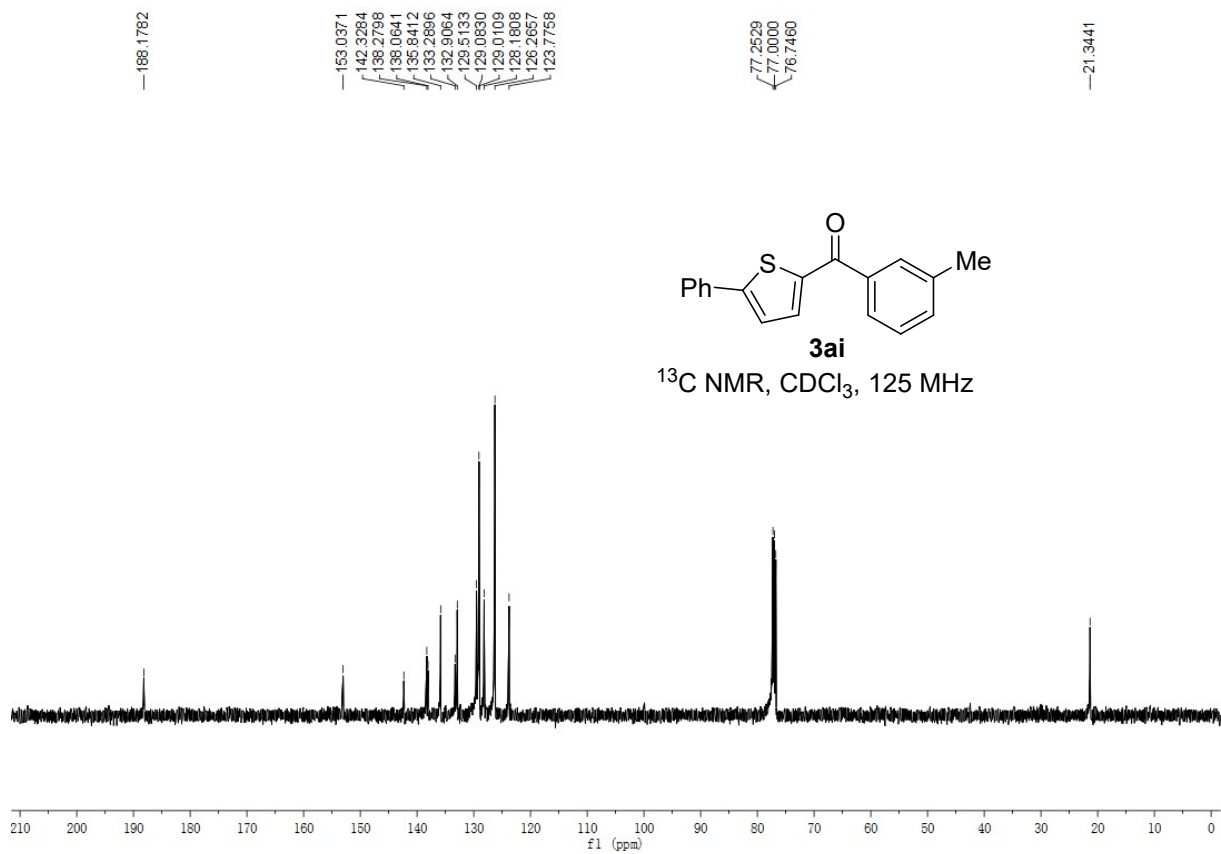

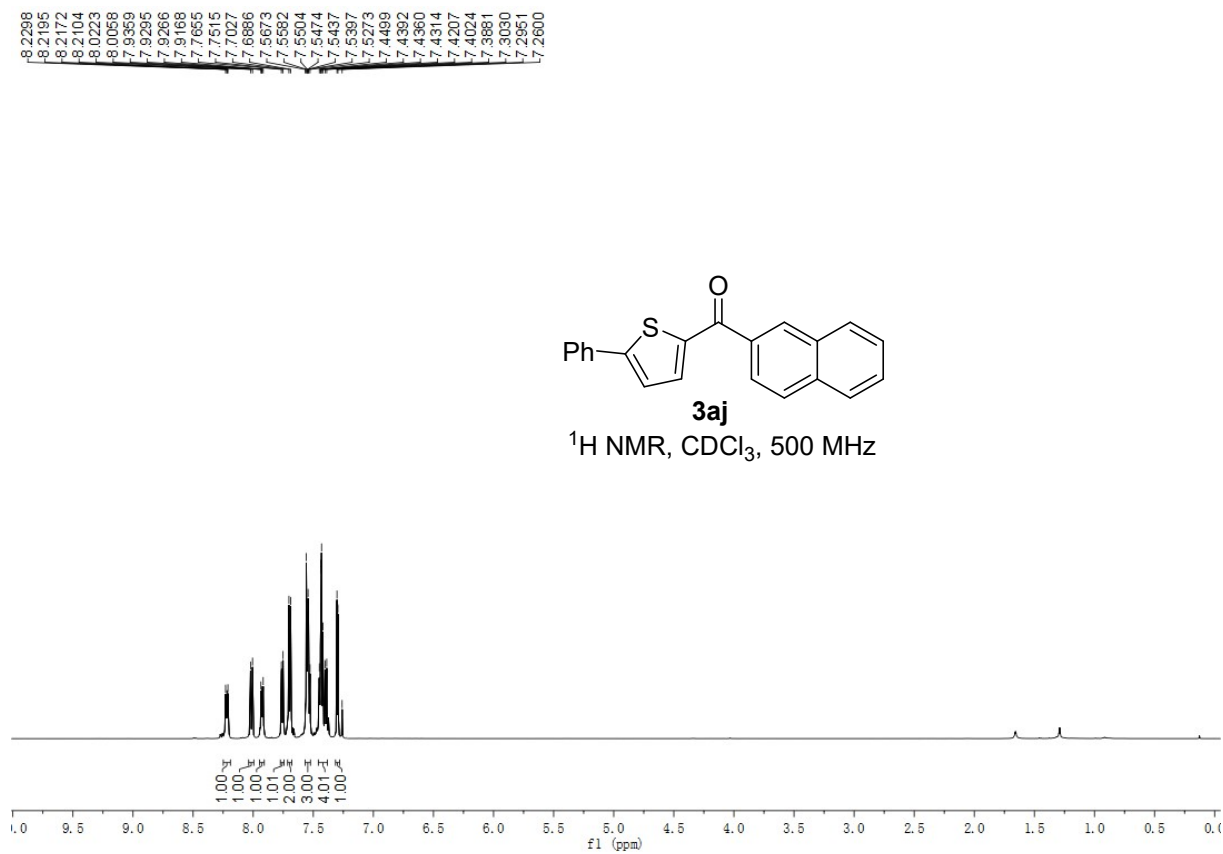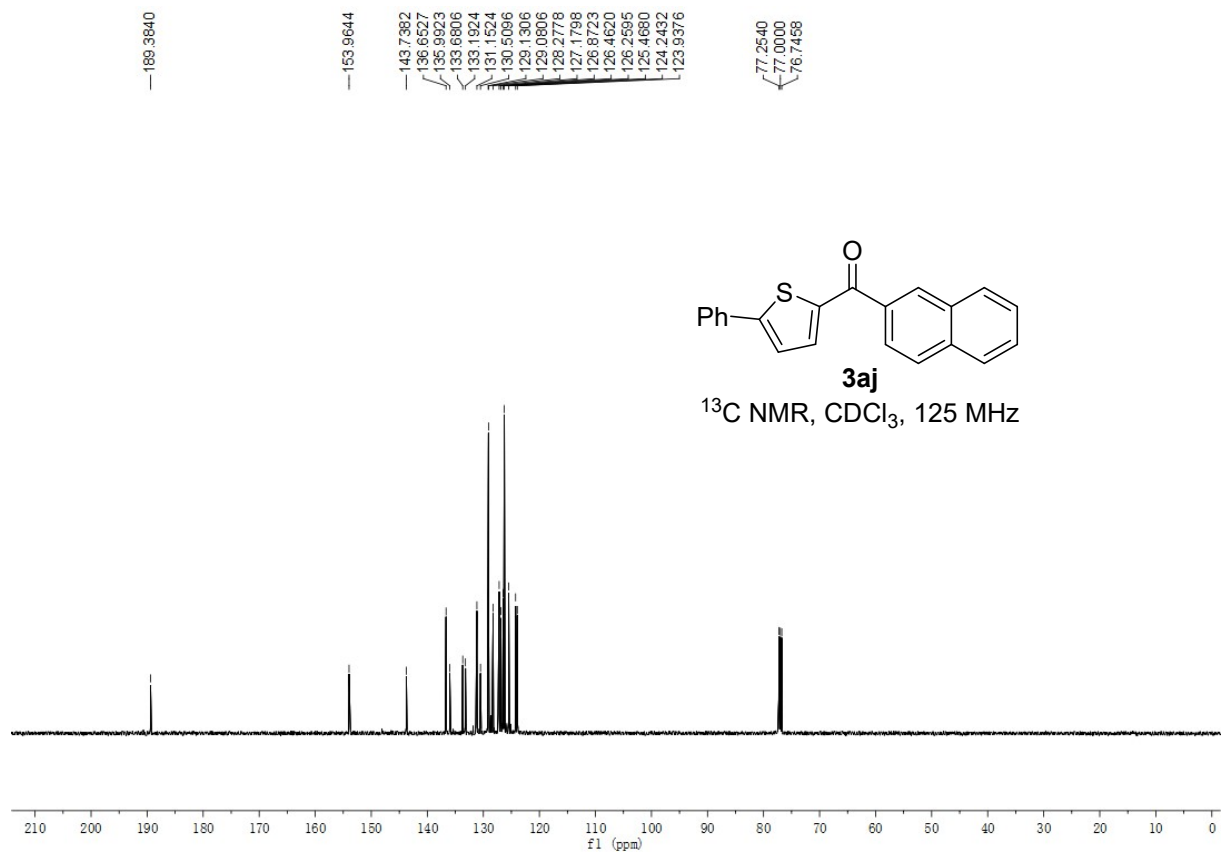

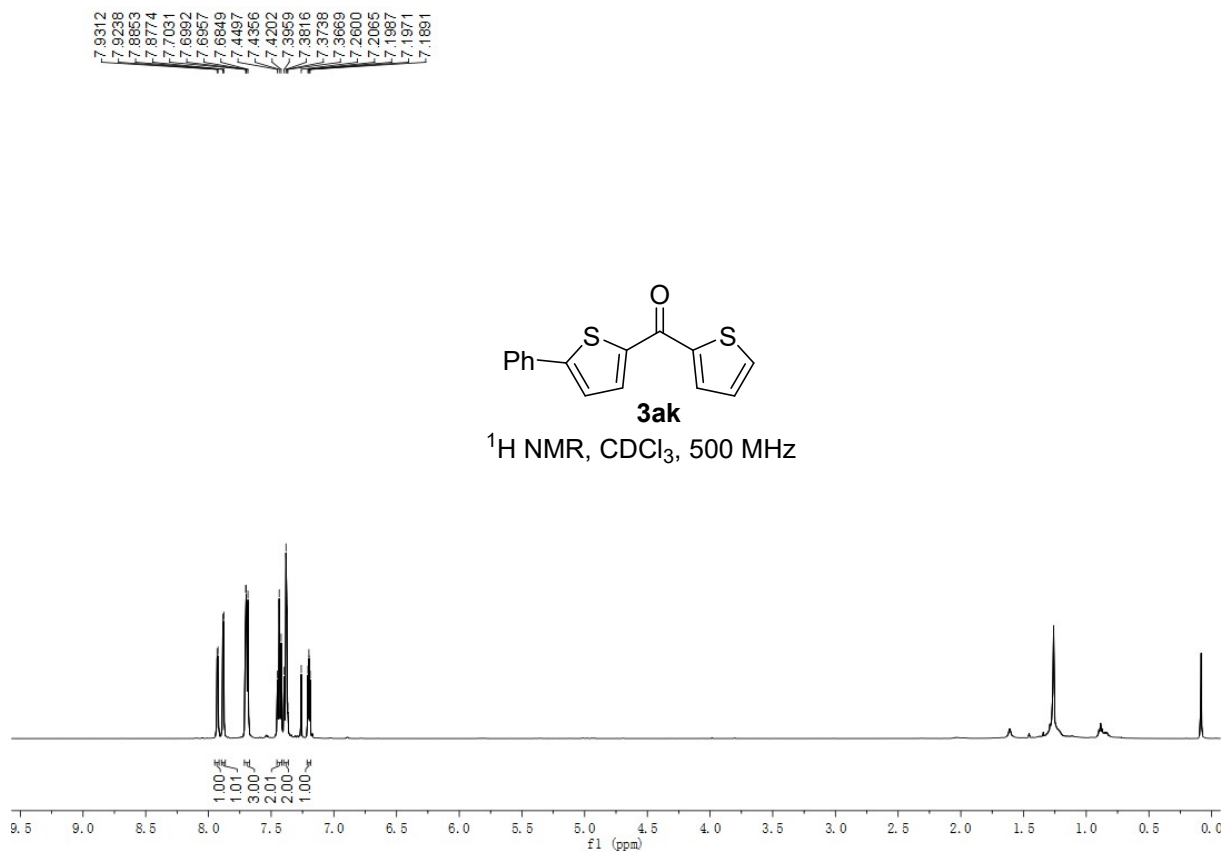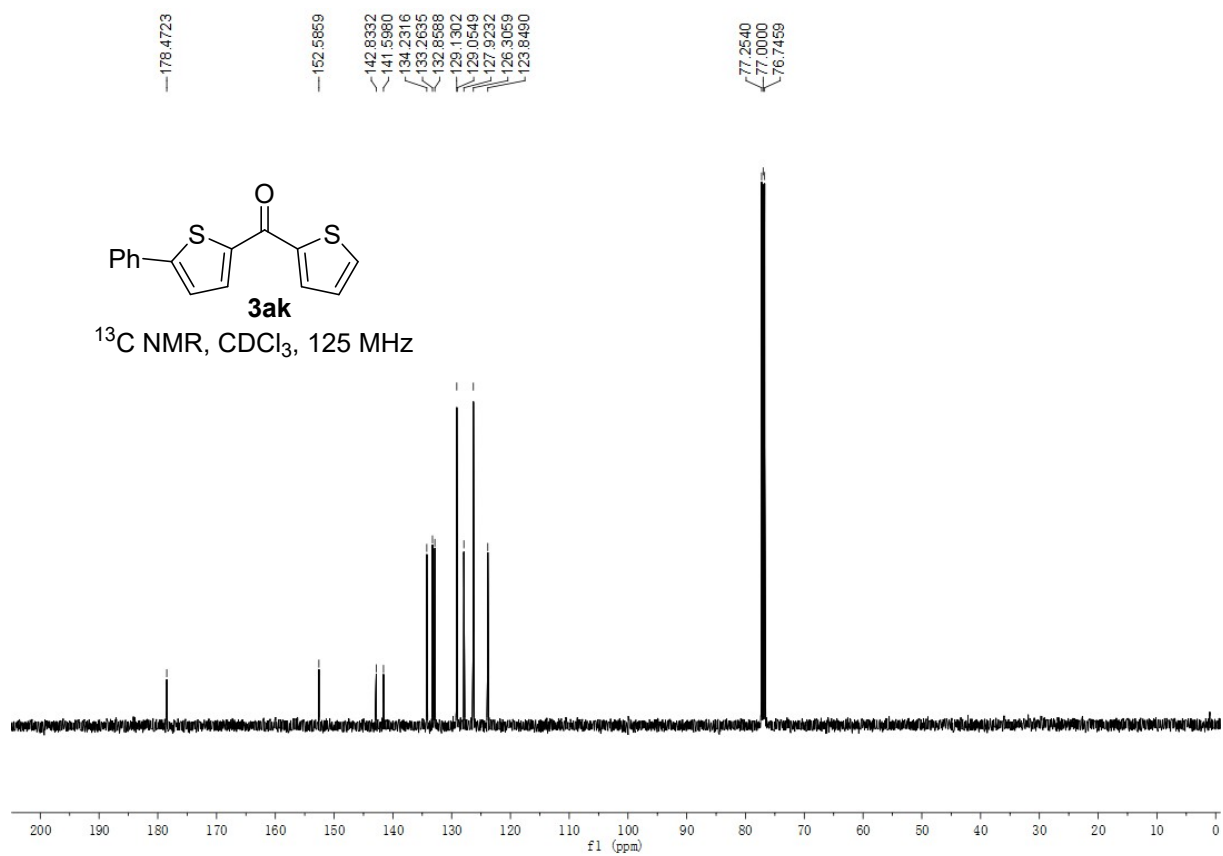

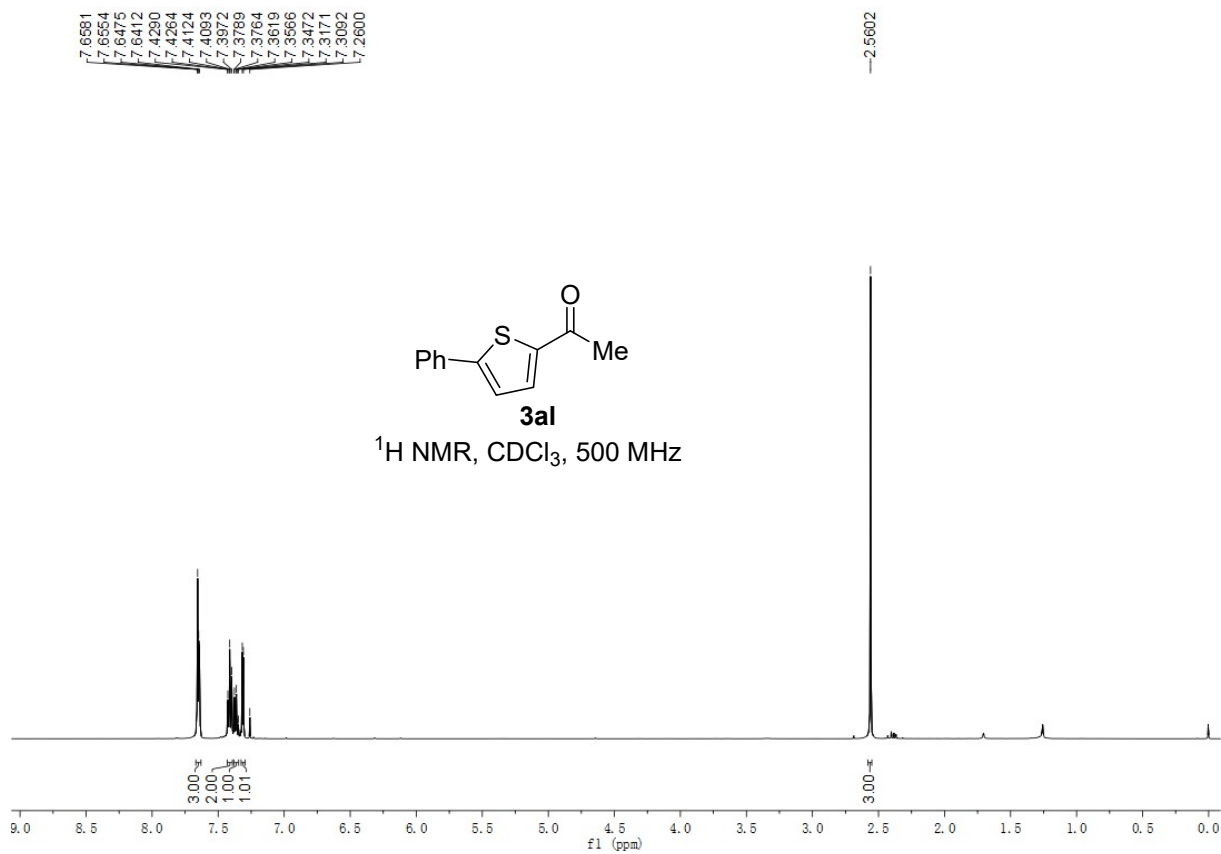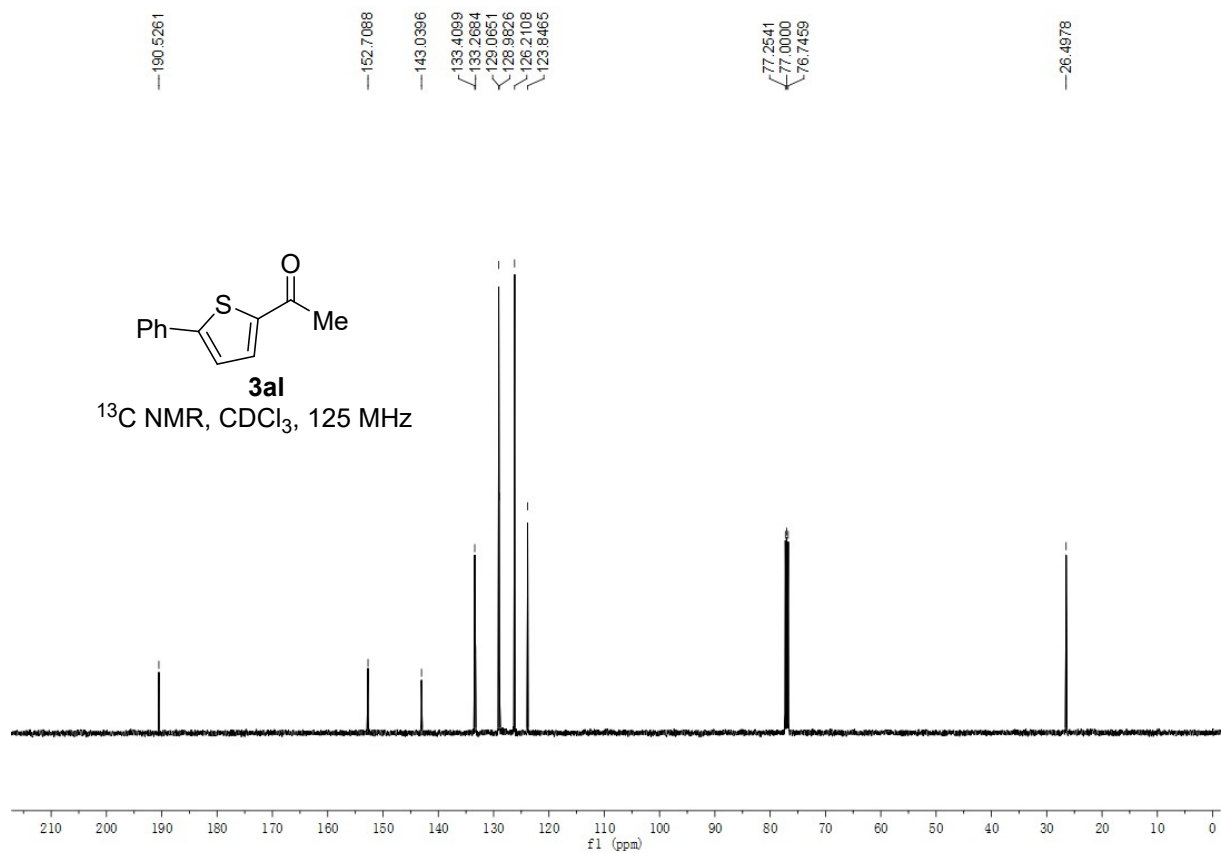



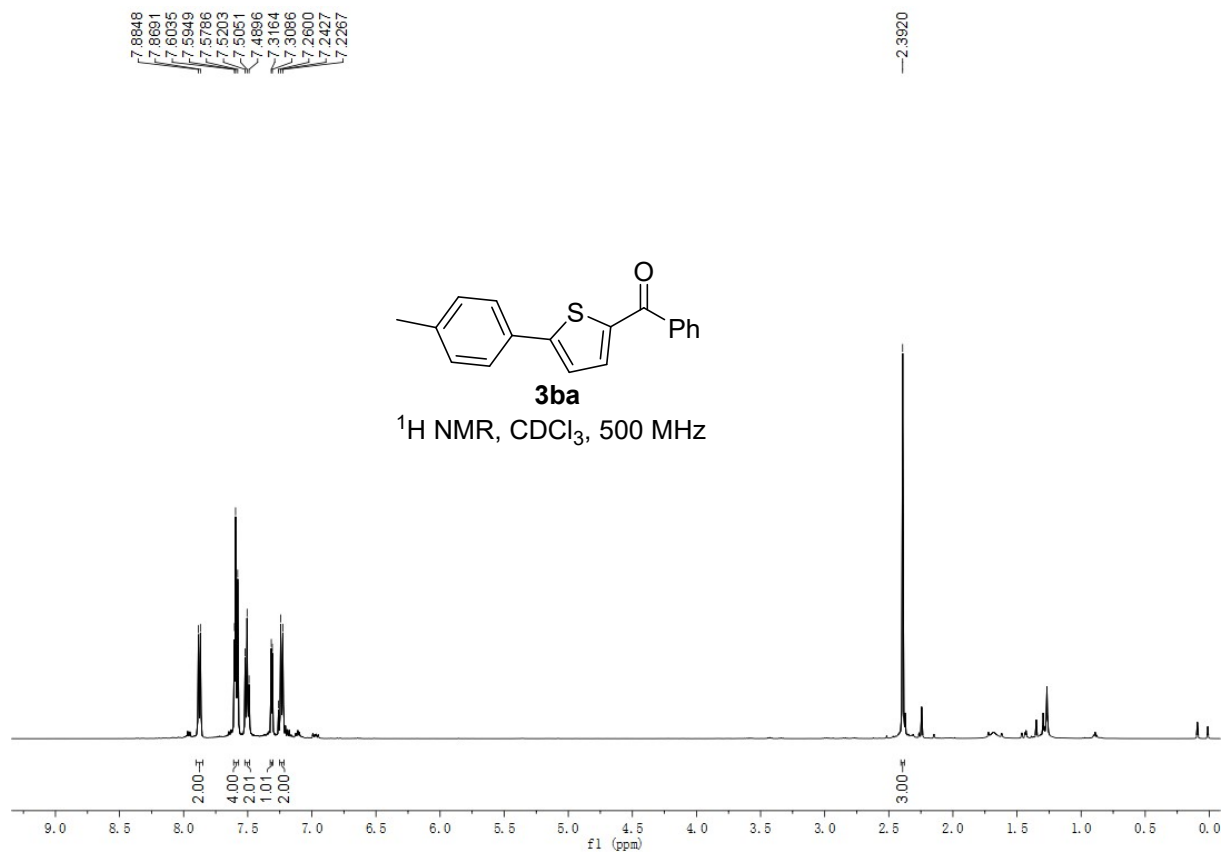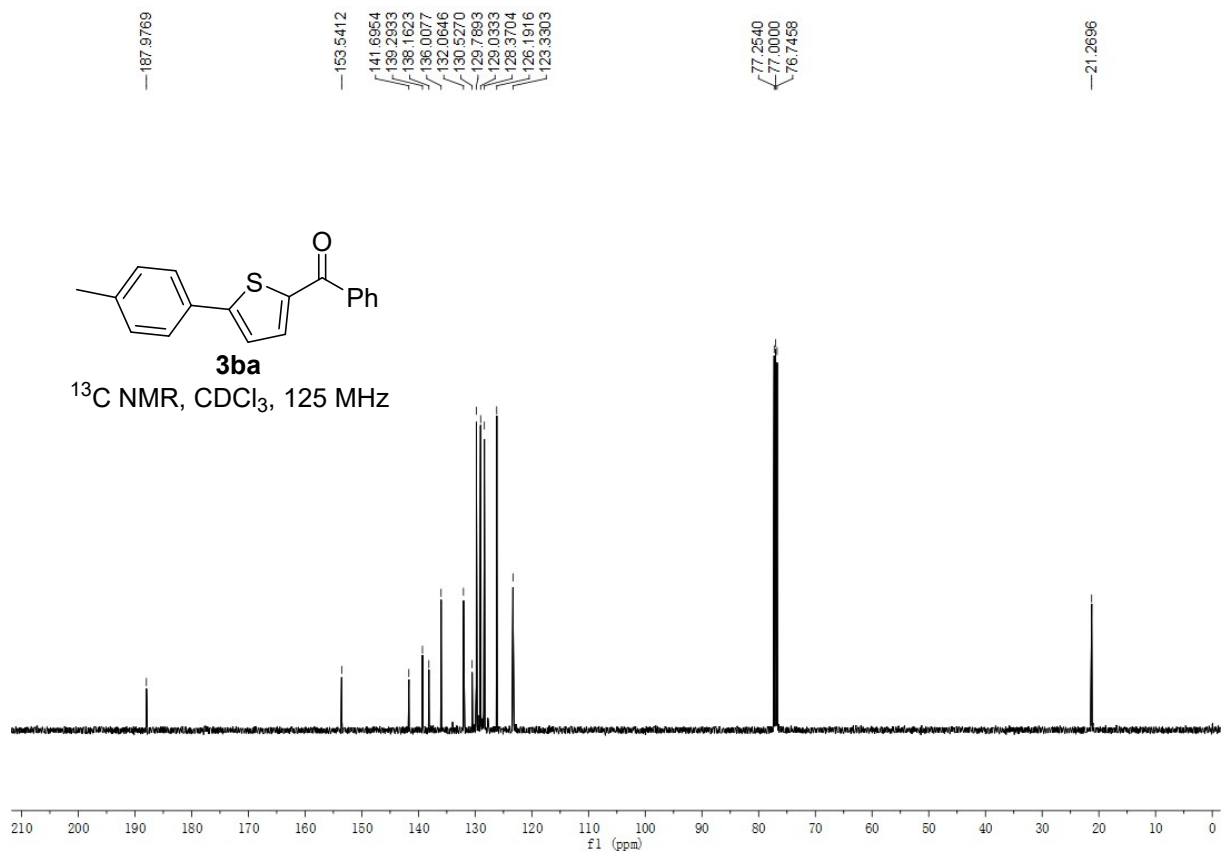

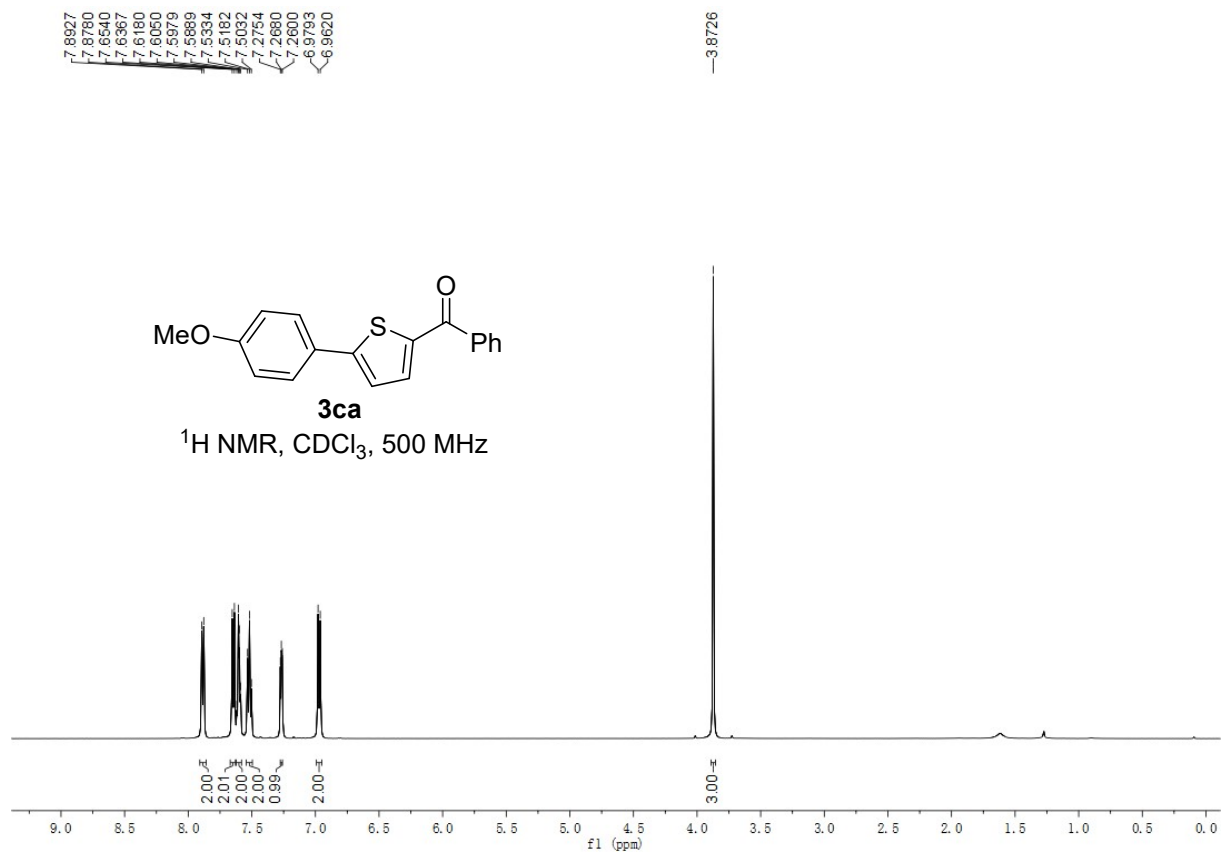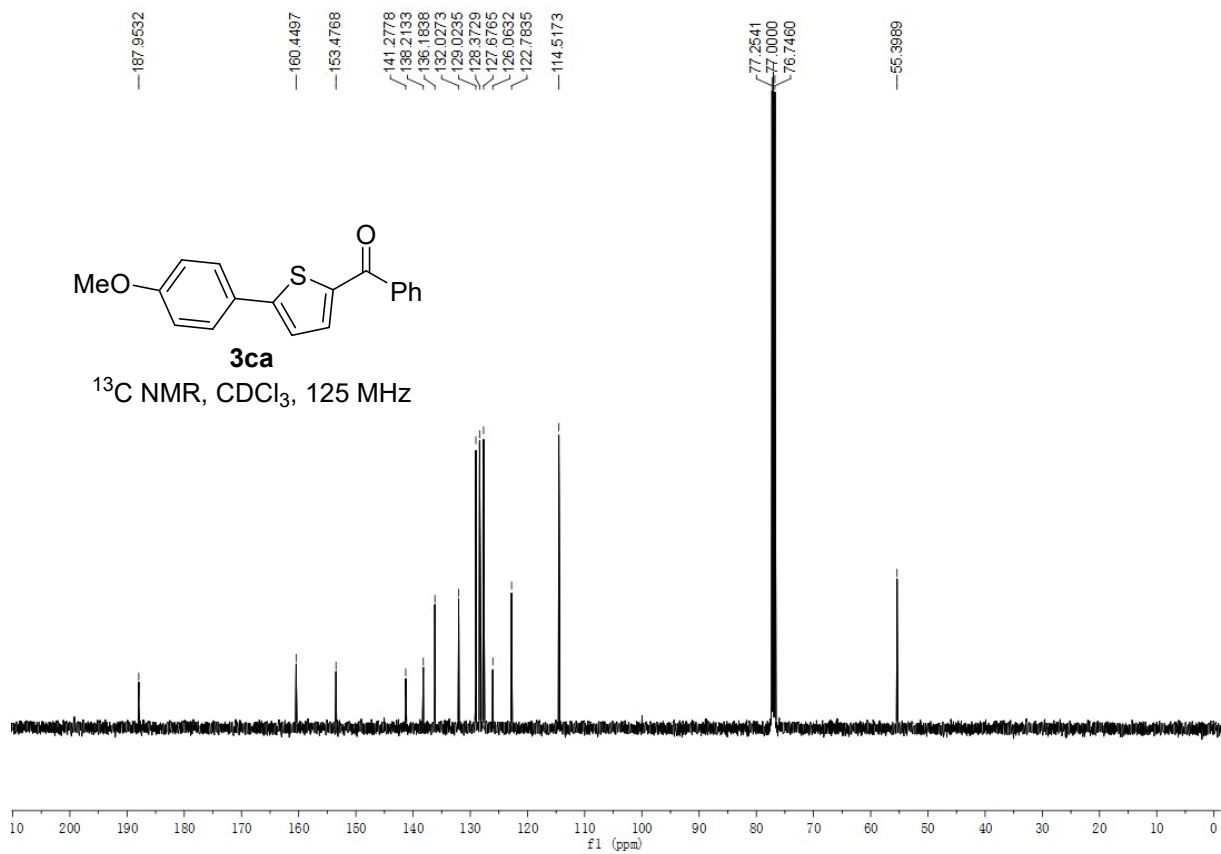

7.9023  
7.8862  
7.7838  
7.7671  
7.6800  
7.6634  
7.6430  
7.6348  
7.6292  
7.6077  
7.5928  
7.5862  
7.5207  
7.5059  
7.4888  
7.4740  
7.4583  
7.4071  
7.3962  
7.3867  
7.3721  
7.2600

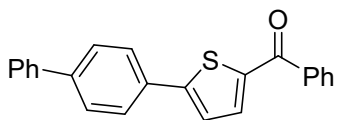

**3da**

<sup>1</sup>H NMR, CDCl<sub>3</sub>, 500 MHz

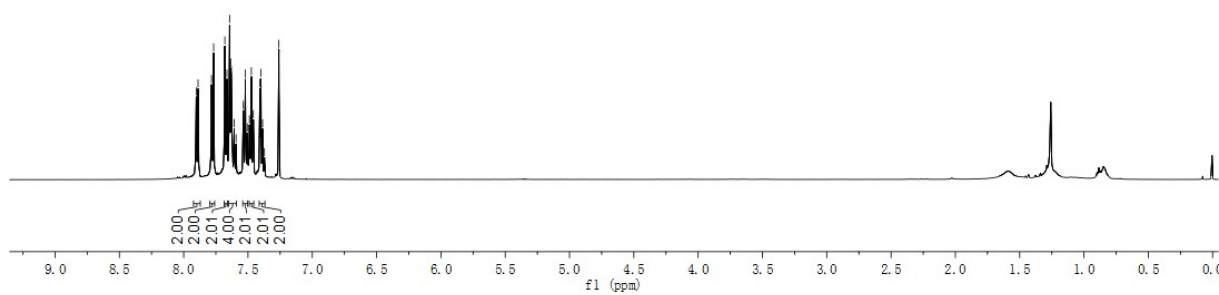

187.9879

152.8478  
142.2457  
141.8894  
140.0961  
138.1143  
136.0033  
132.2300  
132.1747  
129.0905  
128.9097  
128.4318  
127.7624  
126.9625  
126.7100  
123.8215

77.2542  
77.0000  
76.7460

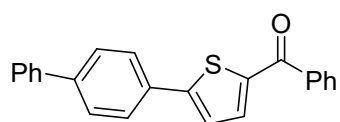

**3da**

<sup>13</sup>C NMR, CDCl<sub>3</sub>, 125 MHz

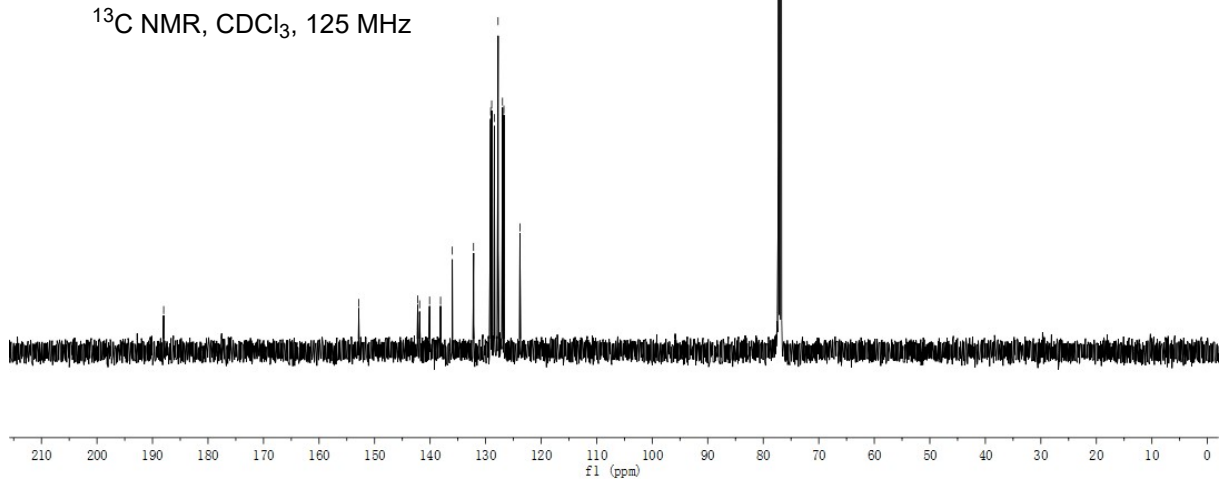

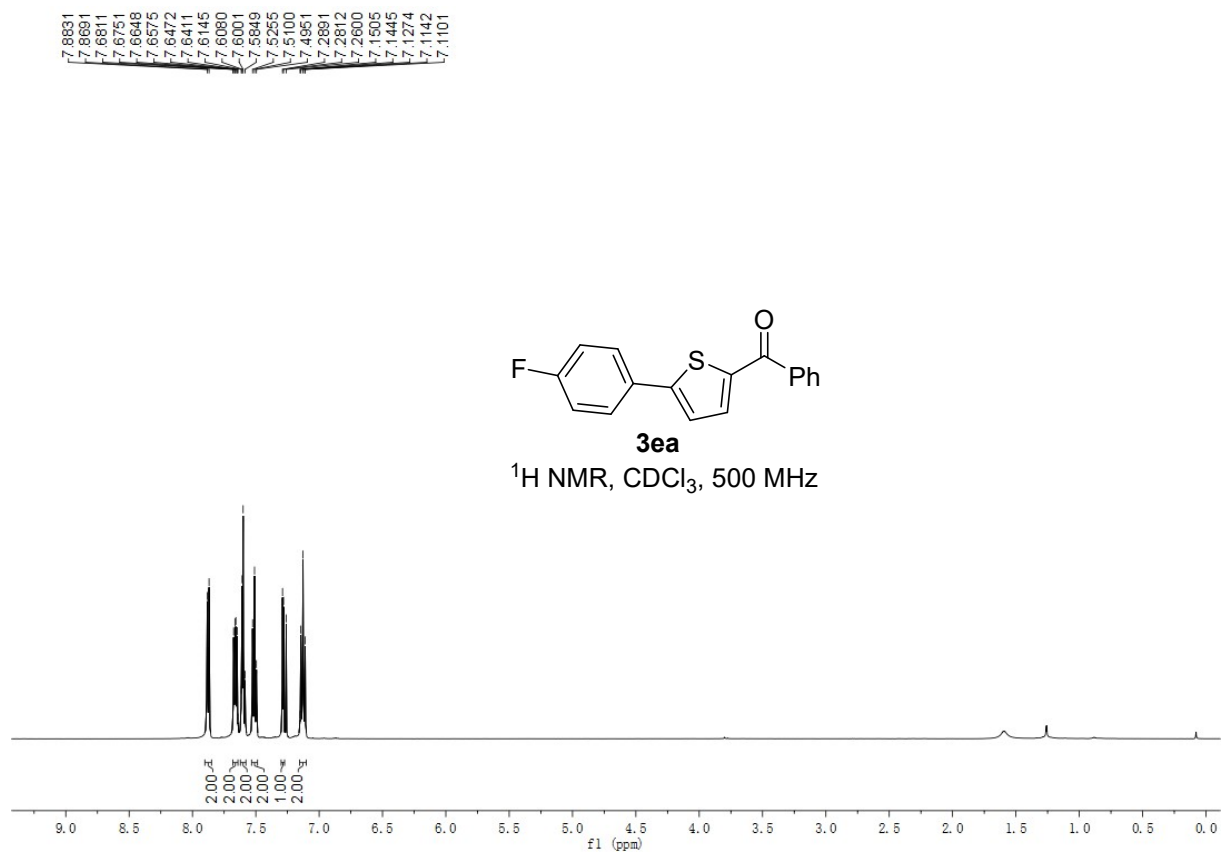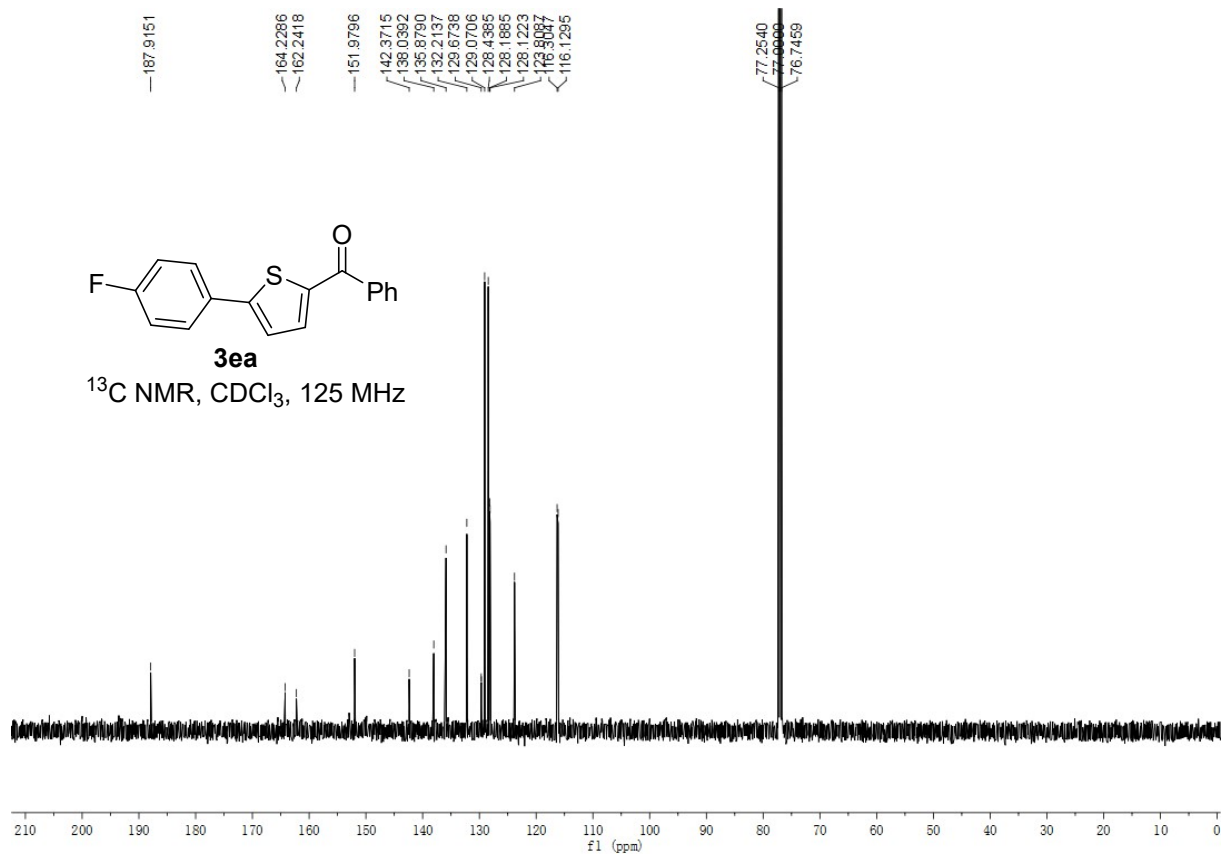

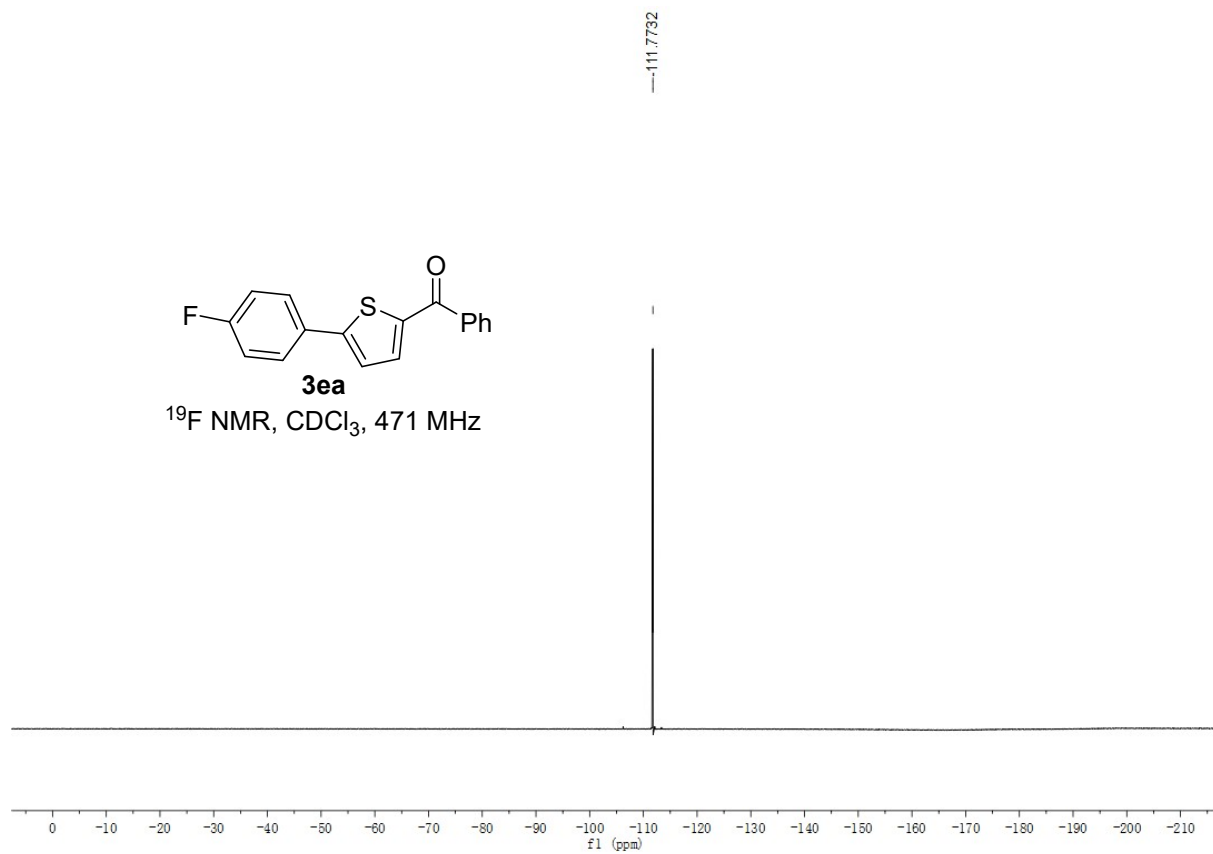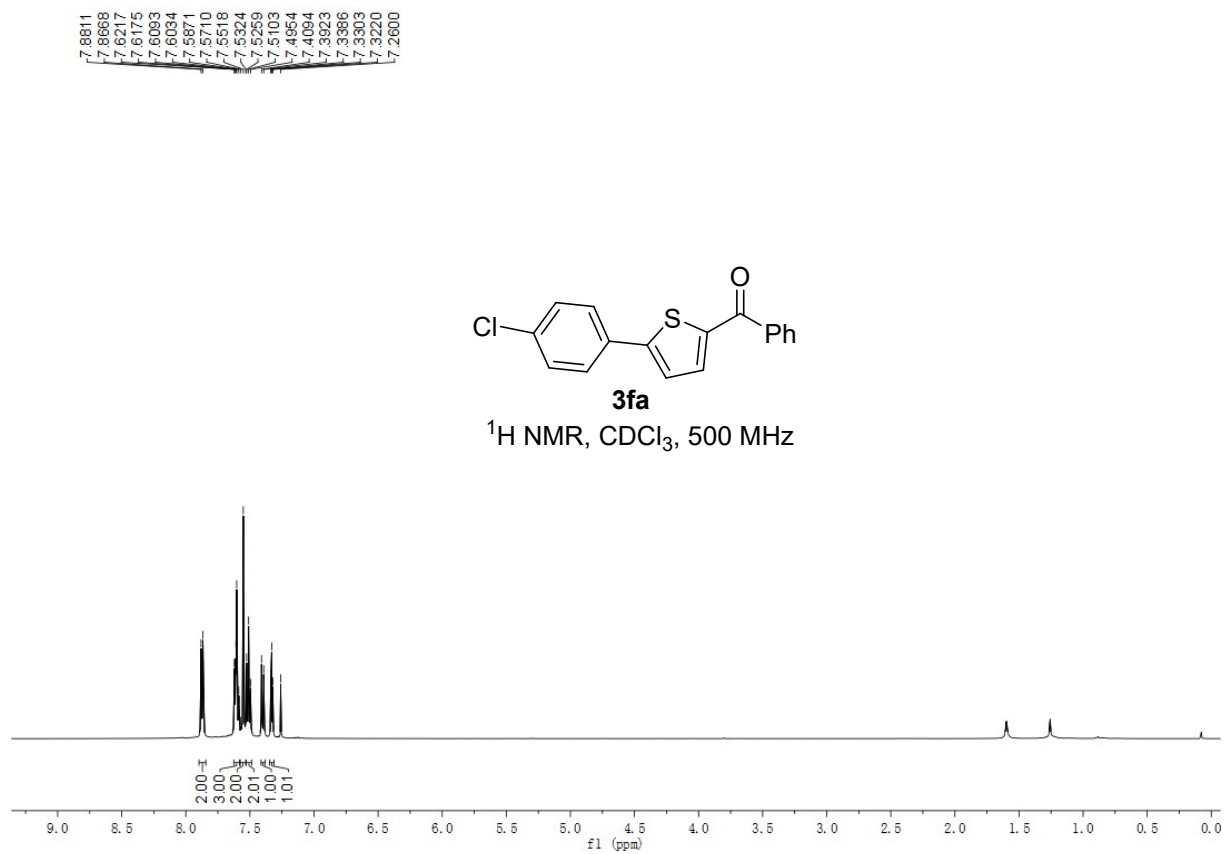

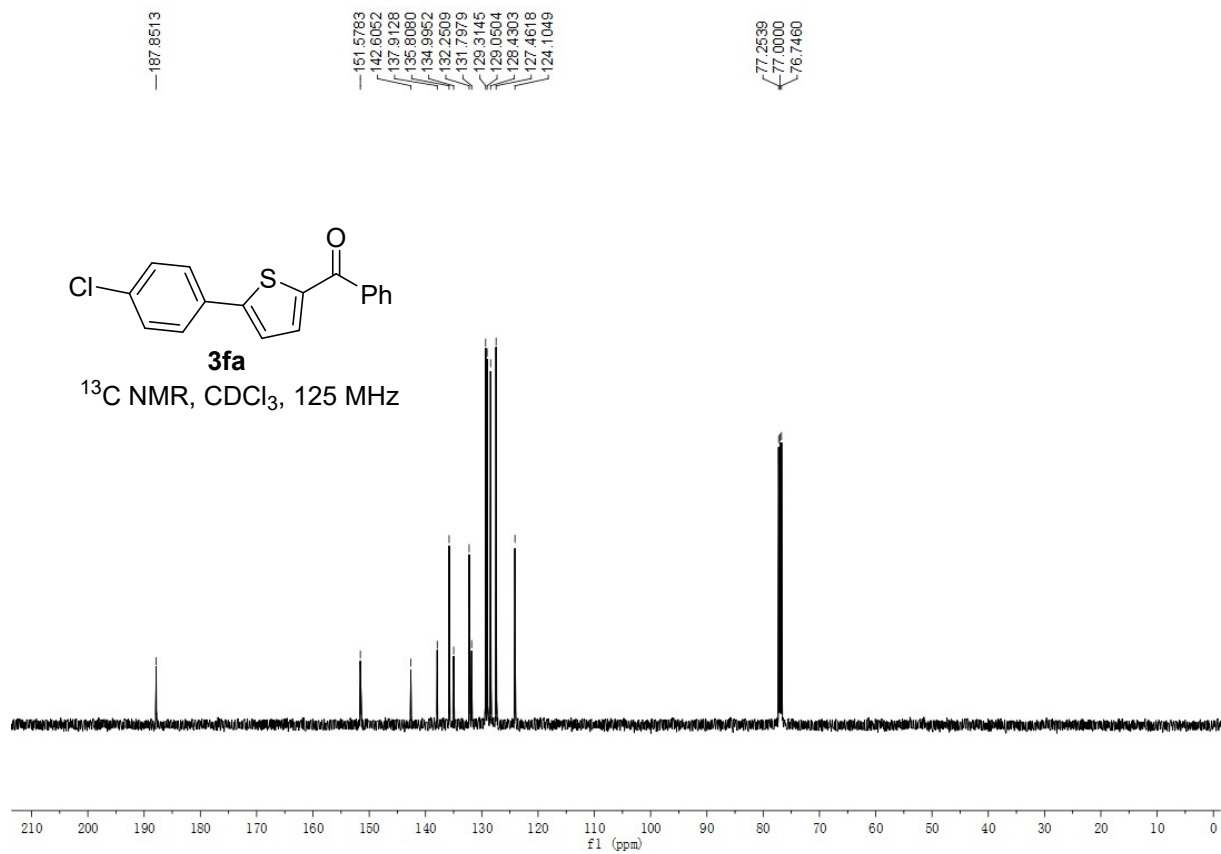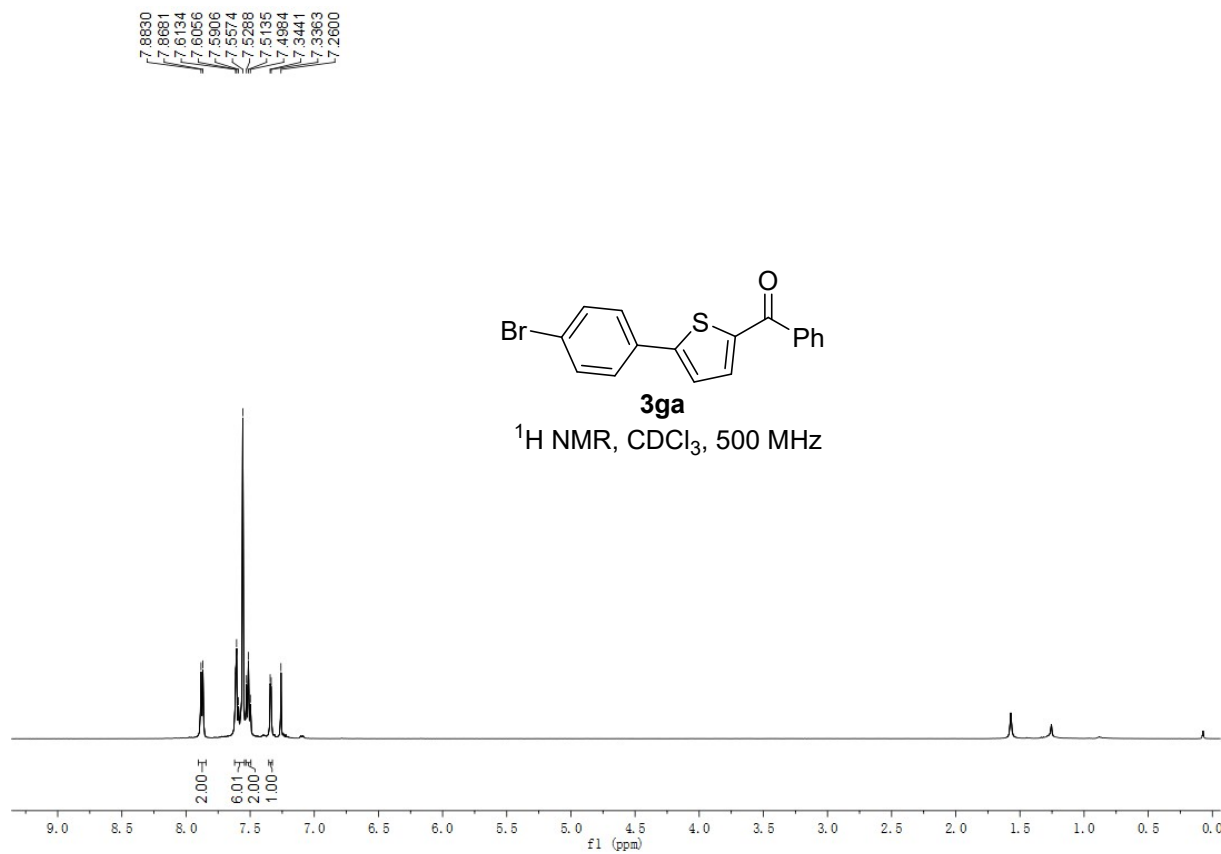

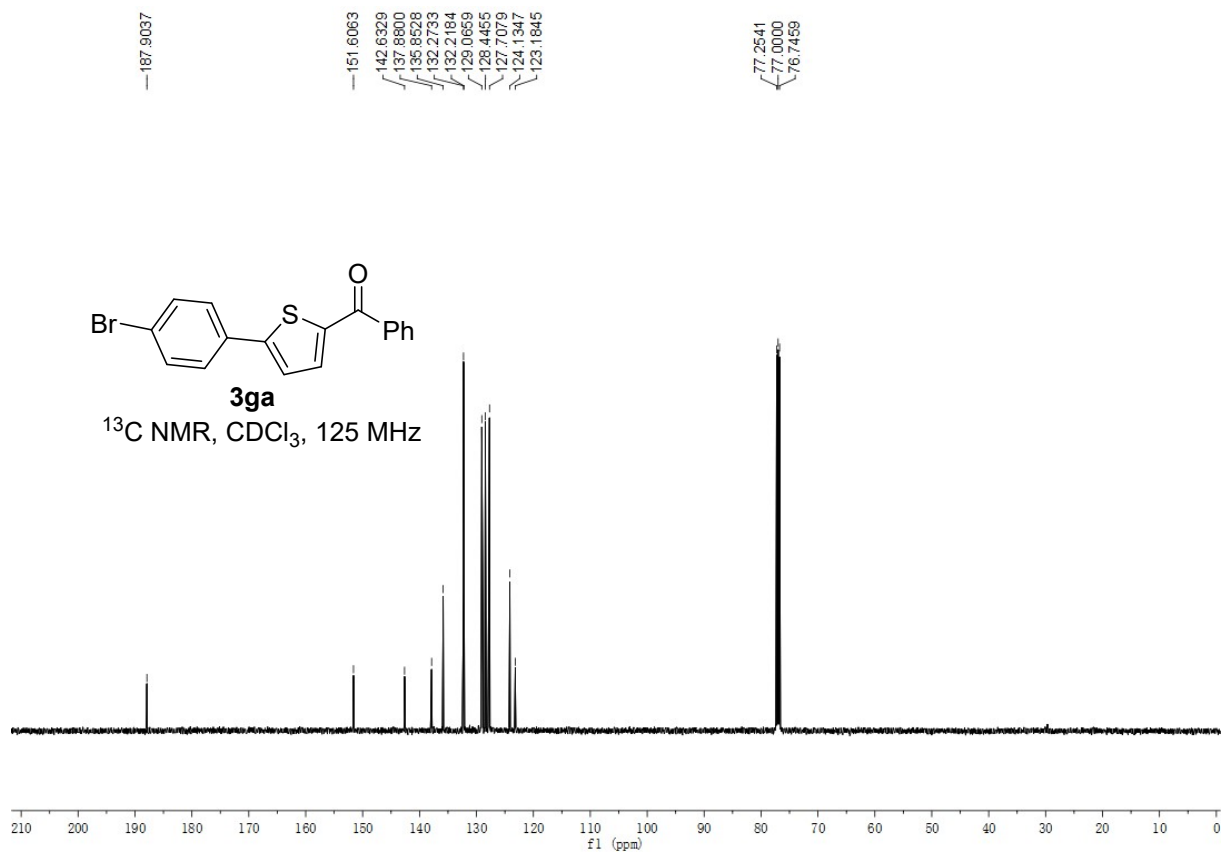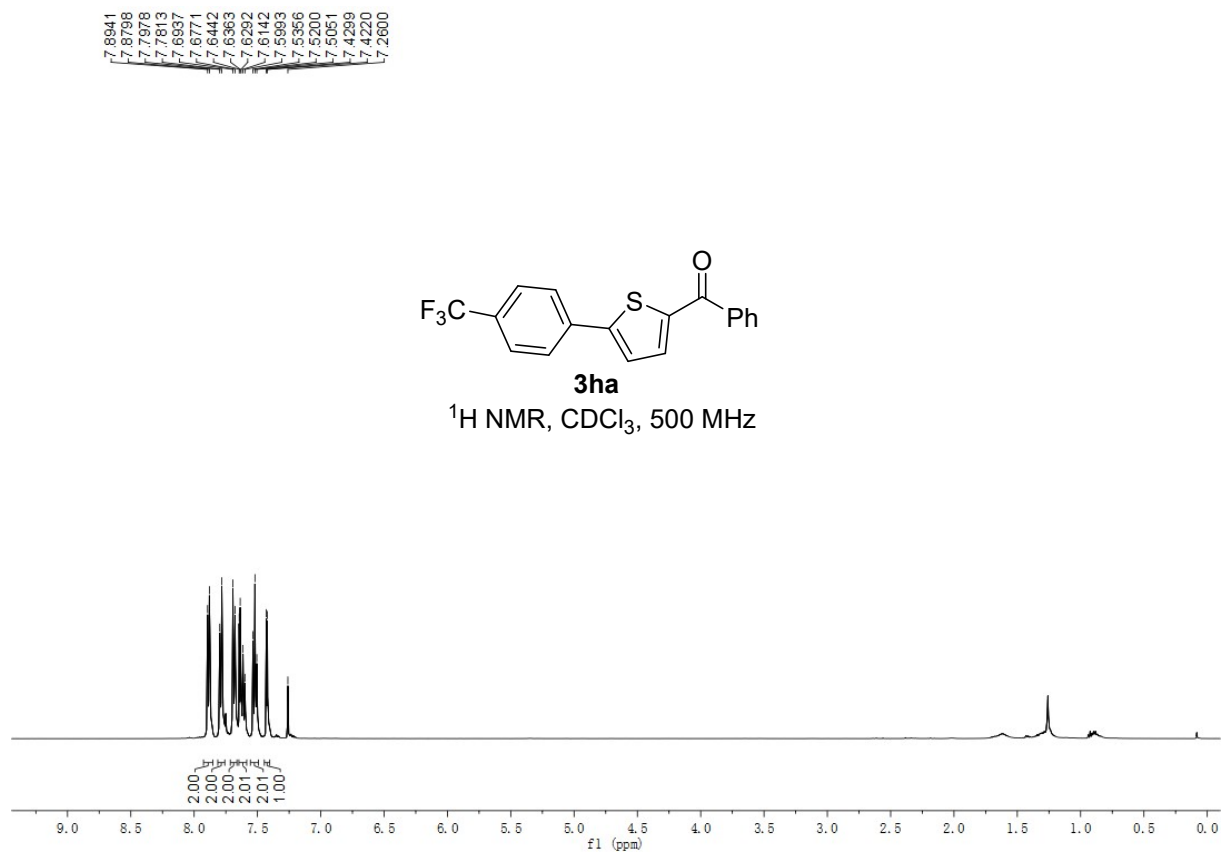

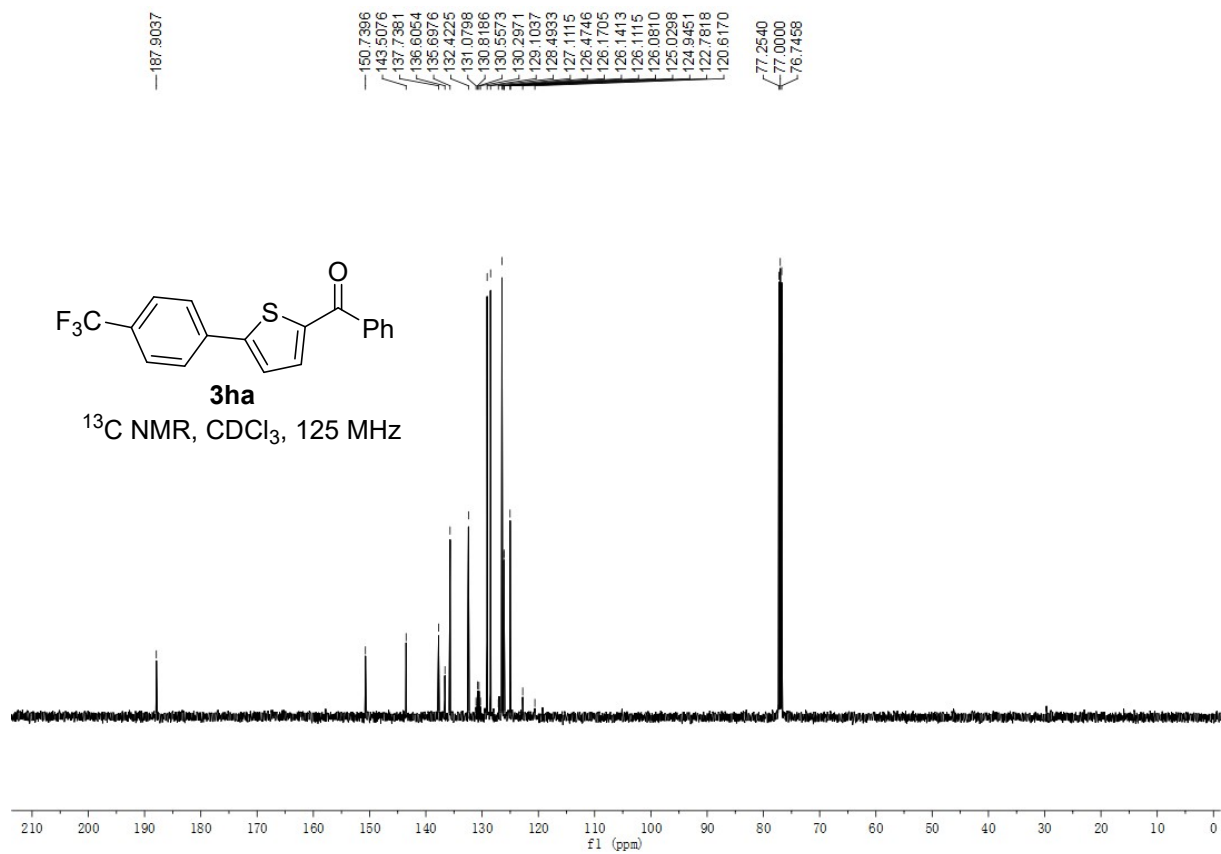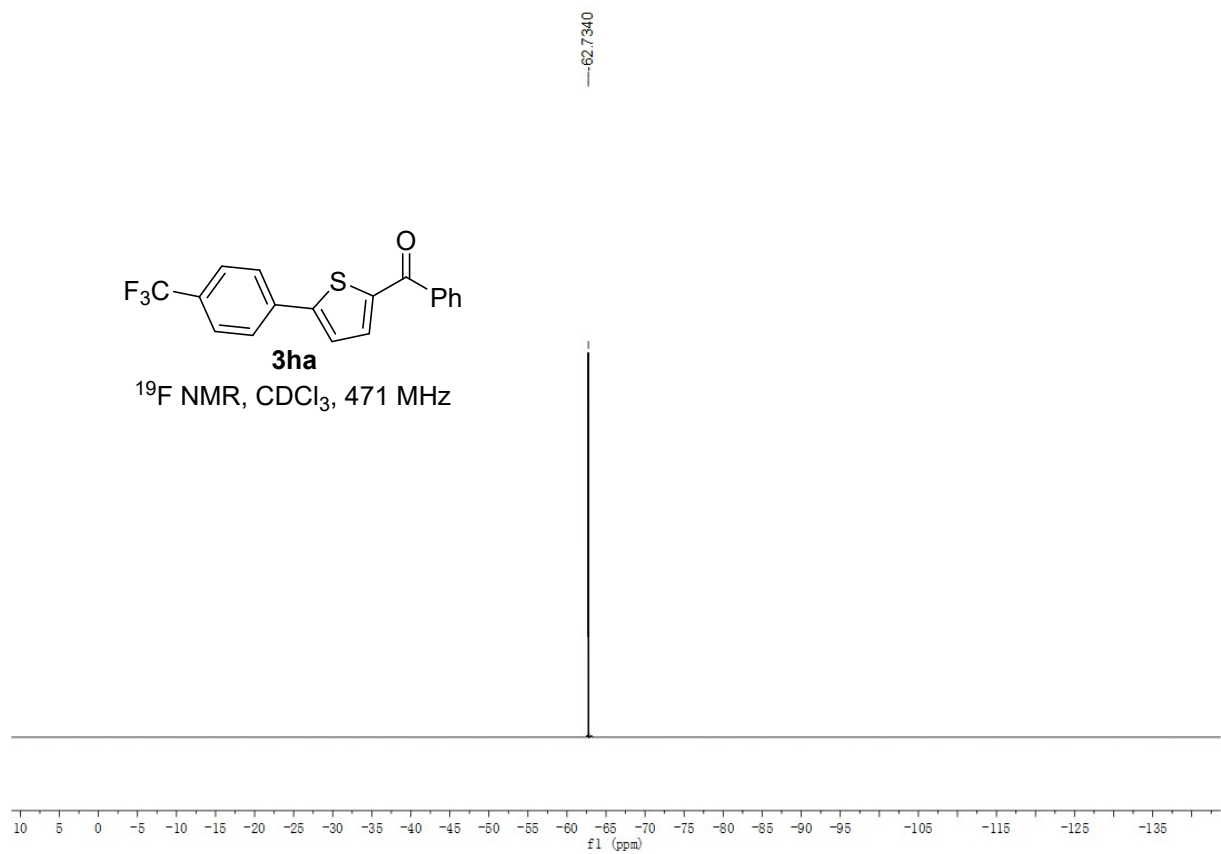

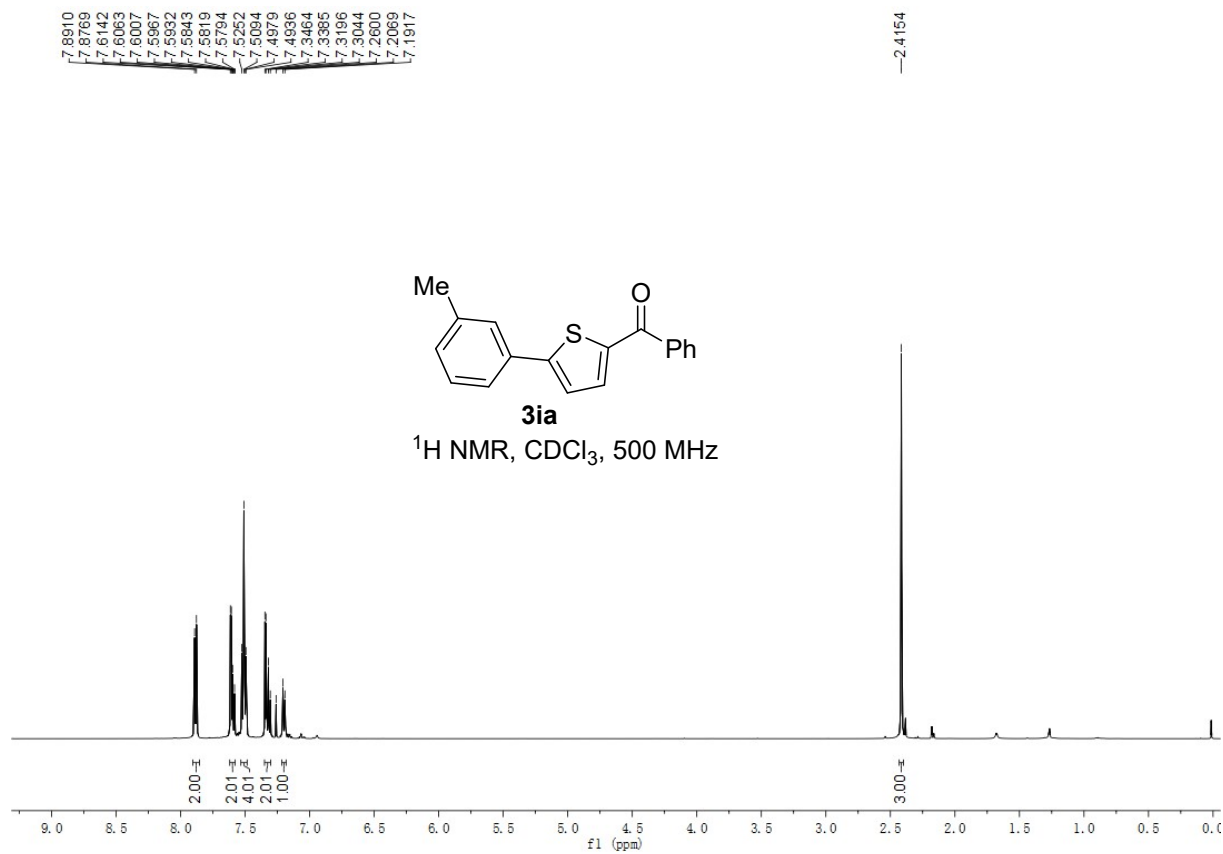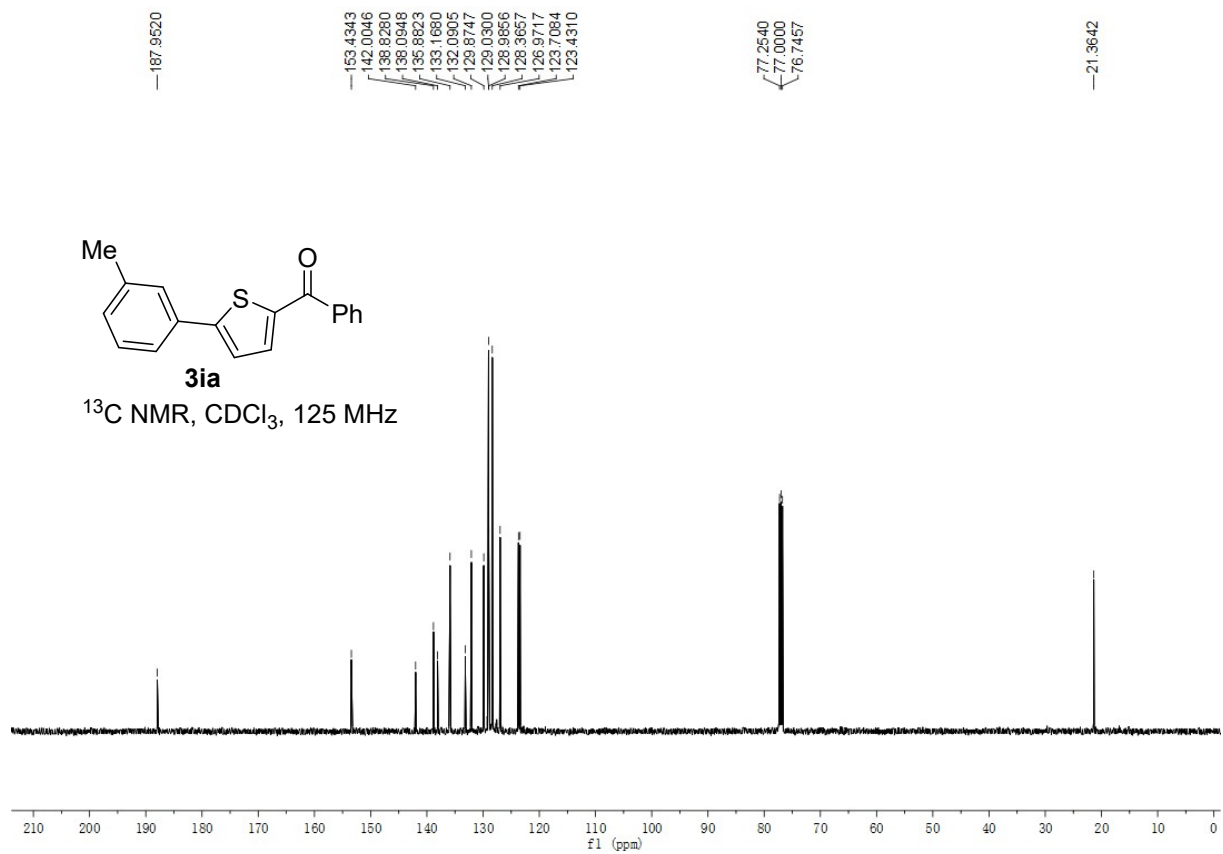

7.8645  
7.8503  
7.8069  
7.5911  
7.5762  
7.5698  
7.5618  
7.5178  
7.5023  
7.4910  
7.4880  
7.2798  
7.2718  
7.2600  
6.7286  
6.7218  
6.5108  
6.5072  
6.5040  
6.5005

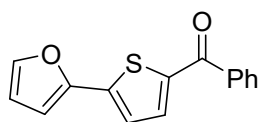

**3ja**

$^1\text{H}$  NMR,  $\text{CDCl}_3$ , 500 MHz

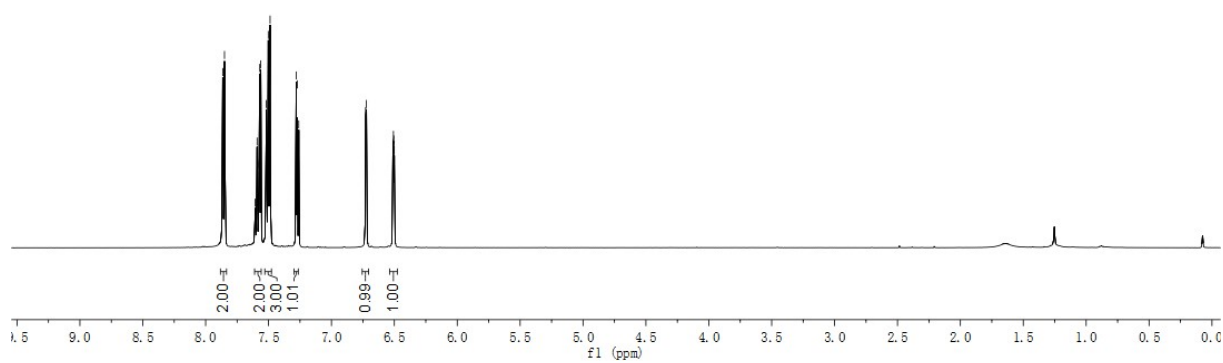

187.8648

148.5061  
143.2028  
141.9127  
141.4385  
138.1027  
135.6654  
132.1456  
129.0049  
128.4171  
122.8095

112.2213  
108.1467

77.2541  
77.0000  
76.7460

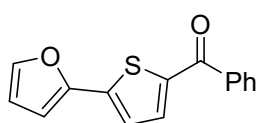

**3ja**

$^{13}\text{C}$  NMR,  $\text{CDCl}_3$ , 125 MHz

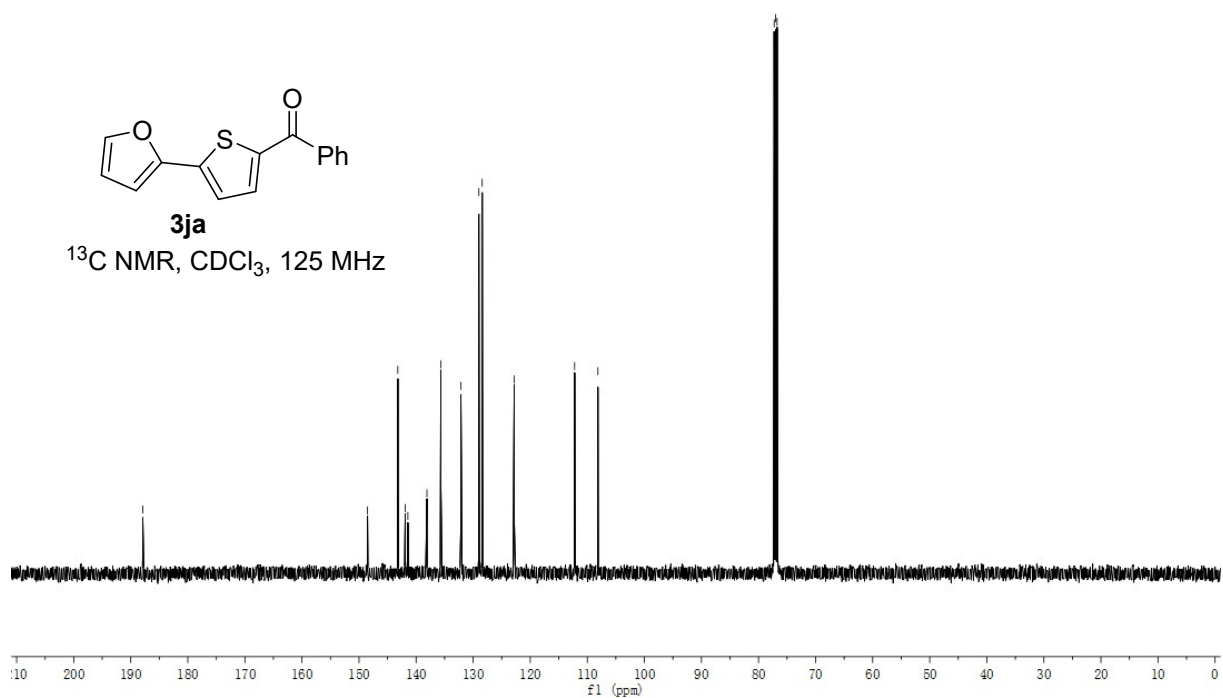

7.8653  
7.8510  
7.6049  
7.5901  
7.5762  
7.5423  
7.5344  
7.5168  
7.5013  
7.4864  
7.3656  
7.3465  
7.3304  
7.2600  
7.2031  
7.1952  
7.0778  
7.0703  
7.0677  
7.0603

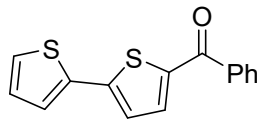

**3ka**

<sup>1</sup>H NMR, CDCl<sub>3</sub>, 500 MHz

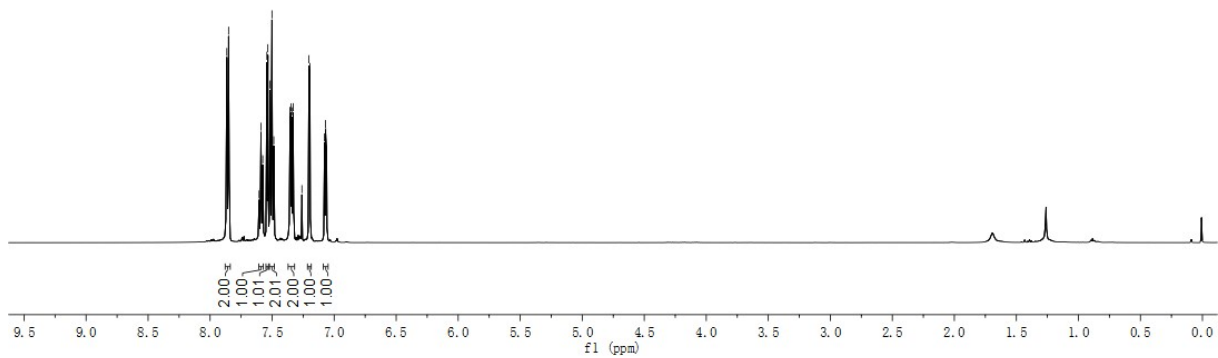

—187.7534

146.1818  
141.5411  
137.9654  
136.2522  
135.7882  
132.1543  
128.9811  
128.4051  
128.2502  
126.5698  
125.7352  
124.0613

77.2540  
77.0000  
76.7458

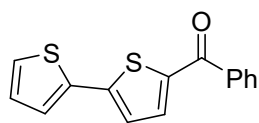

**3ka**

<sup>13</sup>C NMR, CDCl<sub>3</sub>, 125 MHz

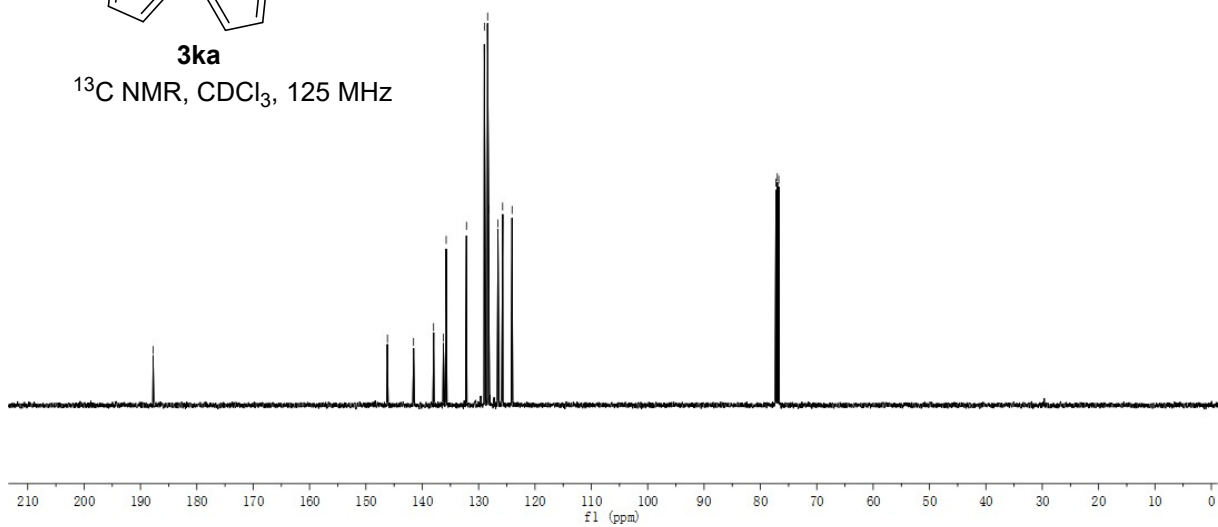

8.2834  
8.0543  
8.0388  
7.9212  
7.9065  
7.8537  
7.6449  
7.6300  
7.5601  
7.5446  
7.5294  
7.5167  
7.5059  
7.4815  
7.4801  
7.2600

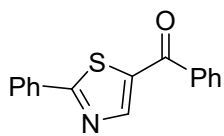

**10aa**

<sup>1</sup>H NMR, CDCl<sub>3</sub>, 500 MHz

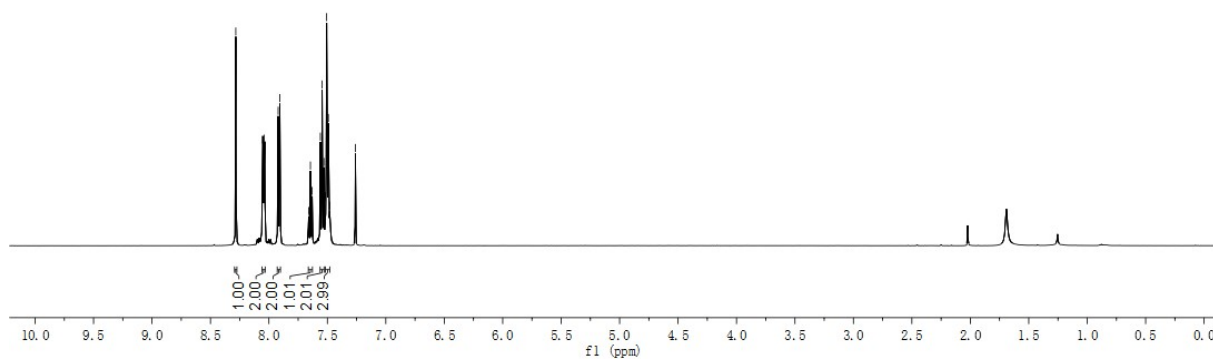

187.2934  
174.4626  
149.7246  
138.8077  
137.7155  
132.9007  
132.8507  
131.4651  
129.1834  
129.0572  
128.7097  
127.0984  
77.2539  
77.0000  
76.7459

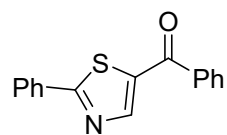

**10aa**

<sup>13</sup>C NMR, CDCl<sub>3</sub>, 125 MHz

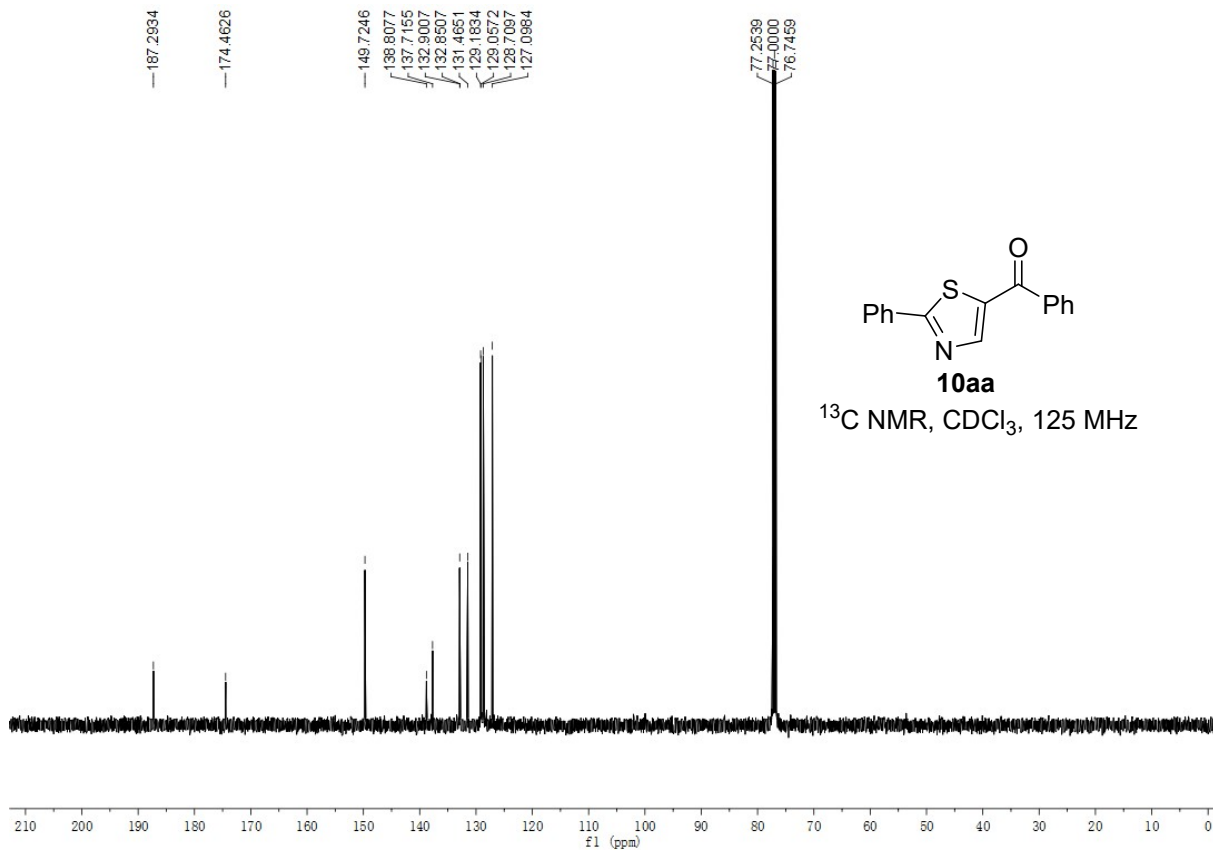

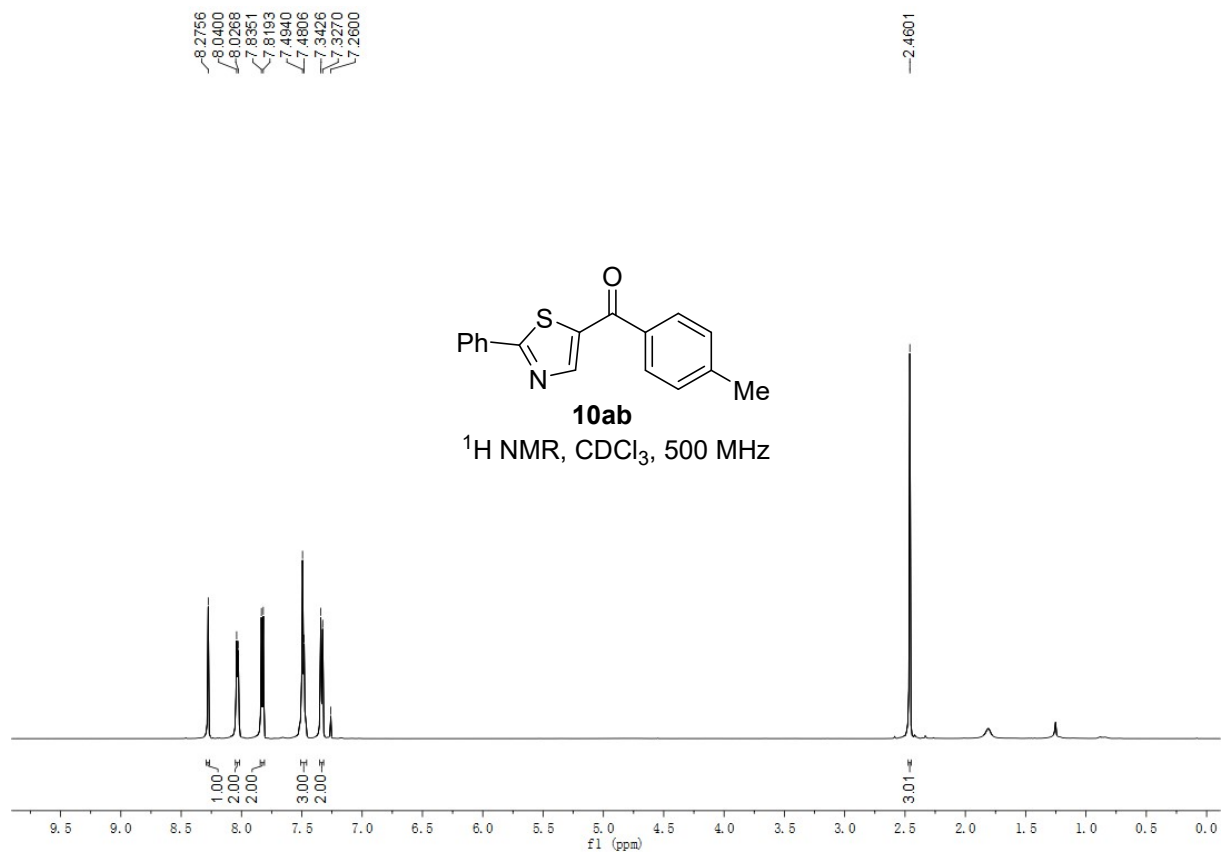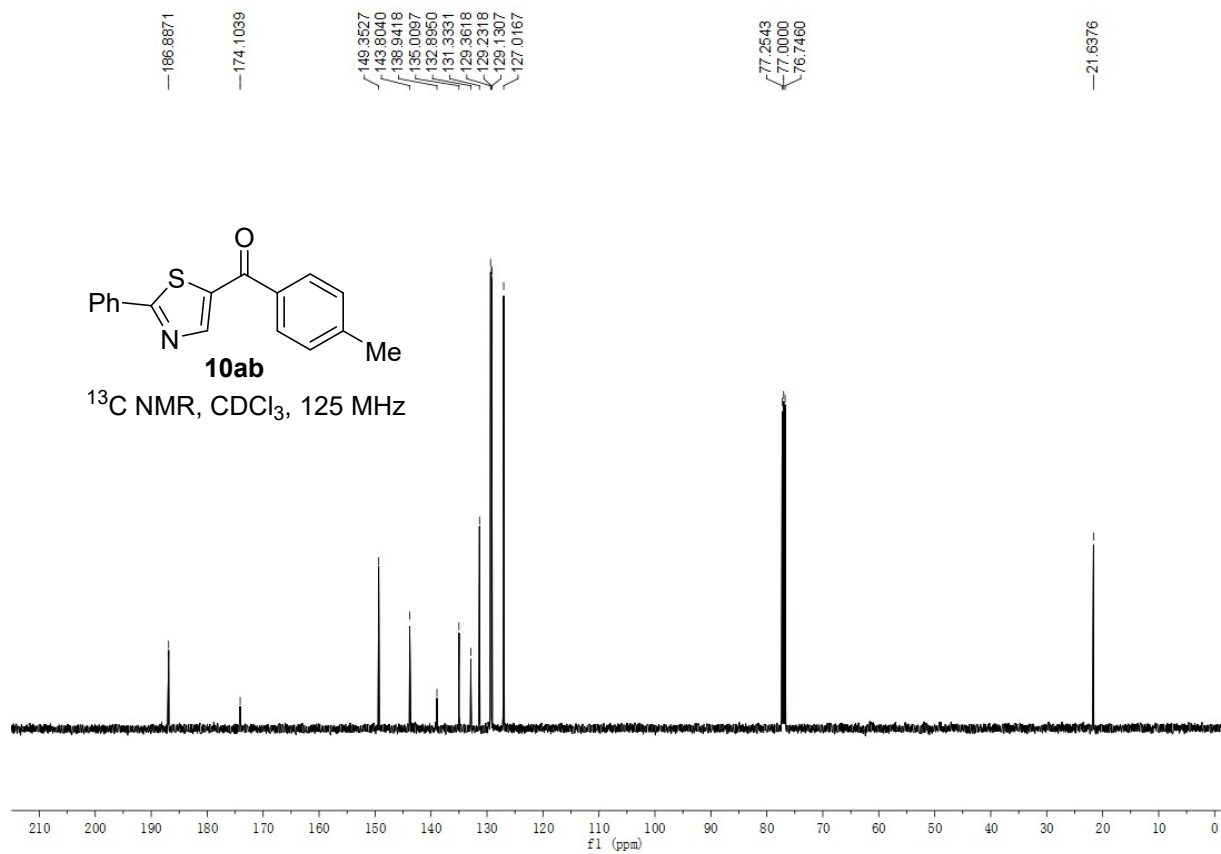

8.2560  
8.0474  
8.0320  
7.8711  
7.8540  
7.6367  
7.5311  
7.5273  
7.5230  
7.5210  
7.5139  
7.5084  
7.4865  
7.4825  
7.2600

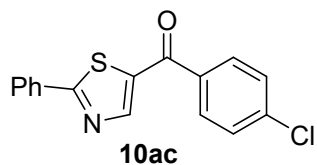

<sup>1</sup>H NMR, CDCl<sub>3</sub>, 500 MHz

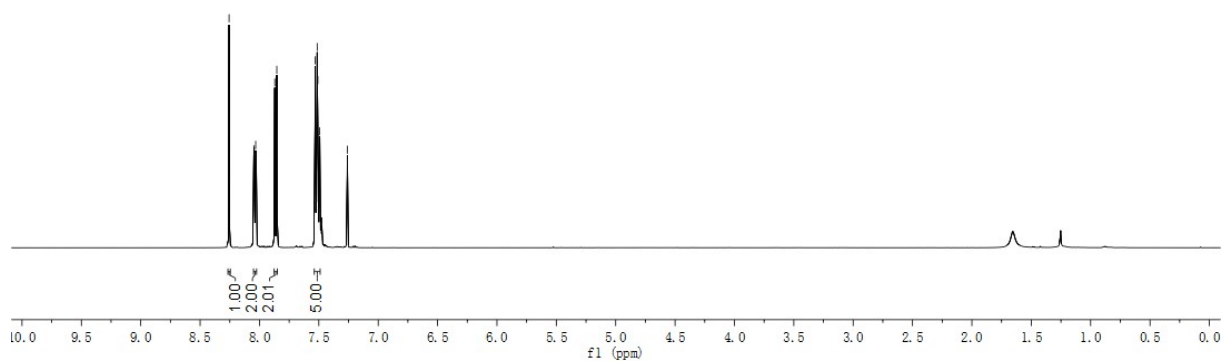

185.9706

174.7545

149.6780

139.4219

138.4284

135.9842

132.7699

131.5768

130.4378

129.2129

129.0768

127.1165

77.2541

77.0000

76.7461

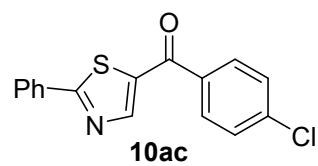

<sup>13</sup>C NMR, CDCl<sub>3</sub>, 125 MHz

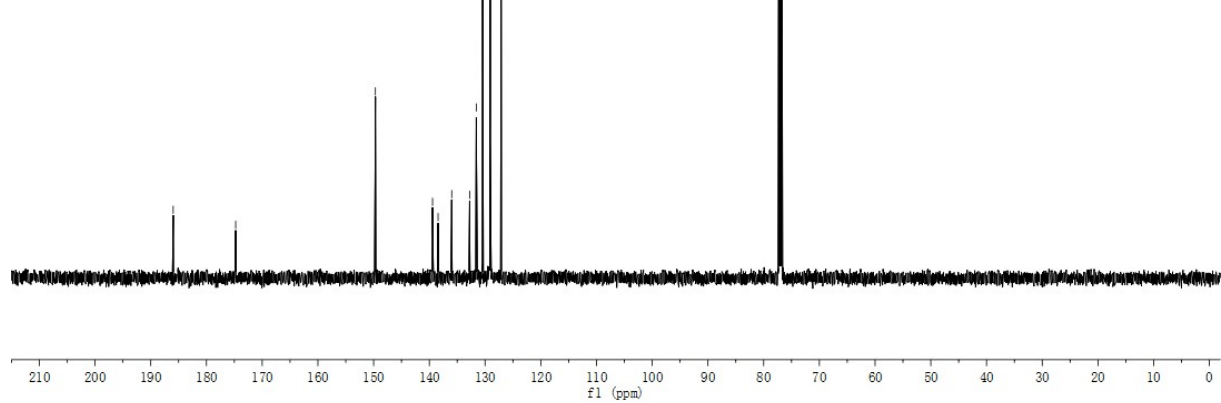

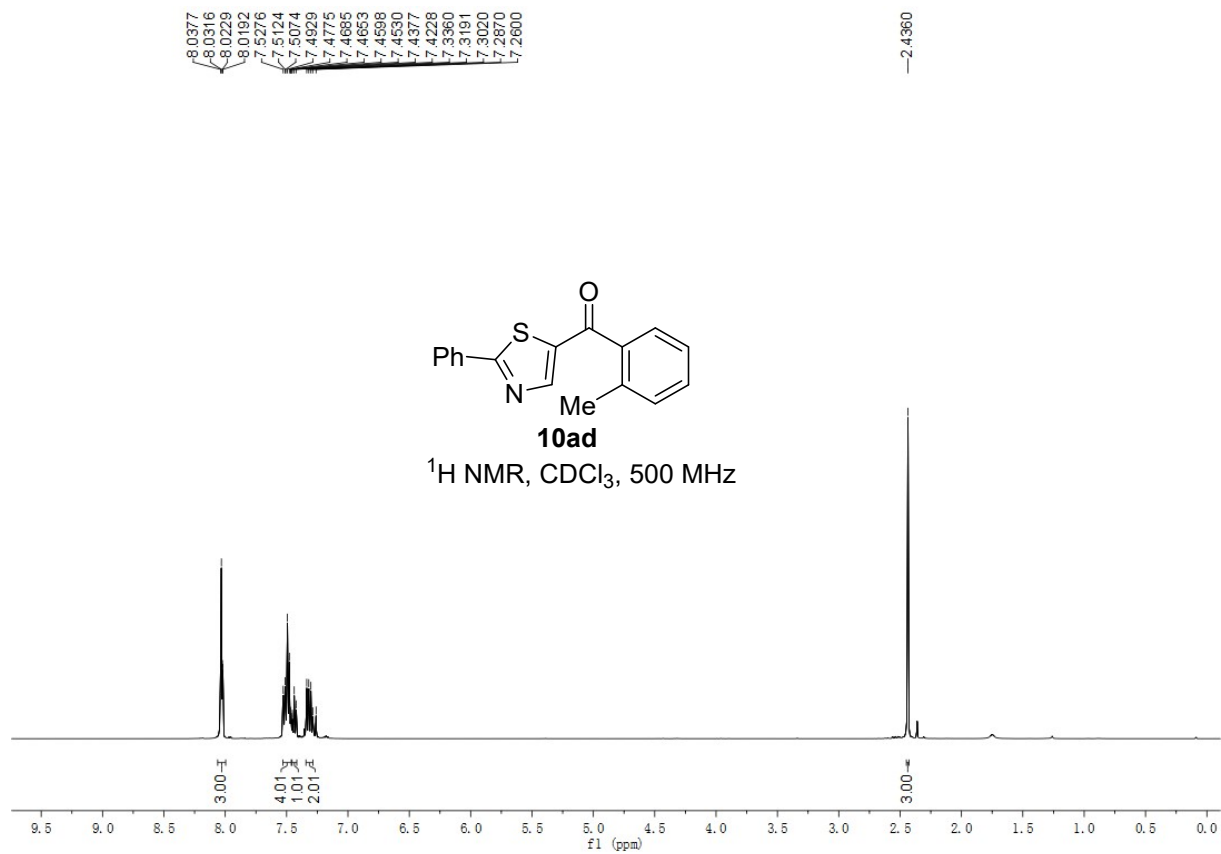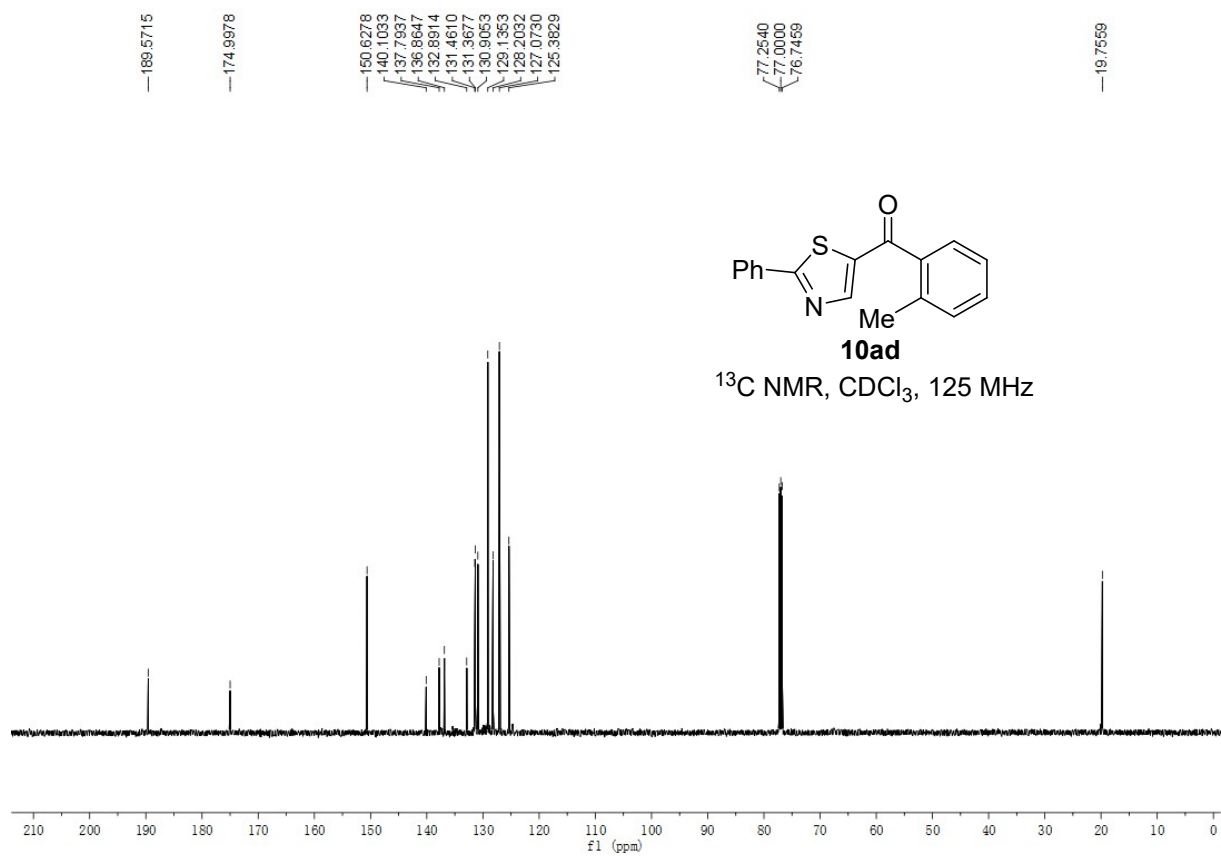

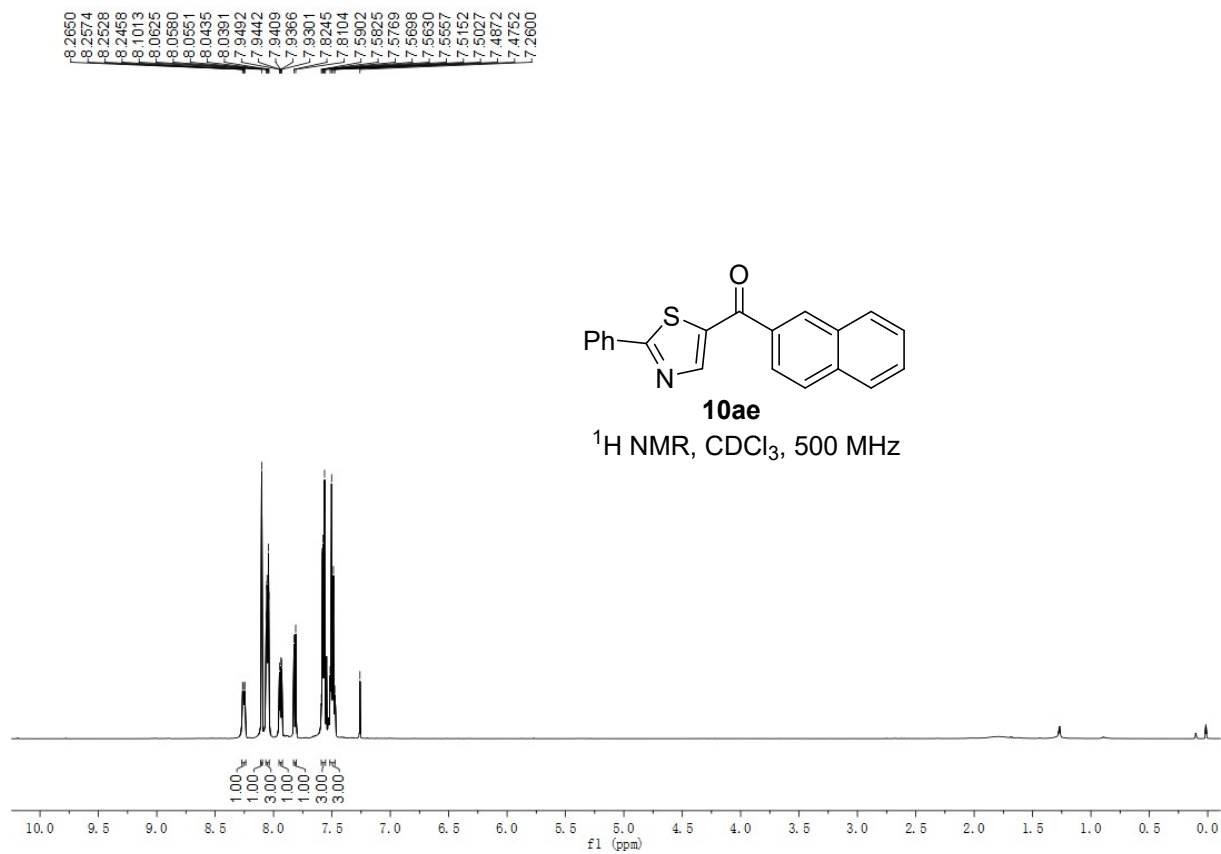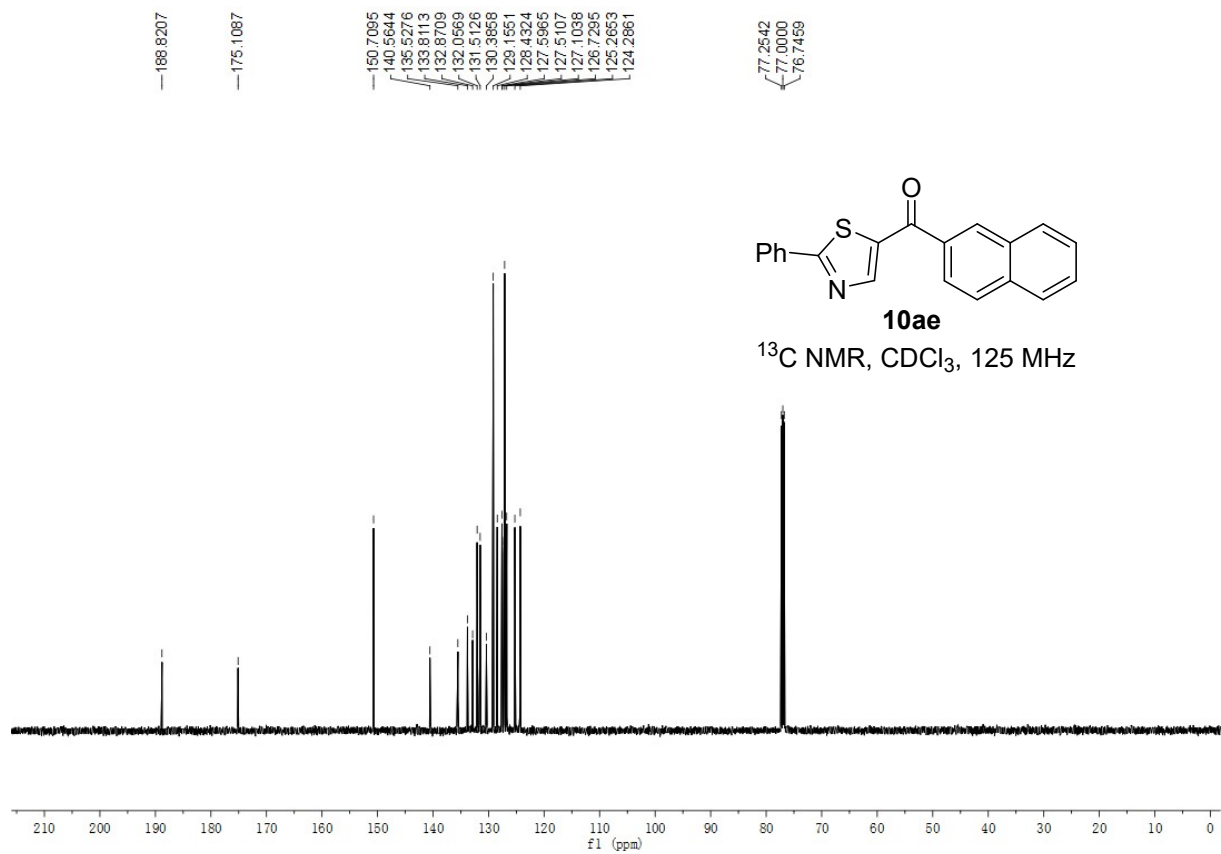

8.5266  
8.0411  
8.0263  
7.9381  
7.9324  
7.7557  
7.7506  
7.5124  
7.5097  
7.4896  
7.4854  
7.4744  
7.2600  
7.2357  
7.2279  
7.2182

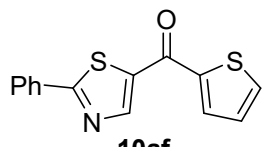

<sup>1</sup>H NMR, CDCl<sub>3</sub>, 500 MHz

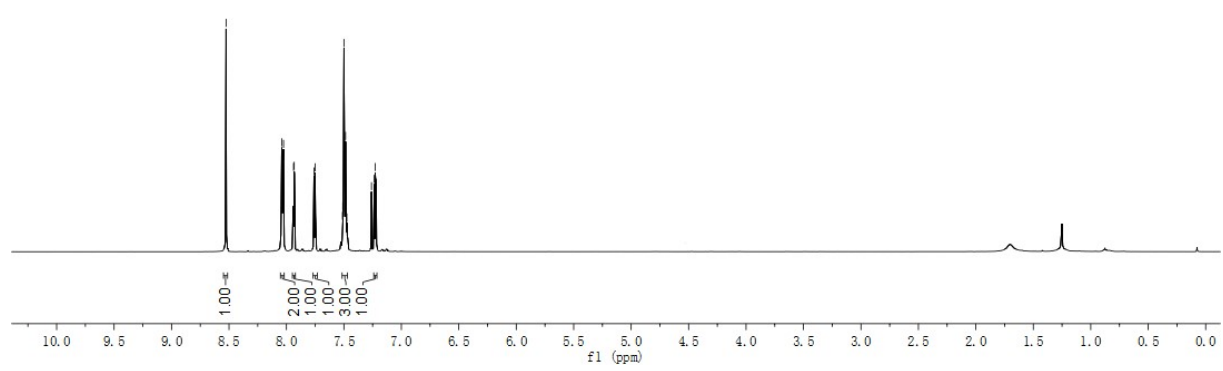

177.7713  
173.8868

148.1324  
142.6595  
138.1229  
134.2039  
133.1786  
132.7978  
131.4138  
129.1686  
128.2409  
127.0262

77.2541  
77.0000  
76.7459

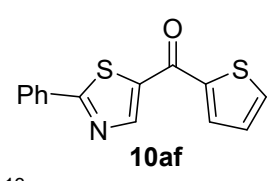

<sup>13</sup>C NMR, CDCl<sub>3</sub>, 125 MHz

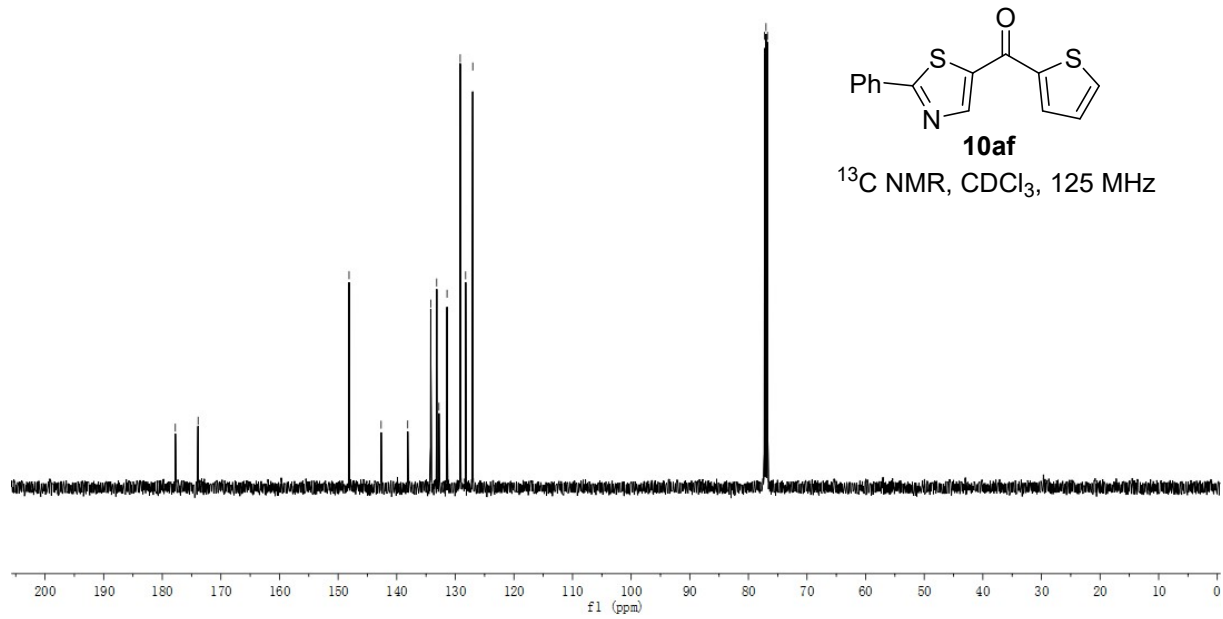

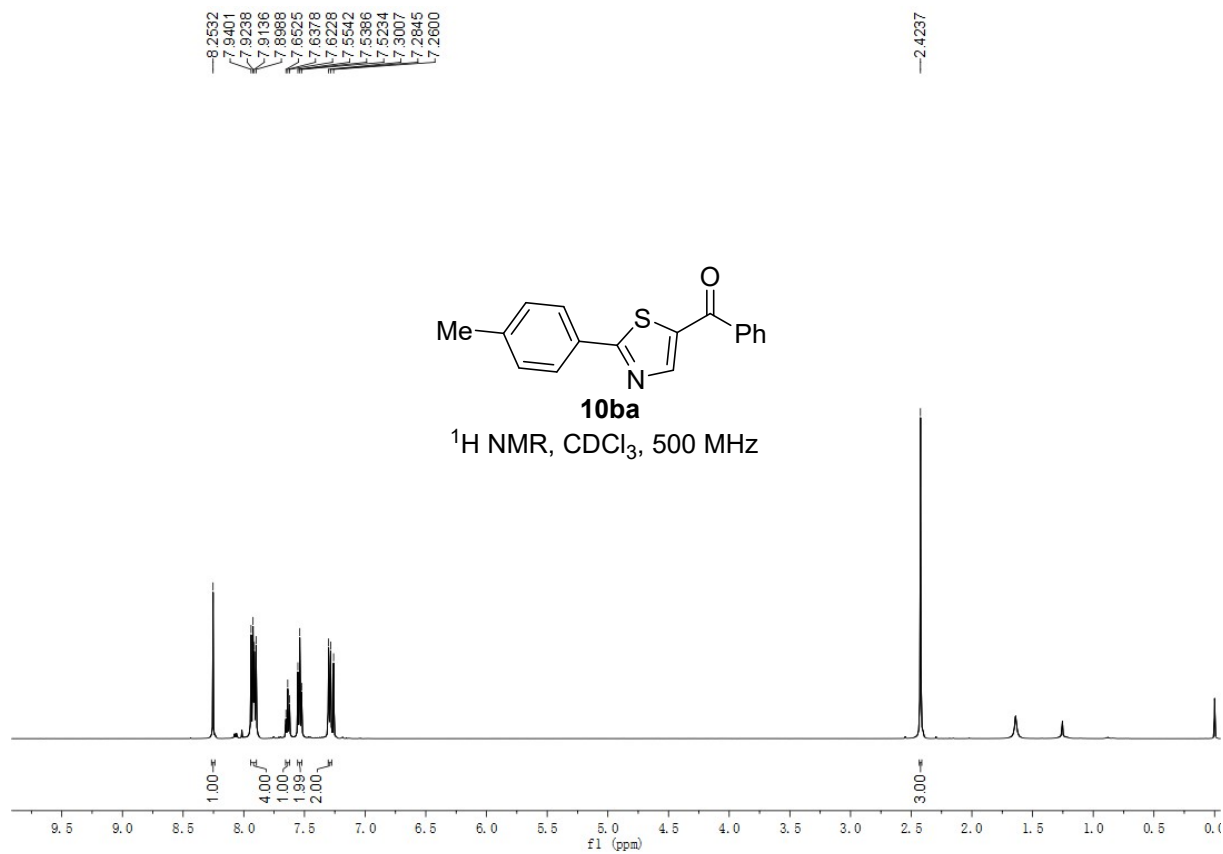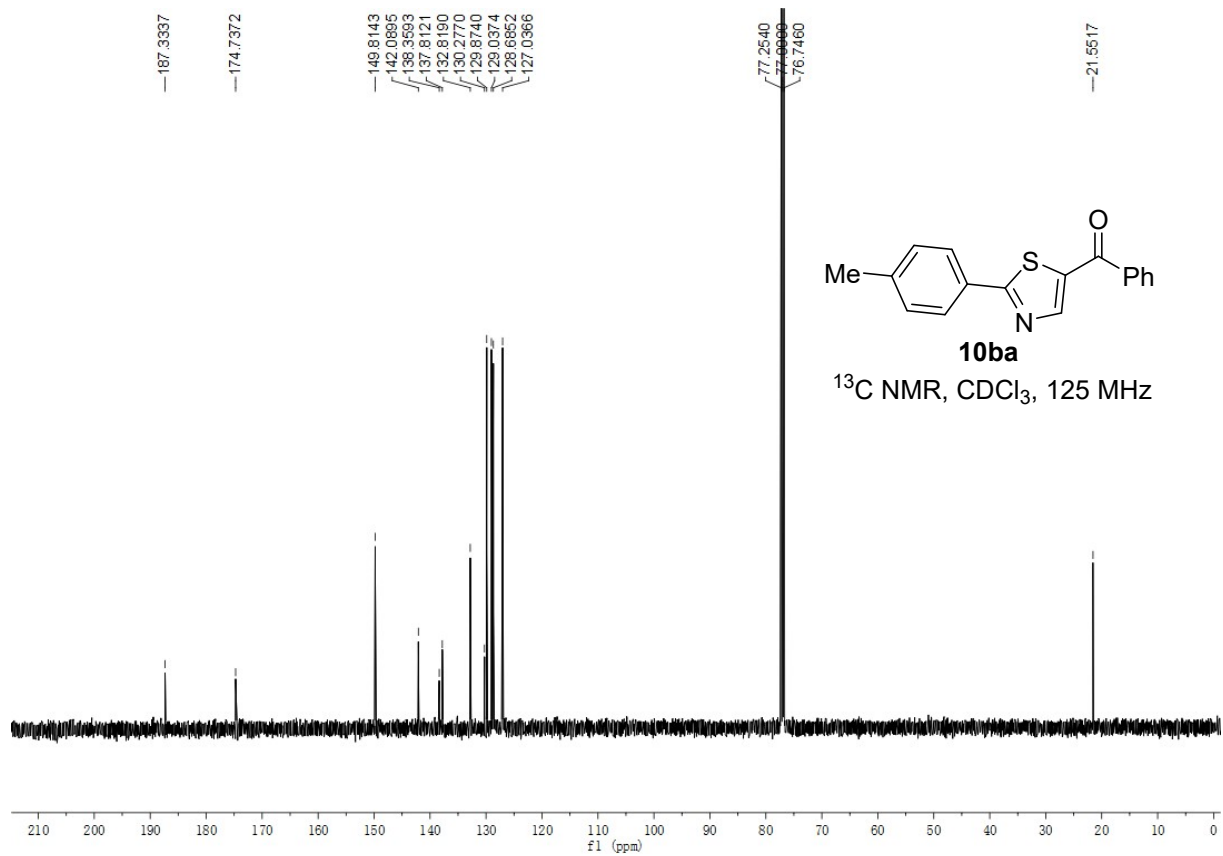

8.2684  
7.9854  
7.9683  
7.9134  
7.8688  
7.6623  
7.6475  
7.6326  
7.5600  
7.5445  
7.5283  
7.4737  
7.4567  
7.2600

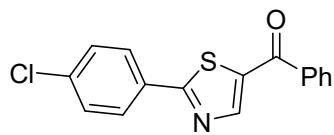

**10ca**

$^1\text{H NMR}$ ,  $\text{CDCl}_3$ , 500 MHz

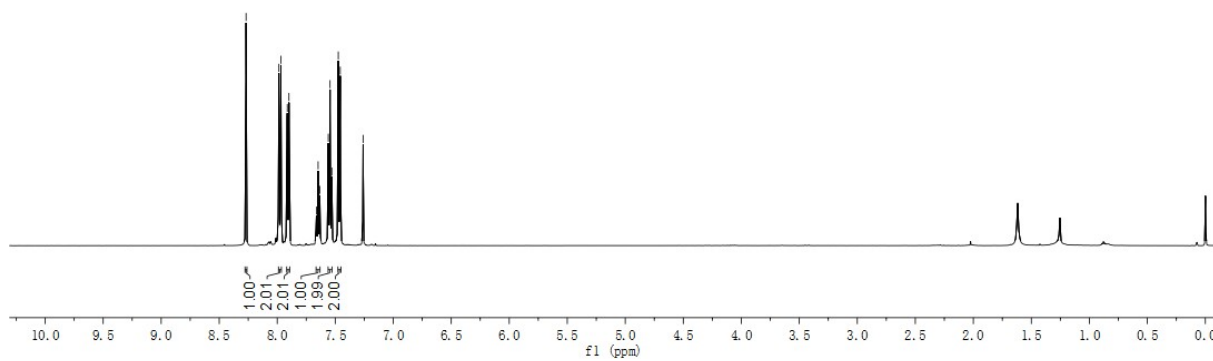

187.1673

172.9463

149.7117

139.1295

137.6056

132.9927

131.3676

129.4629

129.0584

128.7456

128.2638

77.2540

77.0000

76.7458

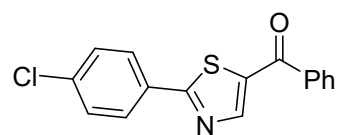

**10ca**

$^{13}\text{C NMR}$ ,  $\text{CDCl}_3$ , 125 MHz

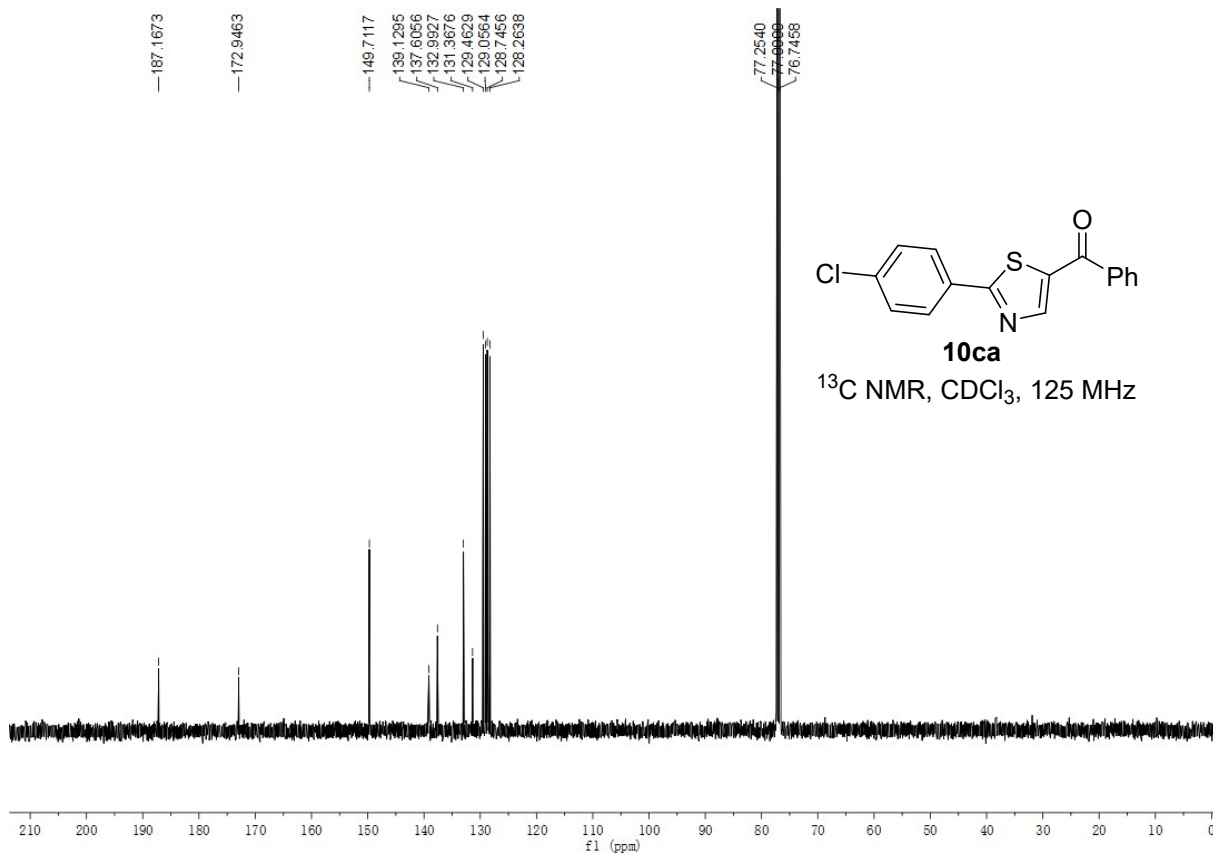

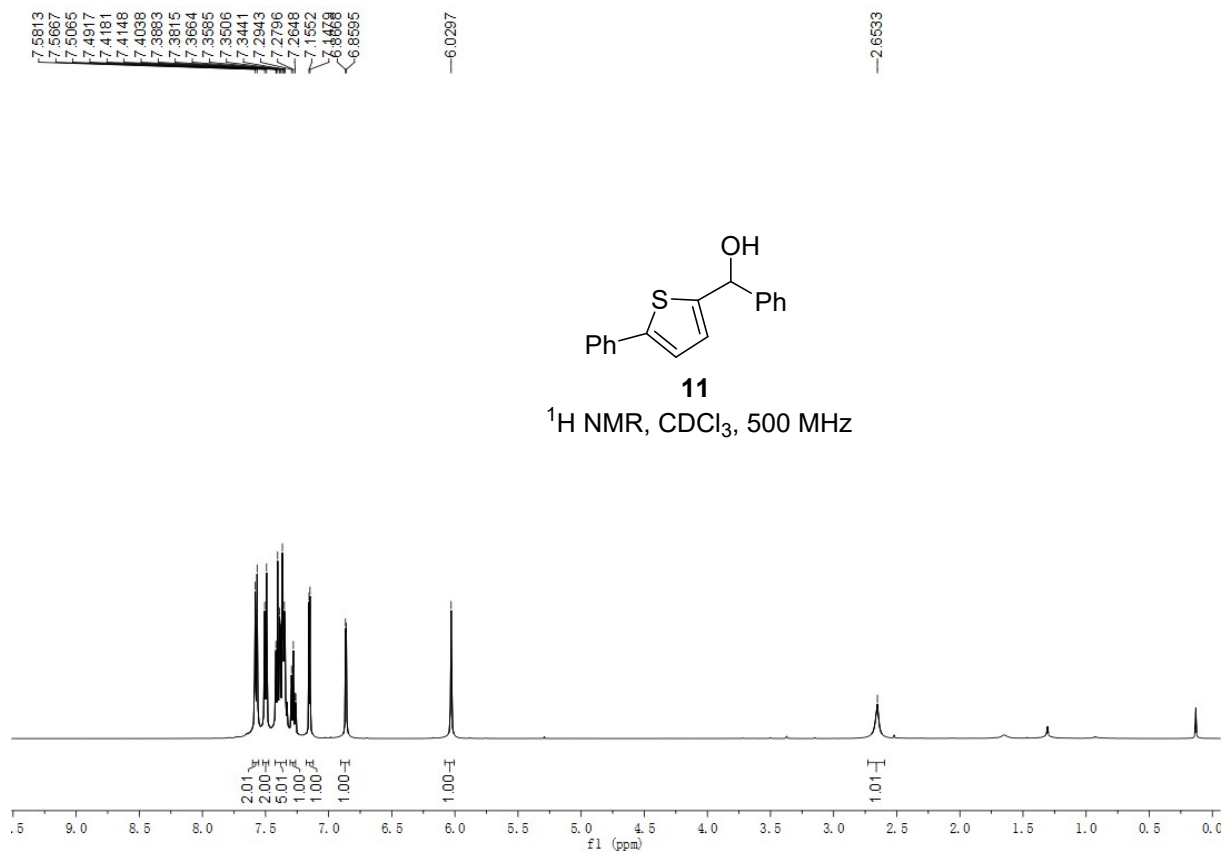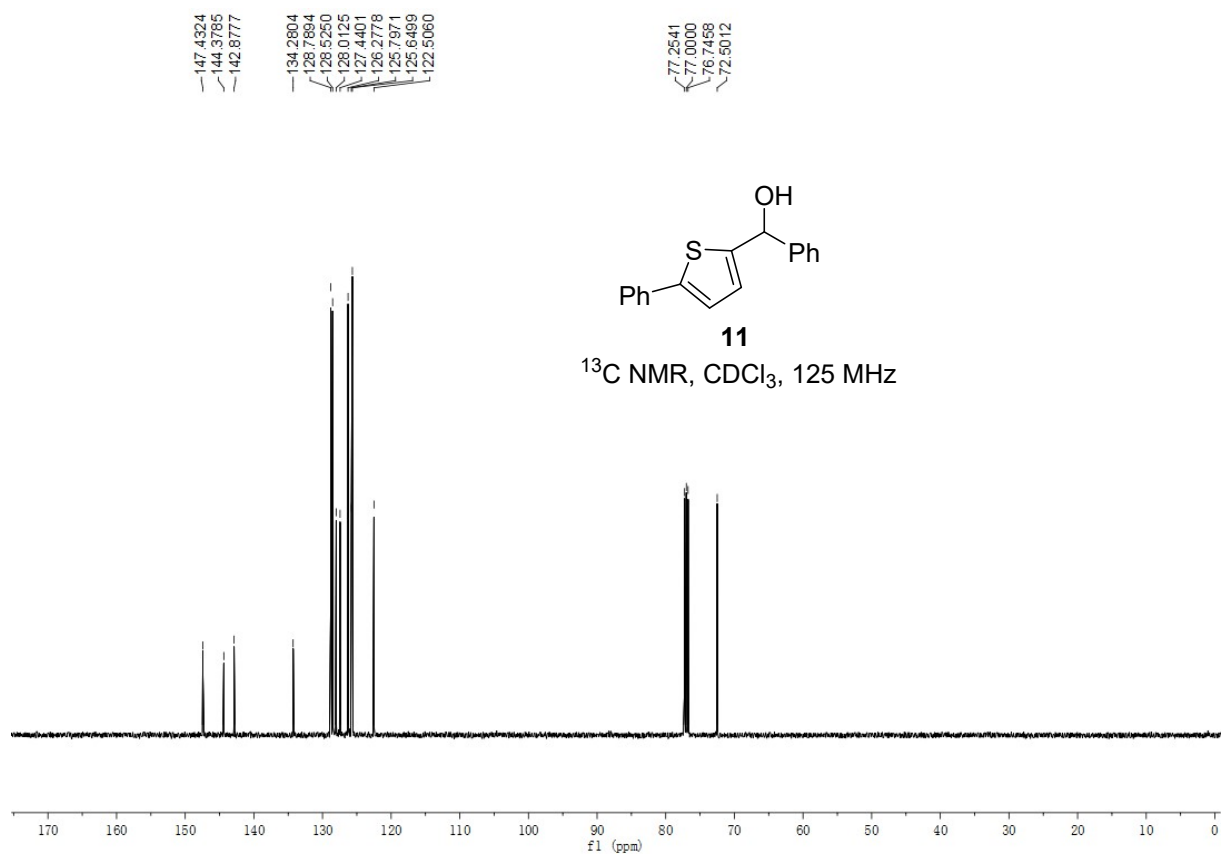

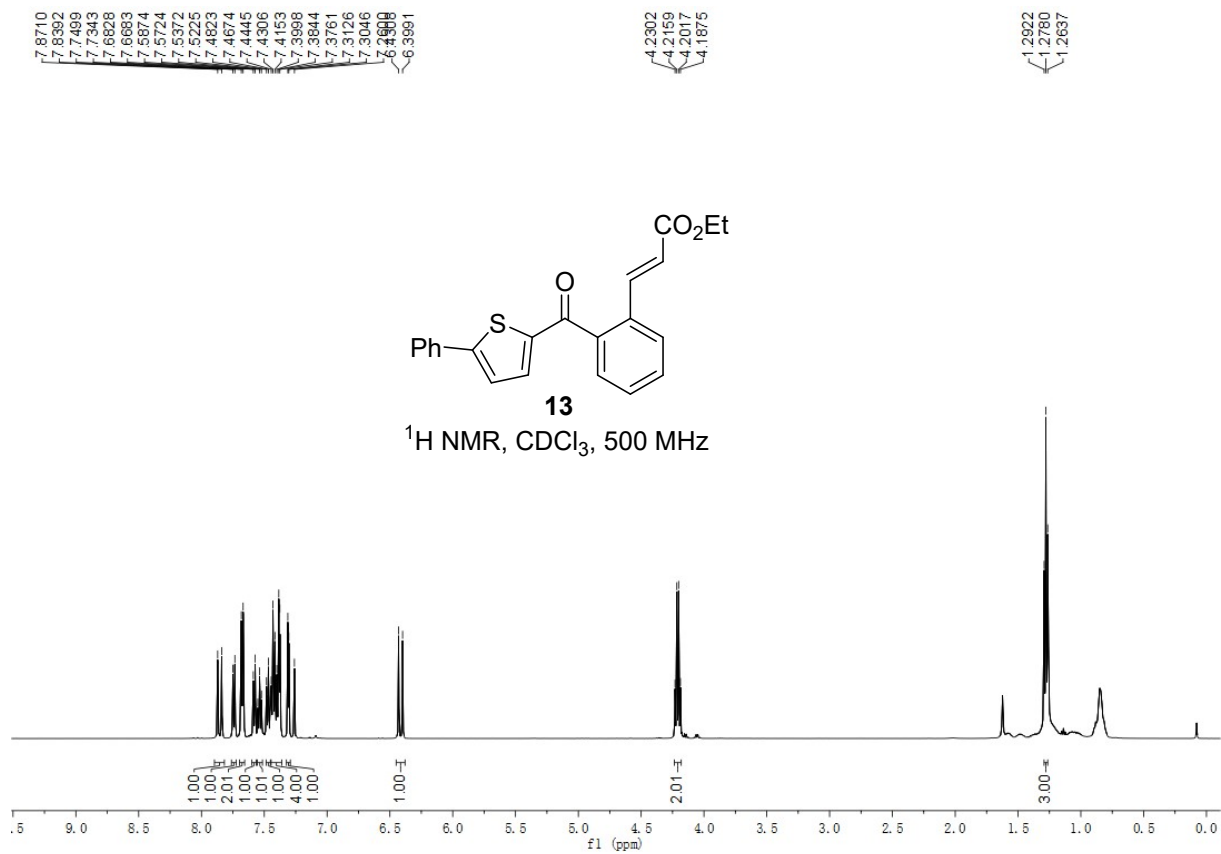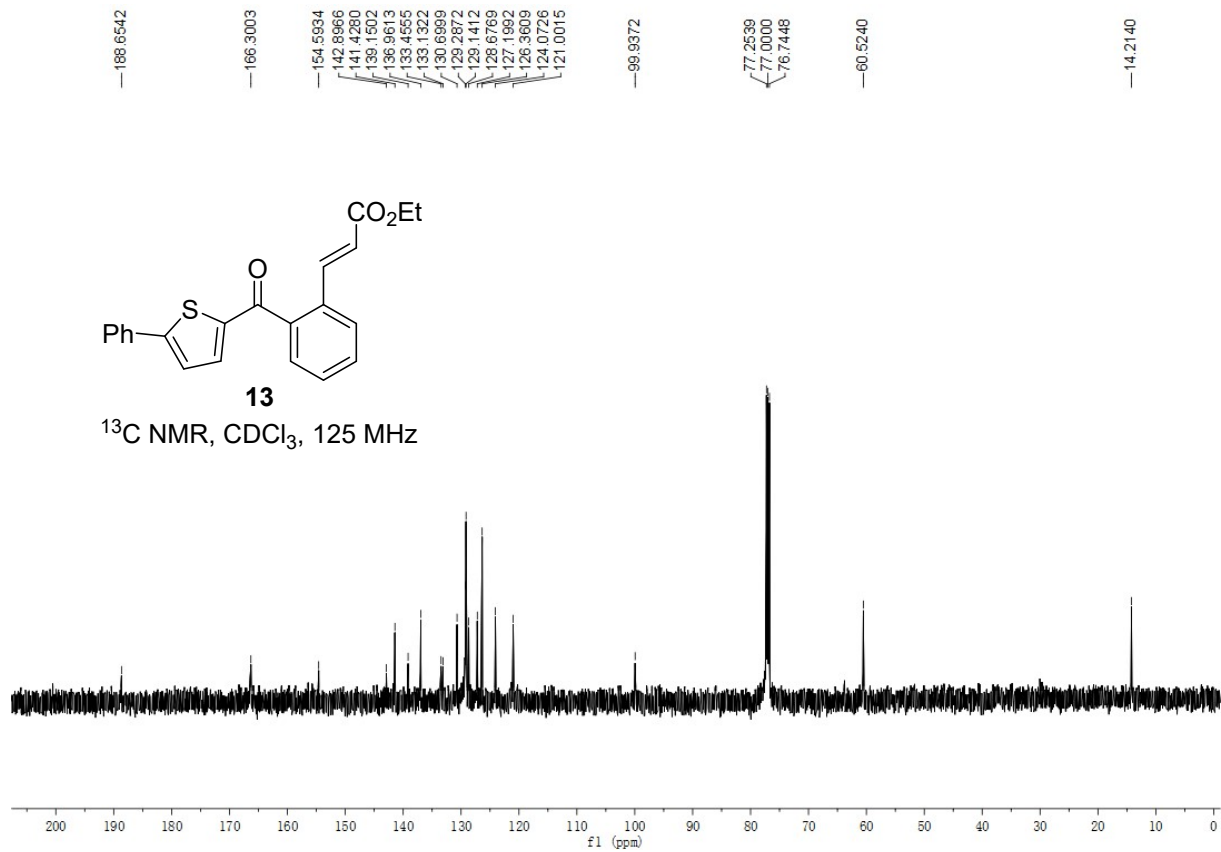

Supplement: d6nj01052k1.pdf [file d6nj01052k1.pdf]
